# Supplementary material for: vConTACT: an iVirus tool to classify double-stranded DNA viruses that infect Archaea and Bacteria
Source: PeerJ. 2017 May 3;5:e3243. doi: 10.7717/peerj.3243 (PMC5419219; doi:10.7717/peerj.3243)
Supplement: Table S1 [file peerj-05-3243-s001.xlsx]

## Sheet: Table S1
Name	Sig score	Name
Achromobacter_phage_JWX	137.66	Achromobacter_phage_83-24
Pseudomonas_phage_MP1412	8.73517	Achromobacter_phage_JWX
Pseudomonas_phage_MP1412	9.12399	Achromobacter_phage_83-24
Pseudomonas_phage_PaMx74	18.2611	Achromobacter_phage_83-24
Pseudomonas_phage_PaMx74	17.677	Achromobacter_phage_JWX
Pseudomonas_phage_PaMx74	36.0391	Pseudomonas_phage_MP1412
Vibrio_phage_vB_VpaS_MAR10	3.66583	Achromobacter_phage_JWX
Vibrio_phage_vB_VpaS_MAR10	3.96099	Achromobacter_phage_83-24
Vibrio_phage_vB_VpaS_MAR10	3.31335	Pseudomonas_phage_PaMx74
Vibrio_phage_vB_VpaS_MAR10	10.6596	Pseudomonas_phage_MP1412
Pseudomonas_phage_YuA	8.73517	Achromobacter_phage_JWX
Pseudomonas_phage_YuA	9.12399	Achromobacter_phage_83-24
Pseudomonas_phage_YuA	10.6596	Vibrio_phage_vB_VpaS_MAR10
Pseudomonas_phage_YuA	214.568	Pseudomonas_phage_MP1412
Pseudomonas_phage_YuA	38.6121	Pseudomonas_phage_PaMx74
Pseudomonas_phage_M6	8.33177	Achromobacter_phage_JWX
Pseudomonas_phage_M6	8.72023	Achromobacter_phage_83-24
Pseudomonas_phage_M6	35.0063	Pseudomonas_phage_PaMx74
Pseudomonas_phage_M6	211.758	Pseudomonas_phage_YuA
Pseudomonas_phage_M6	202.351	Pseudomonas_phage_MP1412
Pseudomonas_phage_M6	10.1613	Vibrio_phage_vB_VpaS_MAR10
Phage_phiJL001	10.1391	Achromobacter_phage_JWX
Phage_phiJL001	10.5747	Achromobacter_phage_83-24
Phage_phiJL001	41.6376	Pseudomonas_phage_YuA
Phage_phiJL001	41.6376	Pseudomonas_phage_MP1412
Phage_phiJL001	42.9326	Pseudomonas_phage_M6
Phage_phiJL001	13.7431	Pseudomonas_phage_PaMx74
Phage_phiJL001	4.44444	Vibrio_phage_vB_VpaS_MAR10
Xanthomonas_phage_Xp15	2.53639	Achromobacter_phage_JWX
Xanthomonas_phage_Xp15	2.78763	Achromobacter_phage_83-24
Xanthomonas_phage_Xp15	3.67205	Pseudomonas_phage_M6
Xanthomonas_phage_Xp15	1.75424	Phage_phiJL001
Xanthomonas_phage_Xp15	3.97979	Pseudomonas_phage_MP1412
Xanthomonas_phage_Xp15	5.95771	Pseudomonas_phage_PaMx74
Xanthomonas_phage_Xp15	3.97979	Pseudomonas_phage_YuA
Pseudomonas_phage_PAE1	8.1908	Achromobacter_phage_JWX
Pseudomonas_phage_PAE1	8.57912	Achromobacter_phage_83-24
Pseudomonas_phage_PAE1	204.704	Pseudomonas_phage_YuA
Pseudomonas_phage_PAE1	34.6476	Pseudomonas_phage_PaMx74
Pseudomonas_phage_PAE1	3.56446	Xanthomonas_phage_Xp15
Pseudomonas_phage_PAE1	42.4927	Phage_phiJL001
Pseudomonas_phage_PAE1	209.375	Pseudomonas_phage_MP1412
Pseudomonas_phage_PAE1	9.98743	Vibrio_phage_vB_VpaS_MAR10
Pseudomonas_phage_PAE1	223.814	Pseudomonas_phage_M6
Pseudomonas_phage_PaMx28	17.7593	Achromobacter_phage_JWX
Pseudomonas_phage_PaMx28	18.3434	Achromobacter_phage_83-24
Pseudomonas_phage_PaMx28	164.472	Pseudomonas_phage_PaMx74
Pseudomonas_phage_PaMx28	36.1813	Pseudomonas_phage_YuA
Pseudomonas_phage_PaMx28	3.35516	Vibrio_phage_vB_VpaS_MAR10
Pseudomonas_phage_PaMx28	33.6363	Pseudomonas_phage_MP1412
Pseudomonas_phage_PaMx28	13.8182	Phage_phiJL001
Pseudomonas_phage_PaMx28	32.6604	Pseudomonas_phage_M6
Pseudomonas_phage_PaMx28	4.104	Xanthomonas_phage_Xp15
Pseudomonas_phage_PaMx28	32.3214	Pseudomonas_phage_PAE1
Roseobacter_phage_RDJL_Phi_1	23.6718	Achromobacter_phage_JWX
Roseobacter_phage_RDJL_Phi_1	24.412	Achromobacter_phage_83-24
Roseobacter_phage_RDJL_Phi_1	29.9937	Pseudomonas_phage_PaMx28
Roseobacter_phage_RDJL_Phi_1	7.12377	Pseudomonas_phage_PAE1
Roseobacter_phage_RDJL_Phi_1	7.66646	Pseudomonas_phage_YuA
Roseobacter_phage_RDJL_Phi_1	29.8674	Pseudomonas_phage_PaMx74
Roseobacter_phage_RDJL_Phi_1	7.26428	Pseudomonas_phage_M6
Roseobacter_phage_RDJL_Phi_1	5.42503	Xanthomonas_phage_Xp15
Roseobacter_phage_RDJL_Phi_1	17.078	Phage_phiJL001
Roseobacter_phage_RDJL_Phi_1	7.66646	Pseudomonas_phage_MP1412
Rhodobacter_phage_RcTitan	10.0863	Achromobacter_phage_83-24
Rhodobacter_phage_RcTitan	9.69672	Achromobacter_phage_JWX
Rhodobacter_phage_RcTitan	3.12494	Pseudomonas_phage_PaMx28
Rhodobacter_phage_RcTitan	13.506	Pseudomonas_phage_MP1412
Rhodobacter_phage_RcTitan	13.0049	Pseudomonas_phage_M6
Rhodobacter_phage_RcTitan	5.06675	Pseudomonas_phage_PaMx74
Rhodobacter_phage_RcTitan	13.506	Pseudomonas_phage_YuA
Rhodobacter_phage_RcTitan	2.60484	Phage_phiJL001
Rhodobacter_phage_RcTitan	9.79306	Vibrio_phage_vB_VpaS_MAR10
Rhodobacter_phage_RcTitan	12.8299	Pseudomonas_phage_PAE1
Burkholderia_phage_KL1	12.4151	Achromobacter_phage_JWX
Burkholderia_phage_KL1	12.8524	Achromobacter_phage_83-24
Burkholderia_phage_KL1	9.55664	Pseudomonas_phage_MP1412
Burkholderia_phage_KL1	9.01127	Pseudomonas_phage_PAE1
Burkholderia_phage_KL1	4.82579	Phage_phiJL001
Burkholderia_phage_KL1	9.15251	Pseudomonas_phage_M6
Burkholderia_phage_KL1	9.55664	Pseudomonas_phage_YuA
Burkholderia_phage_KL1	1.09599	Roseobacter_phage_RDJL_Phi_1
Burkholderia_phage_KL1	1.17298	Xanthomonas_phage_Xp15
Burkholderia_phage_KL1	8.22027	Vibrio_phage_vB_VpaS_MAR10
Burkholderia_phage_KL1	56.9729	Rhodobacter_phage_RcTitan
Paracoccus_phage_vB_PmaS_IMEP1	8.11464	Achromobacter_phage_JWX
Paracoccus_phage_vB_PmaS_IMEP1	8.45801	Achromobacter_phage_83-24
Paracoccus_phage_vB_PmaS_IMEP1	7.04725	Phage_phiJL001
Paracoccus_phage_vB_PmaS_IMEP1	5.18327	Pseudomonas_phage_M6
Paracoccus_phage_vB_PmaS_IMEP1	5.4929	Pseudomonas_phage_MP1412
Paracoccus_phage_vB_PmaS_IMEP1	5.4929	Pseudomonas_phage_YuA
Paracoccus_phage_vB_PmaS_IMEP1	5.07497	Pseudomonas_phage_PAE1
Paracoccus_phage_vB_PmaS_IMEP1	5.22026	Xanthomonas_phage_Xp15
Paracoccus_phage_vB_PmaS_IMEP1	18.3674	Roseobacter_phage_RDJL_Phi_1
Paracoccus_phage_vB_PmaS_IMEP1	51.5954	Rhodobacter_phage_RcTitan
Paracoccus_phage_vB_PmaS_IMEP1	46.7705	Burkholderia_phage_KL1
Pseudomonas_phage_vB_Pae-Kakheti25	12.165	Achromobacter_phage_JWX
Pseudomonas_phage_vB_Pae-Kakheti25	12.6022	Achromobacter_phage_83-24
Pseudomonas_phage_vB_Pae-Kakheti25	6.85004	Pseudomonas_phage_M6
Pseudomonas_phage_vB_Pae-Kakheti25	8.78912	Pseudomonas_phage_PAE1
Pseudomonas_phage_vB_Pae-Kakheti25	7.20632	Pseudomonas_phage_YuA
Pseudomonas_phage_vB_Pae-Kakheti25	7.20632	Pseudomonas_phage_MP1412
Pseudomonas_phage_vB_Pae-Kakheti25	6.0275	Vibrio_phage_vB_VpaS_MAR10
Pseudomonas_phage_vB_Pae-Kakheti25	4.65688	Phage_phiJL001
Pseudomonas_phage_vB_Pae-Kakheti25	1.055	Xanthomonas_phage_Xp15
Pseudomonas_phage_vB_Pae-Kakheti25	56.1799	Rhodobacter_phage_RcTitan
Pseudomonas_phage_vB_Pae-Kakheti25	122.513	Burkholderia_phage_KL1
Pseudomonas_phage_vB_Pae-Kakheti25	43.1413	Paracoccus_phage_vB_PmaS_IMEP1
Stenotrophomonas_phage_vB_SmaS-DLP_2	12.165	Achromobacter_phage_JWX
Stenotrophomonas_phage_vB_SmaS-DLP_2	12.6022	Achromobacter_phage_83-24
Stenotrophomonas_phage_vB_SmaS-DLP_2	4.65688	Phage_phiJL001
Stenotrophomonas_phage_vB_SmaS-DLP_2	6.85004	Pseudomonas_phage_M6
Stenotrophomonas_phage_vB_SmaS-DLP_2	7.20632	Pseudomonas_phage_MP1412
Stenotrophomonas_phage_vB_SmaS-DLP_2	7.20632	Pseudomonas_phage_YuA
Stenotrophomonas_phage_vB_SmaS-DLP_2	8.78912	Pseudomonas_phage_PAE1
Stenotrophomonas_phage_vB_SmaS-DLP_2	1.055	Xanthomonas_phage_Xp15
Stenotrophomonas_phage_vB_SmaS-DLP_2	6.0275	Vibrio_phage_vB_VpaS_MAR10
Stenotrophomonas_phage_vB_SmaS-DLP_2	53.1283	Rhodobacter_phage_RcTitan
Stenotrophomonas_phage_vB_SmaS-DLP_2	160.473	Pseudomonas_phage_vB_Pae-Kakheti25
Stenotrophomonas_phage_vB_SmaS-DLP_2	43.1413	Paracoccus_phage_vB_PmaS_IMEP1
Stenotrophomonas_phage_vB_SmaS-DLP_2	118.413	Burkholderia_phage_KL1
Pseudomonas_phage_vB_PaeS_SCH_Ab26	12.6807	Achromobacter_phage_JWX
Pseudomonas_phage_vB_PaeS_SCH_Ab26	13.1181	Achromobacter_phage_83-24
Pseudomonas_phage_vB_PaeS_SCH_Ab26	7.60926	Pseudomonas_phage_YuA
Pseudomonas_phage_vB_PaeS_SCH_Ab26	5.00489	Phage_phiJL001
Pseudomonas_phage_vB_PaeS_SCH_Ab26	7.25262	Pseudomonas_phage_M6
Pseudomonas_phage_vB_PaeS_SCH_Ab26	7.60926	Pseudomonas_phage_MP1412
Pseudomonas_phage_vB_PaeS_SCH_Ab26	9.24708	Pseudomonas_phage_PAE1
Pseudomonas_phage_vB_PaeS_SCH_Ab26	6.4291	Vibrio_phage_vB_VpaS_MAR10
Pseudomonas_phage_vB_PaeS_SCH_Ab26	1.22088	Roseobacter_phage_RDJL_Phi_1
Pseudomonas_phage_vB_PaeS_SCH_Ab26	1.29794	Xanthomonas_phage_Xp15
Pseudomonas_phage_vB_PaeS_SCH_Ab26	137.971	Stenotrophomonas_phage_vB_SmaS-DLP_2
Pseudomonas_phage_vB_PaeS_SCH_Ab26	44.3806	Paracoccus_phage_vB_PmaS_IMEP1
Pseudomonas_phage_vB_PaeS_SCH_Ab26	152.403	Pseudomonas_phage_vB_Pae-Kakheti25
Pseudomonas_phage_vB_PaeS_SCH_Ab26	57.8281	Rhodobacter_phage_RcTitan
Pseudomonas_phage_vB_PaeS_SCH_Ab26	113.942	Burkholderia_phage_KL1
Pseudomonas_phage_PaMx42	12.7673	Achromobacter_phage_83-24
Pseudomonas_phage_PaMx42	12.3301	Achromobacter_phage_JWX
Pseudomonas_phage_PaMx42	7.33542	Pseudomonas_phage_YuA
Pseudomonas_phage_PaMx42	8.93578	Pseudomonas_phage_PAE1
Pseudomonas_phage_PaMx42	7.33542	Pseudomonas_phage_MP1412
Pseudomonas_phage_PaMx42	1.38223	Pseudomonas_phage_PaMx74
Pseudomonas_phage_PaMx42	6.97902	Pseudomonas_phage_M6
Pseudomonas_phage_PaMx42	4.76841	Phage_phiJL001
Pseudomonas_phage_PaMx42	2.92469	Roseobacter_phage_RDJL_Phi_1
Pseudomonas_phage_PaMx42	6.15615	Vibrio_phage_vB_VpaS_MAR10
Pseudomonas_phage_PaMx42	3.01784	Xanthomonas_phage_Xp15
Pseudomonas_phage_PaMx42	59.8237	Rhodobacter_phage_RcTitan
Pseudomonas_phage_PaMx42	121.686	Pseudomonas_phage_vB_PaeS_SCH_Ab26
Pseudomonas_phage_PaMx42	130.203	Pseudomonas_phage_vB_Pae-Kakheti25
Pseudomonas_phage_PaMx42	134.507	Stenotrophomonas_phage_vB_SmaS-DLP_2
Pseudomonas_phage_PaMx42	46.554	Paracoccus_phage_vB_PmaS_IMEP1
Pseudomonas_phage_PaMx42	111.513	Burkholderia_phage_KL1
Pseudomonas_phage_73	13.1181	Achromobacter_phage_83-24
Pseudomonas_phage_73	12.6807	Achromobacter_phage_JWX
Pseudomonas_phage_73	7.60926	Pseudomonas_phage_YuA
Pseudomonas_phage_73	7.12792	Pseudomonas_phage_PAE1
Pseudomonas_phage_73	7.60926	Pseudomonas_phage_MP1412
Pseudomonas_phage_73	1.22088	Roseobacter_phage_RDJL_Phi_1
Pseudomonas_phage_73	6.4291	Vibrio_phage_vB_VpaS_MAR10
Pseudomonas_phage_73	1.29794	Xanthomonas_phage_Xp15
Pseudomonas_phage_73	7.25262	Pseudomonas_phage_M6
Pseudomonas_phage_73	5.00489	Phage_phiJL001
Pseudomonas_phage_73	57.8281	Rhodobacter_phage_RcTitan
Pseudomonas_phage_73	117.487	Pseudomonas_phage_PaMx42
Pseudomonas_phage_73	44.3806	Paracoccus_phage_vB_PmaS_IMEP1
Pseudomonas_phage_73	142.624	Stenotrophomonas_phage_vB_SmaS-DLP_2
Pseudomonas_phage_73	109.873	Burkholderia_phage_KL1
Pseudomonas_phage_73	137.971	Pseudomonas_phage_vB_Pae-Kakheti25
Pseudomonas_phage_73	124.397	Pseudomonas_phage_vB_PaeS_SCH_Ab26
Acinetobacter_phage_IME_AB3	9.97998	Achromobacter_phage_JWX
Acinetobacter_phage_IME_AB3	10.3697	Achromobacter_phage_83-24
Acinetobacter_phage_IME_AB3	3.20164	Pseudomonas_phage_MP1412
Acinetobacter_phage_IME_AB3	3.20164	Pseudomonas_phage_YuA
Acinetobacter_phage_IME_AB3	2.84667	Pseudomonas_phage_PAE1
Acinetobacter_phage_IME_AB3	2.93868	Pseudomonas_phage_M6
Acinetobacter_phage_IME_AB3	2.78713	Phage_phiJL001
Acinetobacter_phage_IME_AB3	4.17555	Vibrio_phage_vB_VpaS_MAR10
Acinetobacter_phage_IME_AB3	50.3504	Rhodobacter_phage_RcTitan
Acinetobacter_phage_IME_AB3	67.3573	Pseudomonas_phage_PaMx42
Acinetobacter_phage_IME_AB3	43.3363	Paracoccus_phage_vB_PmaS_IMEP1
Acinetobacter_phage_IME_AB3	66.7481	Pseudomonas_phage_vB_Pae-Kakheti25
Acinetobacter_phage_IME_AB3	65.3459	Pseudomonas_phage_vB_PaeS_SCH_Ab26
Acinetobacter_phage_IME_AB3	66.7481	Stenotrophomonas_phage_vB_SmaS-DLP_2
Acinetobacter_phage_IME_AB3	64.3939	Burkholderia_phage_KL1
Acinetobacter_phage_IME_AB3	68.6772	Pseudomonas_phage_73
Burkholderia_phage_BcepGomr	17.677	Achromobacter_phage_JWX
Burkholderia_phage_BcepGomr	20.6449	Achromobacter_phage_83-24
Burkholderia_phage_BcepGomr	1.59952	Vibrio_phage_vB_VpaS_MAR10
Burkholderia_phage_BcepGomr	2.46667	Pseudomonas_phage_MP1412
Burkholderia_phage_BcepGomr	2.11313	Pseudomonas_phage_PAE1
Burkholderia_phage_BcepGomr	2.20474	Pseudomonas_phage_M6
Burkholderia_phage_BcepGomr	2.05385	Phage_phiJL001
Burkholderia_phage_BcepGomr	2.46667	Pseudomonas_phage_YuA
Burkholderia_phage_BcepGomr	23.8449	Burkholderia_phage_KL1
Burkholderia_phage_BcepGomr	24.2676	Pseudomonas_phage_vB_PaeS_SCH_Ab26
Burkholderia_phage_BcepGomr	19.2713	Paracoccus_phage_vB_PmaS_IMEP1
Burkholderia_phage_BcepGomr	23.71	Pseudomonas_phage_PaMx42
Burkholderia_phage_BcepGomr	23.4483	Pseudomonas_phage_vB_Pae-Kakheti25
Burkholderia_phage_BcepGomr	23.5778	Acinetobacter_phage_IME_AB3
Burkholderia_phage_BcepGomr	20.6449	Rhodobacter_phage_RcTitan
Burkholderia_phage_BcepGomr	23.4483	Stenotrophomonas_phage_vB_SmaS-DLP_2
Burkholderia_phage_BcepGomr	24.2676	Pseudomonas_phage_73
Achromobacter_phage_phiAxp-1	24.226	Achromobacter_phage_83-24
Achromobacter_phage_phiAxp-1	23.5379	Achromobacter_phage_JWX
Achromobacter_phage_phiAxp-1	4.83226	Pseudomonas_phage_YuA
Achromobacter_phage_phiAxp-1	4.52334	Pseudomonas_phage_M6
Achromobacter_phage_phiAxp-1	4.3454	Phage_phiJL001
Achromobacter_phage_phiAxp-1	4.83226	Pseudomonas_phage_MP1412
Achromobacter_phage_phiAxp-1	6.36562	Pseudomonas_phage_PAE1
Achromobacter_phage_phiAxp-1	3.80971	Vibrio_phage_vB_VpaS_MAR10
Achromobacter_phage_phiAxp-1	58.5448	Stenotrophomonas_phage_vB_SmaS-DLP_2
Achromobacter_phage_phiAxp-1	60.2832	Pseudomonas_phage_73
Achromobacter_phage_phiAxp-1	39.1679	Paracoccus_phage_vB_PmaS_IMEP1
Achromobacter_phage_phiAxp-1	59.095	Pseudomonas_phage_PaMx42
Achromobacter_phage_phiAxp-1	57.1352	Pseudomonas_phage_vB_PaeS_SCH_Ab26
Achromobacter_phage_phiAxp-1	58.8166	Acinetobacter_phage_IME_AB3
Achromobacter_phage_phiAxp-1	45.9308	Rhodobacter_phage_RcTitan
Achromobacter_phage_phiAxp-1	58.5448	Pseudomonas_phage_vB_Pae-Kakheti25
Achromobacter_phage_phiAxp-1	30.1894	Burkholderia_phage_BcepGomr
Achromobacter_phage_phiAxp-1	56.28	Burkholderia_phage_KL1
Erwinia_phage_vB_EamP-S6	46.184	Achromobacter_phage_JWAlpha
Escherichia_phage_vB_EcoP_PhAPEC7	90.3426	Achromobacter_phage_JWAlpha
Escherichia_phage_vB_EcoP_PhAPEC7	42.6175	Erwinia_phage_vB_EamP-S6
Salmonella_phage_FSL_SP-058	41.2654	Escherichia_phage_vB_EcoP_PhAPEC7
Salmonella_phage_FSL_SP-058	57.0446	Erwinia_phage_vB_EamP-S6
Salmonella_phage_FSL_SP-058	35.2676	Achromobacter_phage_JWAlpha
Enterobacter_phage_EcP1	46.1155	Erwinia_phage_vB_EamP-S6
Enterobacter_phage_EcP1	36.4852	Achromobacter_phage_JWAlpha
Enterobacter_phage_EcP1	40.0358	Escherichia_phage_vB_EcoP_PhAPEC7
Enterobacter_phage_EcP1	66.6577	Salmonella_phage_FSL_SP-058
Vibrio_phage_JA-1	32.2433	Escherichia_phage_vB_EcoP_PhAPEC7
Vibrio_phage_JA-1	35.4918	Enterobacter_phage_EcP1
Vibrio_phage_JA-1	36.8151	Salmonella_phage_FSL_SP-058
Vibrio_phage_JA-1	31.3447	Achromobacter_phage_JWAlpha
Vibrio_phage_JA-1	33.7065	Erwinia_phage_vB_EamP-S6
Shigella_phage_pSb-1	39.7865	Erwinia_phage_vB_EamP-S6
Shigella_phage_pSb-1	43.5526	Salmonella_phage_FSL_SP-058
Shigella_phage_pSb-1	34.8713	Vibrio_phage_JA-1
Shigella_phage_pSb-1	170.255	Escherichia_phage_vB_EcoP_PhAPEC7
Shigella_phage_pSb-1	40.0351	Enterobacter_phage_EcP1
Shigella_phage_pSb-1	85.1321	Achromobacter_phage_JWAlpha
Delftia_phage_RG-2014	39.2326	Enterobacter_phage_EcP1
Delftia_phage_RG-2014	65.7611	Achromobacter_phage_JWAlpha
Delftia_phage_RG-2014	67.4687	Escherichia_phage_vB_EcoP_PhAPEC7
Delftia_phage_RG-2014	41.6897	Erwinia_phage_vB_EamP-S6
Delftia_phage_RG-2014	58.256	Shigella_phage_pSb-1
Delftia_phage_RG-2014	36.4417	Vibrio_phage_JA-1
Delftia_phage_RG-2014	35.5085	Salmonella_phage_FSL_SP-058
Escherichia_phage_ECBP1	42.78	Erwinia_phage_vB_EamP-S6
Escherichia_phage_ECBP1	40.1763	Enterobacter_phage_EcP1
Escherichia_phage_ECBP1	32.3626	Vibrio_phage_JA-1
Escherichia_phage_ECBP1	67.6971	Delftia_phage_RG-2014
Escherichia_phage_ECBP1	43.9663	Salmonella_phage_FSL_SP-058
Escherichia_phage_ECBP1	217.511	Escherichia_phage_vB_EcoP_PhAPEC7
Escherichia_phage_ECBP1	178.641	Shigella_phage_pSb-1
Escherichia_phage_ECBP1	90.6485	Achromobacter_phage_JWAlpha
Escherichia_phage_vB_EcoP_G7C	62.7719	Delftia_phage_RG-2014
Escherichia_phage_vB_EcoP_G7C	43.221	Enterobacter_phage_EcP1
Escherichia_phage_vB_EcoP_G7C	32.7307	Vibrio_phage_JA-1
Escherichia_phage_vB_EcoP_G7C	180.901	Escherichia_phage_ECBP1
Escherichia_phage_vB_EcoP_G7C	176.083	Escherichia_phage_vB_EcoP_PhAPEC7
Escherichia_phage_vB_EcoP_G7C	40.8431	Erwinia_phage_vB_EamP-S6
Escherichia_phage_vB_EcoP_G7C	197.643	Shigella_phage_pSb-1
Escherichia_phage_vB_EcoP_G7C	91.5998	Achromobacter_phage_JWAlpha
Escherichia_phage_vB_EcoP_G7C	41.8696	Salmonella_phage_FSL_SP-058
Sulfitobacter_phage_EE36phi1	42.3005	Escherichia_phage_vB_EcoP_PhAPEC7
Sulfitobacter_phage_EE36phi1	45.5332	Escherichia_phage_vB_EcoP_G7C
Sulfitobacter_phage_EE36phi1	33.9842	Delftia_phage_RG-2014
Sulfitobacter_phage_EE36phi1	35.4918	Enterobacter_phage_EcP1
Sulfitobacter_phage_EE36phi1	31.8952	Salmonella_phage_FSL_SP-058
Sulfitobacter_phage_EE36phi1	42.1903	Shigella_phage_pSb-1
Sulfitobacter_phage_EE36phi1	31.3898	Erwinia_phage_vB_EamP-S6
Sulfitobacter_phage_EE36phi1	45.0535	Escherichia_phage_ECBP1
Sulfitobacter_phage_EE36phi1	48.9109	Achromobacter_phage_JWAlpha
Sulfitobacter_phage_EE36phi1	30.2749	Vibrio_phage_JA-1
Alteromonas_phage_vB_AmaP_AD45-P1	14.0046	Enterobacter_phage_EcP1
Alteromonas_phage_vB_AmaP_AD45-P1	13.4307	Erwinia_phage_vB_EamP-S6
Alteromonas_phage_vB_AmaP_AD45-P1	13.849	Sulfitobacter_phage_EE36phi1
Alteromonas_phage_vB_AmaP_AD45-P1	17.5558	Escherichia_phage_vB_EcoP_PhAPEC7
Alteromonas_phage_vB_AmaP_AD45-P1	13.3366	Salmonella_phage_FSL_SP-058
Alteromonas_phage_vB_AmaP_AD45-P1	13.849	Vibrio_phage_JA-1
Alteromonas_phage_vB_AmaP_AD45-P1	13.849	Escherichia_phage_vB_EcoP_G7C
Alteromonas_phage_vB_AmaP_AD45-P1	15.0777	Delftia_phage_RG-2014
Alteromonas_phage_vB_AmaP_AD45-P1	15.6124	Escherichia_phage_ECBP1
Alteromonas_phage_vB_AmaP_AD45-P1	12.9979	Achromobacter_phage_JWAlpha
Alteromonas_phage_vB_AmaP_AD45-P1	12.2611	Shigella_phage_pSb-1
Erwinia_phage_Ea9-2	38.6098	Enterobacter_phage_EcP1
Erwinia_phage_Ea9-2	63.1615	Erwinia_phage_vB_EamP-S6
Erwinia_phage_Ea9-2	12.8042	Alteromonas_phage_vB_AmaP_AD45-P1
Erwinia_phage_Ea9-2	67.906	Delftia_phage_RG-2014
Erwinia_phage_Ea9-2	98.8226	Shigella_phage_pSb-1
Erwinia_phage_Ea9-2	103.242	Escherichia_phage_vB_EcoP_G7C
Erwinia_phage_Ea9-2	105.295	Escherichia_phage_ECBP1
Erwinia_phage_Ea9-2	43.325	Sulfitobacter_phage_EE36phi1
Erwinia_phage_Ea9-2	90.2273	Achromobacter_phage_JWAlpha
Erwinia_phage_Ea9-2	33.4237	Vibrio_phage_JA-1
Erwinia_phage_Ea9-2	44.7402	Salmonella_phage_FSL_SP-058
Erwinia_phage_Ea9-2	104.933	Escherichia_phage_vB_EcoP_PhAPEC7
Escherichia_phage_vB_EcoP_PhAPEC5	164.043	Escherichia_phage_vB_EcoP_G7C
Escherichia_phage_vB_EcoP_PhAPEC5	41.2654	Salmonella_phage_FSL_SP-058
Escherichia_phage_vB_EcoP_PhAPEC5	159.166	Shigella_phage_pSb-1
Escherichia_phage_vB_EcoP_PhAPEC5	203.622	Escherichia_phage_ECBP1
Escherichia_phage_vB_EcoP_PhAPEC5	44.8983	Sulfitobacter_phage_EE36phi1
Escherichia_phage_vB_EcoP_PhAPEC5	17.5558	Alteromonas_phage_vB_AmaP_AD45-P1
Escherichia_phage_vB_EcoP_PhAPEC5	32.2433	Vibrio_phage_JA-1
Escherichia_phage_vB_EcoP_PhAPEC5	92.5765	Erwinia_phage_Ea9-2
Escherichia_phage_vB_EcoP_PhAPEC5	64.6734	Delftia_phage_RG-2014
Escherichia_phage_vB_EcoP_PhAPEC5	40.0358	Enterobacter_phage_EcP1
Escherichia_phage_vB_EcoP_PhAPEC5	221.281	Escherichia_phage_vB_EcoP_PhAPEC7
Escherichia_phage_vB_EcoP_PhAPEC5	42.6175	Erwinia_phage_vB_EamP-S6
Escherichia_phage_vB_EcoP_PhAPEC5	87.3306	Achromobacter_phage_JWAlpha
Salmonella_phage_FSL_SP-076	37.3373	Vibrio_phage_JA-1
Salmonella_phage_FSL_SP-076	36.0303	Delftia_phage_RG-2014
Salmonella_phage_FSL_SP-076	13.6236	Alteromonas_phage_vB_AmaP_AD45-P1
Salmonella_phage_FSL_SP-076	55.2848	Erwinia_phage_vB_EamP-S6
Salmonella_phage_FSL_SP-076	35.7894	Achromobacter_phage_JWAlpha
Salmonella_phage_FSL_SP-076	44.574	Escherichia_phage_ECBP1
Salmonella_phage_FSL_SP-076	41.8441	Escherichia_phage_vB_EcoP_PhAPEC5
Salmonella_phage_FSL_SP-076	67.5167	Enterobacter_phage_EcP1
Salmonella_phage_FSL_SP-076	44.1891	Shigella_phage_pSb-1
Salmonella_phage_FSL_SP-076	42.4483	Escherichia_phage_vB_EcoP_G7C
Salmonella_phage_FSL_SP-076	42.8457	Erwinia_phage_Ea9-2
Salmonella_phage_FSL_SP-076	41.8441	Escherichia_phage_vB_EcoP_PhAPEC7
Salmonella_phage_FSL_SP-076	32.3626	Sulfitobacter_phage_EE36phi1
Salmonella_phage_FSL_SP-076	229.194	Salmonella_phage_FSL_SP-058
Silicibacter_phage_DSS3phi2	35.2301	Enterobacter_phage_EcP1
Silicibacter_phage_DSS3phi2	33.7227	Delftia_phage_RG-2014
Silicibacter_phage_DSS3phi2	32.1155	Salmonella_phage_FSL_SP-076
Silicibacter_phage_DSS3phi2	41.994	Escherichia_phage_vB_EcoP_PhAPEC7
Silicibacter_phage_DSS3phi2	45.542	Erwinia_phage_Ea9-2
Silicibacter_phage_DSS3phi2	199.049	Sulfitobacter_phage_EE36phi1
Silicibacter_phage_DSS3phi2	42.5983	Escherichia_phage_vB_EcoP_G7C
Silicibacter_phage_DSS3phi2	39.4132	Shigella_phage_pSb-1
Silicibacter_phage_DSS3phi2	41.994	Escherichia_phage_vB_EcoP_PhAPEC5
Silicibacter_phage_DSS3phi2	31.1287	Erwinia_phage_vB_EamP-S6
Silicibacter_phage_DSS3phi2	45.9679	Achromobacter_phage_JWAlpha
Silicibacter_phage_DSS3phi2	13.6977	Alteromonas_phage_vB_AmaP_AD45-P1
Silicibacter_phage_DSS3phi2	31.6482	Salmonella_phage_FSL_SP-058
Silicibacter_phage_DSS3phi2	42.1418	Escherichia_phage_ECBP1
Silicibacter_phage_DSS3phi2	30.042	Vibrio_phage_JA-1
Achromobacter_phage_phiAxp-3	73.8989	Delftia_phage_RG-2014
Achromobacter_phage_phiAxp-3	90.495	Erwinia_phage_Ea9-2
Achromobacter_phage_phiAxp-3	84.2842	Escherichia_phage_vB_EcoP_PhAPEC5
Achromobacter_phage_phiAxp-3	48.0242	Sulfitobacter_phage_EE36phi1
Achromobacter_phage_phiAxp-3	32.6062	Vibrio_phage_JA-1
Achromobacter_phage_phiAxp-3	82.4642	Shigella_phage_pSb-1
Achromobacter_phage_phiAxp-3	87.6264	Escherichia_phage_ECBP1
Achromobacter_phage_phiAxp-3	91.6436	Escherichia_phage_vB_EcoP_G7C
Achromobacter_phage_phiAxp-3	37.8944	Enterobacter_phage_EcP1
Achromobacter_phage_phiAxp-3	43.1123	Erwinia_phage_vB_EamP-S6
Achromobacter_phage_phiAxp-3	13.7728	Alteromonas_phage_vB_AmaP_AD45-P1
Achromobacter_phage_phiAxp-3	37.1982	Salmonella_phage_FSL_SP-076
Achromobacter_phage_phiAxp-3	47.6862	Silicibacter_phage_DSS3phi2
Achromobacter_phage_phiAxp-3	36.676	Salmonella_phage_FSL_SP-058
Achromobacter_phage_phiAxp-3	90.4295	Escherichia_phage_vB_EcoP_PhAPEC7
Achromobacter_phage_phiAxp-3	162.893	Achromobacter_phage_JWAlpha
Escherichia_phage_N4	134.187	Escherichia_phage_vB_EcoP_PhAPEC7
Escherichia_phage_N4	125.038	Escherichia_phage_vB_EcoP_G7C
Escherichia_phage_N4	79.1078	Delftia_phage_RG-2014
Escherichia_phage_N4	112.68	Erwinia_phage_Ea9-2
Escherichia_phage_N4	39.0705	Enterobacter_phage_EcP1
Escherichia_phage_N4	40.9696	Salmonella_phage_FSL_SP-076
Escherichia_phage_N4	46.4218	Silicibacter_phage_DSS3phi2
Escherichia_phage_N4	52.2322	Erwinia_phage_vB_EamP-S6
Escherichia_phage_N4	40.4192	Salmonella_phage_FSL_SP-058
Escherichia_phage_N4	103.68	Achromobacter_phage_JWAlpha
Escherichia_phage_N4	110.626	Achromobacter_phage_phiAxp-3
Escherichia_phage_N4	123.423	Shigella_phage_pSb-1
Escherichia_phage_N4	33.6566	Vibrio_phage_JA-1
Escherichia_phage_N4	130.972	Escherichia_phage_ECBP1
Escherichia_phage_N4	46.7441	Sulfitobacter_phage_EE36phi1
Escherichia_phage_N4	130.544	Escherichia_phage_vB_EcoP_PhAPEC5
Escherichia_phage_N4	18.5691	Alteromonas_phage_vB_AmaP_AD45-P1
Vibrio_phage_phi_1	27.2513	Escherichia_phage_vB_EcoP_G7C
Vibrio_phage_phi_1	148.27	Vibrio_phage_JA-1
Vibrio_phage_phi_1	30.5984	Delftia_phage_RG-2014
Vibrio_phage_phi_1	25.0108	Sulfitobacter_phage_EE36phi1
Vibrio_phage_phi_1	25.652	Erwinia_phage_Ea9-2
Vibrio_phage_phi_1	29.1587	Salmonella_phage_FSL_SP-076
Vibrio_phage_phi_1	29.78	Enterobacter_phage_EcP1
Vibrio_phage_phi_1	24.7924	Silicibacter_phage_DSS3phi2
Vibrio_phage_phi_1	26.793	Escherichia_phage_vB_EcoP_PhAPEC7
Vibrio_phage_phi_1	28.1216	Escherichia_phage_N4
Vibrio_phage_phi_1	28.143	Achromobacter_phage_JWAlpha
Vibrio_phage_phi_1	28.6923	Salmonella_phage_FSL_SP-058
Vibrio_phage_phi_1	26.9533	Shigella_phage_pSb-1
Vibrio_phage_phi_1	27.1343	Achromobacter_phage_phiAxp-3
Vibrio_phage_phi_1	26.9052	Escherichia_phage_ECBP1
Vibrio_phage_phi_1	26.793	Escherichia_phage_vB_EcoP_PhAPEC5
Vibrio_phage_phi_1	11.873	Alteromonas_phage_vB_AmaP_AD45-P1
Vibrio_phage_phi_1	25.9097	Erwinia_phage_vB_EamP-S6
Enterobacter_phage_IME11	65.7611	Delftia_phage_RG-2014
Enterobacter_phage_IME11	34.0251	Enterobacter_phage_EcP1
Enterobacter_phage_IME11	105.332	Erwinia_phage_Ea9-2
Enterobacter_phage_IME11	40.7329	Salmonella_phage_FSL_SP-076
Enterobacter_phage_IME11	180.3	Escherichia_phage_vB_EcoP_PhAPEC5
Enterobacter_phage_IME11	167.432	Escherichia_phage_vB_EcoP_G7C
Enterobacter_phage_IME11	31.3447	Vibrio_phage_JA-1
Enterobacter_phage_IME11	40.8827	Silicibacter_phage_DSS3phi2
Enterobacter_phage_IME11	25.9476	Vibrio_phage_phi_1
Enterobacter_phage_IME11	196.694	Escherichia_phage_vB_EcoP_PhAPEC7
Enterobacter_phage_IME11	41.1892	Sulfitobacter_phage_EE36phi1
Enterobacter_phage_IME11	197.572	Escherichia_phage_ECBP1
Enterobacter_phage_IME11	40.1545	Salmonella_phage_FSL_SP-058
Enterobacter_phage_IME11	88.2326	Achromobacter_phage_phiAxp-3
Enterobacter_phage_IME11	14.9334	Alteromonas_phage_vB_AmaP_AD45-P1
Enterobacter_phage_IME11	88.0707	Achromobacter_phage_JWAlpha
Enterobacter_phage_IME11	41.397	Erwinia_phage_vB_EamP-S6
Enterobacter_phage_IME11	134.534	Escherichia_phage_N4
Enterobacter_phage_IME11	165.194	Shigella_phage_pSb-1
Enterobacteria_phage_Bp4	31.0306	Vibrio_phage_JA-1
Enterobacteria_phage_Bp4	211.945	Escherichia_phage_vB_EcoP_PhAPEC7
Enterobacteria_phage_Bp4	129.85	Escherichia_phage_N4
Enterobacteria_phage_Bp4	173.706	Escherichia_phage_vB_EcoP_G7C
Enterobacteria_phage_Bp4	170.681	Shigella_phage_pSb-1
Enterobacteria_phage_Bp4	42.8457	Salmonella_phage_FSL_SP-076
Enterobacteria_phage_Bp4	188.705	Enterobacter_phage_IME11
Enterobacteria_phage_Bp4	42.2385	Salmonella_phage_FSL_SP-058
Enterobacteria_phage_Bp4	40.9719	Erwinia_phage_vB_EamP-S6
Enterobacteria_phage_Bp4	14.7233	Alteromonas_phage_vB_AmaP_AD45-P1
Enterobacteria_phage_Bp4	25.652	Vibrio_phage_phi_1
Enterobacteria_phage_Bp4	40.4952	Silicibacter_phage_DSS3phi2
Enterobacteria_phage_Bp4	43.325	Sulfitobacter_phage_EE36phi1
Enterobacteria_phage_Bp4	227.06	Escherichia_phage_ECBP1
Enterobacteria_phage_Bp4	98.3187	Erwinia_phage_Ea9-2
Enterobacteria_phage_Bp4	38.6098	Enterobacter_phage_EcP1
Enterobacteria_phage_Bp4	62.4606	Delftia_phage_RG-2014
Enterobacteria_phage_Bp4	203.204	Escherichia_phage_vB_EcoP_PhAPEC5
Enterobacteria_phage_Bp4	84.4867	Achromobacter_phage_phiAxp-3
Enterobacteria_phage_Bp4	87.289	Achromobacter_phage_JWAlpha
Dinoroseobacter_phage_DFL12phi1	29.4873	Vibrio_phage_JA-1
Dinoroseobacter_phage_DFL12phi1	43.8111	Escherichia_phage_vB_EcoP_PhAPEC5
Dinoroseobacter_phage_DFL12phi1	154.687	Sulfitobacter_phage_EE36phi1
Dinoroseobacter_phage_DFL12phi1	45.6563	Escherichia_phage_N4
Dinoroseobacter_phage_DFL12phi1	30.5076	Erwinia_phage_vB_EamP-S6
Dinoroseobacter_phage_DFL12phi1	42.6449	Enterobacter_phage_IME11
Dinoroseobacter_phage_DFL12phi1	42.2385	Enterobacteria_phage_Bp4
Dinoroseobacter_phage_DFL12phi1	41.1042	Shigella_phage_pSb-1
Dinoroseobacter_phage_DFL12phi1	32.1496	Enterobacter_phage_EcP1
Dinoroseobacter_phage_DFL12phi1	43.9663	Escherichia_phage_ECBP1
Dinoroseobacter_phage_DFL12phi1	45.166	Achromobacter_phage_JWAlpha
Dinoroseobacter_phage_DFL12phi1	35.5085	Delftia_phage_RG-2014
Dinoroseobacter_phage_DFL12phi1	31.0601	Salmonella_phage_FSL_SP-058
Dinoroseobacter_phage_DFL12phi1	13.3366	Alteromonas_phage_vB_AmaP_AD45-P1
Dinoroseobacter_phage_DFL12phi1	43.8111	Escherichia_phage_vB_EcoP_PhAPEC7
Dinoroseobacter_phage_DFL12phi1	153.499	Silicibacter_phage_DSS3phi2
Dinoroseobacter_phage_DFL12phi1	46.8838	Achromobacter_phage_phiAxp-3
Dinoroseobacter_phage_DFL12phi1	31.5273	Salmonella_phage_FSL_SP-076
Dinoroseobacter_phage_DFL12phi1	44.7402	Erwinia_phage_Ea9-2
Dinoroseobacter_phage_DFL12phi1	24.2722	Vibrio_phage_phi_1
Dinoroseobacter_phage_DFL12phi1	44.4458	Escherichia_phage_vB_EcoP_G7C
Escherichia_phage_Pollock	54.6868	Erwinia_phage_vB_EamP-S6
Escherichia_phage_Pollock	44.115	Escherichia_phage_ECBP1
Escherichia_phage_Pollock	43.7084	Shigella_phage_pSb-1
Escherichia_phage_Pollock	35.6362	Delftia_phage_RG-2014
Escherichia_phage_Pollock	170.146	Salmonella_phage_FSL_SP-058
Escherichia_phage_Pollock	43.9598	Escherichia_phage_vB_EcoP_PhAPEC5
Escherichia_phage_Pollock	13.407	Alteromonas_phage_vB_AmaP_AD45-P1
Escherichia_phage_Pollock	164.852	Salmonella_phage_FSL_SP-076
Escherichia_phage_Pollock	31.0724	Vibrio_phage_phi_1
Escherichia_phage_Pollock	32.0097	Sulfitobacter_phage_EE36phi1
Escherichia_phage_Pollock	39.9086	Erwinia_phage_Ea9-2
Escherichia_phage_Pollock	42.3871	Enterobacteria_phage_Bp4
Escherichia_phage_Pollock	37.8298	Enterobacter_phage_IME11
Escherichia_phage_Pollock	36.943	Vibrio_phage_JA-1
Escherichia_phage_Pollock	43.9598	Escherichia_phage_vB_EcoP_PhAPEC7
Escherichia_phage_Pollock	35.3953	Achromobacter_phage_JWAlpha
Escherichia_phage_Pollock	69.7507	Enterobacter_phage_EcP1
Escherichia_phage_Pollock	31.7626	Silicibacter_phage_DSS3phi2
Escherichia_phage_Pollock	36.8039	Achromobacter_phage_phiAxp-3
Escherichia_phage_Pollock	44.5945	Escherichia_phage_vB_EcoP_G7C
Escherichia_phage_Pollock	43.1626	Escherichia_phage_N4
Escherichia_phage_Pollock	31.1745	Dinoroseobacter_phage_DFL12phi1
Sulfitobacter_phage_phiCB2047-B	37.0197	Delftia_phage_RG-2014
Sulfitobacter_phage_phiCB2047-B	42.9426	Escherichia_phage_vB_EcoP_PhAPEC5
Sulfitobacter_phage_phiCB2047-B	105.655	Silicibacter_phage_DSS3phi2
Sulfitobacter_phage_phiCB2047-B	41.4433	Enterobacteria_phage_Bp4
Sulfitobacter_phage_phiCB2047-B	44.4063	Achromobacter_phage_JWAlpha
Sulfitobacter_phage_phiCB2047-B	40.3608	Shigella_phage_pSb-1
Sulfitobacter_phage_phiCB2047-B	32.5263	Escherichia_phage_Pollock
Sulfitobacter_phage_phiCB2047-B	46.0459	Achromobacter_phage_phiAxp-3
Sulfitobacter_phage_phiCB2047-B	44.6991	Escherichia_phage_N4
Sulfitobacter_phage_phiCB2047-B	31.9359	Erwinia_phage_vB_EamP-S6
Sulfitobacter_phage_phiCB2047-B	33.502	Enterobacter_phage_EcP1
Sulfitobacter_phage_phiCB2047-B	32.4117	Salmonella_phage_FSL_SP-058
Sulfitobacter_phage_phiCB2047-B	43.0904	Escherichia_phage_ECBP1
Sulfitobacter_phage_phiCB2047-B	32.8793	Salmonella_phage_FSL_SP-076
Sulfitobacter_phage_phiCB2047-B	30.7617	Vibrio_phage_JA-1
Sulfitobacter_phage_phiCB2047-B	14.1647	Alteromonas_phage_vB_AmaP_AD45-P1
Sulfitobacter_phage_phiCB2047-B	41.831	Enterobacter_phage_IME11
Sulfitobacter_phage_phiCB2047-B	25.4671	Vibrio_phage_phi_1
Sulfitobacter_phage_phiCB2047-B	106.366	Sulfitobacter_phage_EE36phi1
Sulfitobacter_phage_phiCB2047-B	42.9426	Escherichia_phage_vB_EcoP_PhAPEC7
Sulfitobacter_phage_phiCB2047-B	46.5877	Erwinia_phage_Ea9-2
Sulfitobacter_phage_phiCB2047-B	43.5471	Escherichia_phage_vB_EcoP_G7C
Sulfitobacter_phage_phiCB2047-B	110.592	Dinoroseobacter_phage_DFL12phi1
Vibrio_phage_VBP47	22.4539	Sulfitobacter_phage_EE36phi1
Vibrio_phage_VBP47	22.1493	Salmonella_phage_FSL_SP-076
Vibrio_phage_VBP47	21.0449	Erwinia_phage_Ea9-2
Vibrio_phage_VBP47	21.4847	Delftia_phage_RG-2014
Vibrio_phage_VBP47	23.2188	Escherichia_phage_N4
Vibrio_phage_VBP47	26.8539	Escherichia_phage_vB_EcoP_G7C
Vibrio_phage_VBP47	24.8611	Enterobacter_phage_EcP1
Vibrio_phage_VBP47	22.0505	Escherichia_phage_vB_EcoP_PhAPEC7
Vibrio_phage_VBP47	21.3056	Enterobacter_phage_IME11
Vibrio_phage_VBP47	24.6364	Vibrio_phage_JA-1
Vibrio_phage_VBP47	20.1166	Silicibacter_phage_DSS3phi2
Vibrio_phage_VBP47	25.2551	Enterobacteria_phage_Bp4
Vibrio_phage_VBP47	22.881	Sulfitobacter_phage_phiCB2047-B
Vibrio_phage_VBP47	21.7621	Dinoroseobacter_phage_DFL12phi1
Vibrio_phage_VBP47	11.6117	Alteromonas_phage_vB_AmaP_AD45-P1
Vibrio_phage_VBP47	23.8393	Vibrio_phage_phi_1
Vibrio_phage_VBP47	26.5336	Shigella_phage_pSb-1
Vibrio_phage_VBP47	24.3112	Escherichia_phage_ECBP1
Vibrio_phage_VBP47	24.2058	Escherichia_phage_vB_EcoP_PhAPEC5
Vibrio_phage_VBP47	21.7621	Salmonella_phage_FSL_SP-058
Vibrio_phage_VBP47	23.9993	Escherichia_phage_Pollock
Vibrio_phage_VBP47	22.3509	Achromobacter_phage_phiAxp-3
Vibrio_phage_VBP47	19.444	Erwinia_phage_vB_EamP-S6
Vibrio_phage_VBP47	23.4112	Achromobacter_phage_JWAlpha
Pseudoalteromonas_phage_pYD6-A	25.9048	Vibrio_phage_JA-1
Pseudoalteromonas_phage_pYD6-A	22.2338	Erwinia_phage_Ea9-2
Pseudoalteromonas_phage_pYD6-A	23.6447	Sulfitobacter_phage_EE36phi1
Pseudoalteromonas_phage_pYD6-A	23.5417	Achromobacter_phage_phiAxp-3
Pseudoalteromonas_phage_pYD6-A	25.4737	Escherichia_phage_vB_EcoP_PhAPEC7
Pseudoalteromonas_phage_pYD6-A	22.9521	Salmonella_phage_FSL_SP-058
Pseudoalteromonas_phage_pYD6-A	23.3398	Salmonella_phage_FSL_SP-076
Pseudoalteromonas_phage_pYD6-A	25.1821	Vibrio_phage_phi_1
Pseudoalteromonas_phage_pYD6-A	25.4737	Escherichia_phage_vB_EcoP_PhAPEC5
Pseudoalteromonas_phage_pYD6-A	10.6439	Alteromonas_phage_vB_AmaP_AD45-P1
Pseudoalteromonas_phage_pYD6-A	25.7722	Shigella_phage_pSb-1
Pseudoalteromonas_phage_pYD6-A	24.4106	Escherichia_phage_N4
Pseudoalteromonas_phage_pYD6-A	22.6743	Delftia_phage_RG-2014
Pseudoalteromonas_phage_pYD6-A	26.6	Enterobacteria_phage_Bp4
Pseudoalteromonas_phage_pYD6-A	26.1297	Enterobacter_phage_EcP1
Pseudoalteromonas_phage_pYD6-A	25.5792	Escherichia_phage_ECBP1
Pseudoalteromonas_phage_pYD6-A	20.6303	Erwinia_phage_vB_EamP-S6
Pseudoalteromonas_phage_pYD6-A	21.2306	Silicibacter_phage_DSS3phi2
Pseudoalteromonas_phage_pYD6-A	22.4949	Enterobacter_phage_IME11
Pseudoalteromonas_phage_pYD6-A	25.9048	Escherichia_phage_vB_EcoP_G7C
Pseudoalteromonas_phage_pYD6-A	24.678	Achromobacter_phage_JWAlpha
Pseudoalteromonas_phage_pYD6-A	24.0724	Sulfitobacter_phage_phiCB2047-B
Pseudoalteromonas_phage_pYD6-A	22.9521	Dinoroseobacter_phage_DFL12phi1
Pseudoalteromonas_phage_pYD6-A	25.2669	Escherichia_phage_Pollock
Pseudoalteromonas_phage_pYD6-A	176.635	Vibrio_phage_VBP47
Vibrio_phage_VBP32	19.444	Erwinia_phage_vB_EamP-S6
Vibrio_phage_VBP32	22.0505	Escherichia_phage_vB_EcoP_PhAPEC7
Vibrio_phage_VBP32	23.9993	Escherichia_phage_Pollock
Vibrio_phage_VBP32	24.3112	Escherichia_phage_ECBP1
Vibrio_phage_VBP32	26.5336	Shigella_phage_pSb-1
Vibrio_phage_VBP32	21.0449	Erwinia_phage_Ea9-2
Vibrio_phage_VBP32	22.3509	Achromobacter_phage_phiAxp-3
Vibrio_phage_VBP32	24.6364	Vibrio_phage_JA-1
Vibrio_phage_VBP32	24.8611	Enterobacter_phage_EcP1
Vibrio_phage_VBP32	23.8393	Vibrio_phage_phi_1
Vibrio_phage_VBP32	21.7621	Salmonella_phage_FSL_SP-058
Vibrio_phage_VBP32	20.1166	Silicibacter_phage_DSS3phi2
Vibrio_phage_VBP32	11.6117	Alteromonas_phage_vB_AmaP_AD45-P1
Vibrio_phage_VBP32	23.4112	Achromobacter_phage_JWAlpha
Vibrio_phage_VBP32	22.1493	Salmonella_phage_FSL_SP-076
Vibrio_phage_VBP32	21.3056	Enterobacter_phage_IME11
Vibrio_phage_VBP32	21.4847	Delftia_phage_RG-2014
Vibrio_phage_VBP32	22.4539	Sulfitobacter_phage_EE36phi1
Vibrio_phage_VBP32	26.8539	Escherichia_phage_vB_EcoP_G7C
Vibrio_phage_VBP32	23.2188	Escherichia_phage_N4
Vibrio_phage_VBP32	24.2058	Escherichia_phage_vB_EcoP_PhAPEC5
Vibrio_phage_VBP32	25.2551	Enterobacteria_phage_Bp4
Vibrio_phage_VBP32	22.881	Sulfitobacter_phage_phiCB2047-B
Vibrio_phage_VBP32	21.7621	Dinoroseobacter_phage_DFL12phi1
Vibrio_phage_VBP32	300	Vibrio_phage_VBP47
Vibrio_phage_VBP32	180.177	Pseudoalteromonas_phage_pYD6-A
Pseudomonas_phage_YH30	30.7257	Delftia_phage_RG-2014
Pseudomonas_phage_YH30	26.7895	Salmonella_phage_FSL_SP-076
Pseudomonas_phage_YH30	29.727	Enterobacter_phage_EcP1
Pseudomonas_phage_YH30	36.2705	Escherichia_phage_vB_EcoP_PhAPEC7
Pseudomonas_phage_YH30	39.7671	Erwinia_phage_Ea9-2
Pseudomonas_phage_YH30	35.2676	Enterobacter_phage_IME11
Pseudomonas_phage_YH30	34.338	Escherichia_phage_vB_EcoP_G7C
Pseudomonas_phage_YH30	40.4192	Escherichia_phage_N4
Pseudomonas_phage_YH30	28.8081	Escherichia_phage_Pollock
Pseudomonas_phage_YH30	36.4037	Escherichia_phage_ECBP1
Pseudomonas_phage_YH30	28.2719	Erwinia_phage_vB_EamP-S6
Pseudomonas_phage_YH30	39.1791	Achromobacter_phage_phiAxp-3
Pseudomonas_phage_YH30	24.2722	Vibrio_phage_phi_1
Pseudomonas_phage_YH30	36.5389	Silicibacter_phage_DSS3phi2
Pseudomonas_phage_YH30	28.7002	Salmonella_phage_FSL_SP-058
Pseudomonas_phage_YH30	36.8151	Sulfitobacter_phage_EE36phi1
Pseudomonas_phage_YH30	24.7803	Vibrio_phage_JA-1
Pseudomonas_phage_YH30	34.9174	Enterobacteria_phage_Bp4
Pseudomonas_phage_YH30	31.0601	Dinoroseobacter_phage_DFL12phi1
Pseudomonas_phage_YH30	32.4117	Sulfitobacter_phage_phiCB2047-B
Pseudomonas_phage_YH30	36.2705	Escherichia_phage_vB_EcoP_PhAPEC5
Pseudomonas_phage_YH30	31.6123	Shigella_phage_pSb-1
Pseudomonas_phage_YH30	37.6952	Achromobacter_phage_JWAlpha
Pseudomonas_phage_YH30	9.53662	Alteromonas_phage_vB_AmaP_AD45-P1
Pseudomonas_phage_YH30	21.7621	Vibrio_phage_VBP47
Pseudomonas_phage_YH30	21.7621	Vibrio_phage_VBP32
Pseudomonas_phage_YH30	22.9521	Pseudoalteromonas_phage_pYD6-A
Pseudomonas_phage_LUZ7	29.5956	Erwinia_phage_Ea9-2
Pseudomonas_phage_LUZ7	27.0931	Enterobacter_phage_EcP1
Pseudomonas_phage_LUZ7	28.6191	Escherichia_phage_vB_EcoP_PhAPEC5
Pseudomonas_phage_LUZ7	28.6191	Escherichia_phage_vB_EcoP_PhAPEC7
Pseudomonas_phage_LUZ7	26.0684	Dinoroseobacter_phage_DFL12phi1
Pseudomonas_phage_LUZ7	22.4539	Vibrio_phage_JA-1
Pseudomonas_phage_LUZ7	26.0684	Salmonella_phage_FSL_SP-058
Pseudomonas_phage_LUZ7	27.4096	Enterobacteria_phage_Bp4
Pseudomonas_phage_LUZ7	28.8588	Silicibacter_phage_DSS3phi2
Pseudomonas_phage_LUZ7	27.7228	Enterobacter_phage_IME11
Pseudomonas_phage_LUZ7	24.3112	Salmonella_phage_FSL_SP-076
Pseudomonas_phage_LUZ7	21.8004	Vibrio_phage_phi_1
Pseudomonas_phage_LUZ7	26.5336	Shigella_phage_pSb-1
Pseudomonas_phage_LUZ7	28.9812	Achromobacter_phage_phiAxp-3
Pseudomonas_phage_LUZ7	30.0293	Escherichia_phage_N4
Pseudomonas_phage_LUZ7	29.1053	Sulfitobacter_phage_EE36phi1
Pseudomonas_phage_LUZ7	28.7381	Escherichia_phage_ECBP1
Pseudomonas_phage_LUZ7	26.176	Escherichia_phage_Pollock
Pseudomonas_phage_LUZ7	25.7538	Delftia_phage_RG-2014
Pseudomonas_phage_LUZ7	8.09742	Alteromonas_phage_vB_AmaP_AD45-P1
Pseudomonas_phage_LUZ7	27.3395	Sulfitobacter_phage_phiCB2047-B
Pseudomonas_phage_LUZ7	27.7228	Achromobacter_phage_JWAlpha
Pseudomonas_phage_LUZ7	29.1053	Escherichia_phage_vB_EcoP_G7C
Pseudomonas_phage_LUZ7	23.4433	Erwinia_phage_vB_EamP-S6
Pseudomonas_phage_LUZ7	19.444	Vibrio_phage_VBP32
Pseudomonas_phage_LUZ7	20.6303	Pseudoalteromonas_phage_pYD6-A
Pseudomonas_phage_LUZ7	19.444	Vibrio_phage_VBP47
Pseudomonas_phage_LUZ7	95.5019	Pseudomonas_phage_YH30
Pseudomonas_phage_Pa2	39.7717	Escherichia_phage_N4
Pseudomonas_phage_Pa2	26.3013	Salmonella_phage_FSL_SP-076
Pseudomonas_phage_Pa2	30.1756	Delftia_phage_RG-2014
Pseudomonas_phage_Pa2	35.6562	Escherichia_phage_vB_EcoP_PhAPEC7
Pseudomonas_phage_Pa2	31.031	Shigella_phage_pSb-1
Pseudomonas_phage_Pa2	27.7228	Erwinia_phage_vB_EamP-S6
Pseudomonas_phage_Pa2	34.6536	Enterobacter_phage_IME11
Pseudomonas_phage_Pa2	35.6562	Escherichia_phage_vB_EcoP_PhAPEC5
Pseudomonas_phage_Pa2	23.7851	Vibrio_phage_phi_1
Pseudomonas_phage_Pa2	36.2007	Sulfitobacter_phage_EE36phi1
Pseudomonas_phage_Pa2	35.7894	Escherichia_phage_ECBP1
Pseudomonas_phage_Pa2	34.3035	Enterobacteria_phage_Bp4
Pseudomonas_phage_Pa2	33.7558	Escherichia_phage_vB_EcoP_G7C
Pseudomonas_phage_Pa2	9.25428	Alteromonas_phage_vB_AmaP_AD45-P1
Pseudomonas_phage_Pa2	28.1813	Salmonella_phage_FSL_SP-058
Pseudomonas_phage_Pa2	29.2077	Enterobacter_phage_EcP1
Pseudomonas_phage_Pa2	35.9245	Silicibacter_phage_DSS3phi2
Pseudomonas_phage_Pa2	24.3223	Vibrio_phage_JA-1
Pseudomonas_phage_Pa2	39.0873	Erwinia_phage_Ea9-2
Pseudomonas_phage_Pa2	28.2891	Escherichia_phage_Pollock
Pseudomonas_phage_Pa2	37.0485	Achromobacter_phage_JWAlpha
Pseudomonas_phage_Pa2	31.8611	Sulfitobacter_phage_phiCB2047-B
Pseudomonas_phage_Pa2	30.5099	Dinoroseobacter_phage_DFL12phi1
Pseudomonas_phage_Pa2	38.532	Achromobacter_phage_phiAxp-3
Pseudomonas_phage_Pa2	21.3056	Vibrio_phage_VBP47
Pseudomonas_phage_Pa2	22.4949	Pseudoalteromonas_phage_pYD6-A
Pseudomonas_phage_Pa2	21.3056	Vibrio_phage_VBP32
Pseudomonas_phage_Pa2	99.7312	Pseudomonas_phage_LUZ7
Pseudomonas_phage_Pa2	254.988	Pseudomonas_phage_YH30
Pseudomonas_phage_KPP21	27.8884	Enterobacter_phage_IME11
Pseudomonas_phage_KPP21	29.2711	Escherichia_phage_vB_EcoP_G7C
Pseudomonas_phage_KPP21	25.9102	Delftia_phage_RG-2014
Pseudomonas_phage_KPP21	27.2497	Enterobacter_phage_EcP1
Pseudomonas_phage_KPP21	24.4588	Salmonella_phage_FSL_SP-076
Pseudomonas_phage_KPP21	28.7849	Escherichia_phage_vB_EcoP_PhAPEC7
Pseudomonas_phage_KPP21	29.7704	Erwinia_phage_Ea9-2
Pseudomonas_phage_KPP21	22.5925	Vibrio_phage_JA-1
Pseudomonas_phage_KPP21	27.8884	Achromobacter_phage_JWAlpha
Pseudomonas_phage_KPP21	29.2711	Sulfitobacter_phage_EE36phi1
Pseudomonas_phage_KPP21	26.2249	Dinoroseobacter_phage_DFL12phi1
Pseudomonas_phage_KPP21	27.5751	Enterobacteria_phage_Bp4
Pseudomonas_phage_KPP21	21.9475	Vibrio_phage_phi_1
Pseudomonas_phage_KPP21	23.5994	Erwinia_phage_vB_EamP-S6
Pseudomonas_phage_KPP21	8.18347	Alteromonas_phage_vB_AmaP_AD45-P1
Pseudomonas_phage_KPP21	26.699	Shigella_phage_pSb-1
Pseudomonas_phage_KPP21	29.1469	Achromobacter_phage_phiAxp-3
Pseudomonas_phage_KPP21	28.7849	Escherichia_phage_vB_EcoP_PhAPEC5
Pseudomonas_phage_KPP21	26.3326	Escherichia_phage_Pollock
Pseudomonas_phage_KPP21	30.1952	Escherichia_phage_N4
Pseudomonas_phage_KPP21	26.2249	Salmonella_phage_FSL_SP-058
Pseudomonas_phage_KPP21	29.0245	Silicibacter_phage_DSS3phi2
Pseudomonas_phage_KPP21	27.4962	Sulfitobacter_phage_phiCB2047-B
Pseudomonas_phage_KPP21	28.9039	Escherichia_phage_ECBP1
Pseudomonas_phage_KPP21	20.7686	Pseudoalteromonas_phage_pYD6-A
Pseudomonas_phage_KPP21	19.582	Vibrio_phage_VBP47
Pseudomonas_phage_KPP21	19.582	Vibrio_phage_VBP32
Pseudomonas_phage_KPP21	276.359	Pseudomonas_phage_LUZ7
Pseudomonas_phage_KPP21	98.9023	Pseudomonas_phage_YH30
Pseudomonas_phage_KPP21	103.157	Pseudomonas_phage_Pa2
Pseudomonas_phage_YH6	30.2828	Delftia_phage_RG-2014
Pseudomonas_phage_YH6	39.2197	Erwinia_phage_Ea9-2
Pseudomonas_phage_YH6	26.3965	Salmonella_phage_FSL_SP-076
Pseudomonas_phage_YH6	29.3089	Enterobacter_phage_EcP1
Pseudomonas_phage_YH6	35.7759	Escherichia_phage_vB_EcoP_PhAPEC5
Pseudomonas_phage_YH6	9.30939	Alteromonas_phage_vB_AmaP_AD45-P1
Pseudomonas_phage_YH6	37.1745	Achromobacter_phage_JWAlpha
Pseudomonas_phage_YH6	35.7759	Escherichia_phage_vB_EcoP_PhAPEC7
Pseudomonas_phage_YH6	34.7732	Enterobacter_phage_IME11
Pseudomonas_phage_YH6	24.4117	Vibrio_phage_JA-1
Pseudomonas_phage_YH6	34.4232	Enterobacteria_phage_Bp4
Pseudomonas_phage_YH6	23.8801	Vibrio_phage_phi_1
Pseudomonas_phage_YH6	28.2824	Salmonella_phage_FSL_SP-058
Pseudomonas_phage_YH6	35.9091	Escherichia_phage_ECBP1
Pseudomonas_phage_YH6	30.6171	Dinoroseobacter_phage_DFL12phi1
Pseudomonas_phage_YH6	36.3204	Sulfitobacter_phage_EE36phi1
Pseudomonas_phage_YH6	36.0442	Silicibacter_phage_DSS3phi2
Pseudomonas_phage_YH6	38.6581	Achromobacter_phage_phiAxp-3
Pseudomonas_phage_YH6	31.9684	Sulfitobacter_phage_phiCB2047-B
Pseudomonas_phage_YH6	31.1443	Shigella_phage_pSb-1
Pseudomonas_phage_YH6	33.8693	Escherichia_phage_vB_EcoP_G7C
Pseudomonas_phage_YH6	39.8978	Escherichia_phage_N4
Pseudomonas_phage_YH6	27.8298	Erwinia_phage_vB_EamP-S6
Pseudomonas_phage_YH6	28.3903	Escherichia_phage_Pollock
Pseudomonas_phage_YH6	21.3946	Vibrio_phage_VBP32
Pseudomonas_phage_YH6	22.5841	Pseudoalteromonas_phage_pYD6-A
Pseudomonas_phage_YH6	21.3946	Vibrio_phage_VBP47
Pseudomonas_phage_YH6	97.1301	Pseudomonas_phage_LUZ7
Pseudomonas_phage_YH6	240.168	Pseudomonas_phage_YH30
Pseudomonas_phage_YH6	97.5884	Pseudomonas_phage_KPP21
Pseudomonas_phage_YH6	249.279	Pseudomonas_phage_Pa2
Acinetobacter_phage_Presley	29.5439	Enterobacter_phage_IME11
Acinetobacter_phage_Presley	29.2302	Erwinia_phage_Ea9-2
Acinetobacter_phage_Presley	28.5754	Escherichia_phage_vB_EcoP_G7C
Acinetobacter_phage_Presley	30.4416	Escherichia_phage_vB_EcoP_PhAPEC7
Acinetobacter_phage_Presley	26.4824	Enterobacter_phage_EcP1
Acinetobacter_phage_Presley	25.9318	Salmonella_phage_FSL_SP-076
Acinetobacter_phage_Presley	29.7597	Delftia_phage_RG-2014
Acinetobacter_phage_Presley	10.8687	Alteromonas_phage_vB_AmaP_AD45-P1
Acinetobacter_phage_Presley	29.2302	Enterobacteria_phage_Bp4
Acinetobacter_phage_Presley	28.5754	Vibrio_phage_JA-1
Acinetobacter_phage_Presley	30.8041	Achromobacter_phage_phiAxp-3
Acinetobacter_phage_Presley	27.7277	Vibrio_phage_phi_1
Acinetobacter_phage_Presley	25.518	Salmonella_phage_FSL_SP-058
Acinetobacter_phage_Presley	26.0388	Silicibacter_phage_DSS3phi2
Acinetobacter_phage_Presley	26.2574	Sulfitobacter_phage_EE36phi1
Acinetobacter_phage_Presley	30.5607	Escherichia_phage_ECBP1
Acinetobacter_phage_Presley	30.4416	Escherichia_phage_vB_EcoP_PhAPEC5
Acinetobacter_phage_Presley	29.5439	Achromobacter_phage_JWAlpha
Acinetobacter_phage_Presley	26.7142	Sulfitobacter_phage_phiCB2047-B
Acinetobacter_phage_Presley	25.518	Dinoroseobacter_phage_DFL12phi1
Acinetobacter_phage_Presley	26.1461	Shigella_phage_pSb-1
Acinetobacter_phage_Presley	25.6194	Escherichia_phage_Pollock
Acinetobacter_phage_Presley	31.8534	Escherichia_phage_N4
Acinetobacter_phage_Presley	25.159	Erwinia_phage_vB_EamP-S6
Acinetobacter_phage_Presley	23.0428	Vibrio_phage_VBP32
Acinetobacter_phage_Presley	24.3091	Pseudoalteromonas_phage_pYD6-A
Acinetobacter_phage_Presley	23.0428	Vibrio_phage_VBP47
Acinetobacter_phage_Presley	33.9393	Pseudomonas_phage_LUZ7
Acinetobacter_phage_Presley	39.0938	Pseudomonas_phage_YH6
Acinetobacter_phage_Presley	34.1329	Pseudomonas_phage_KPP21
Acinetobacter_phage_Presley	38.9614	Pseudomonas_phage_Pa2
Acinetobacter_phage_Presley	39.6411	Pseudomonas_phage_YH30
Pseudomonas_phage_LIT1	28.2824	Salmonella_phage_FSL_SP-058
Pseudomonas_phage_LIT1	24.4117	Vibrio_phage_JA-1
Pseudomonas_phage_LIT1	39.2197	Erwinia_phage_Ea9-2
Pseudomonas_phage_LIT1	9.30939	Alteromonas_phage_vB_AmaP_AD45-P1
Pseudomonas_phage_LIT1	26.3965	Salmonella_phage_FSL_SP-076
Pseudomonas_phage_LIT1	36.3204	Sulfitobacter_phage_EE36phi1
Pseudomonas_phage_LIT1	35.9091	Escherichia_phage_ECBP1
Pseudomonas_phage_LIT1	35.7759	Escherichia_phage_vB_EcoP_PhAPEC7
Pseudomonas_phage_LIT1	23.8801	Vibrio_phage_phi_1
Pseudomonas_phage_LIT1	33.8693	Escherichia_phage_vB_EcoP_G7C
Pseudomonas_phage_LIT1	30.2828	Delftia_phage_RG-2014
Pseudomonas_phage_LIT1	27.8298	Erwinia_phage_vB_EamP-S6
Pseudomonas_phage_LIT1	39.8978	Escherichia_phage_N4
Pseudomonas_phage_LIT1	29.3089	Enterobacter_phage_EcP1
Pseudomonas_phage_LIT1	34.7732	Enterobacter_phage_IME11
Pseudomonas_phage_LIT1	36.0442	Silicibacter_phage_DSS3phi2
Pseudomonas_phage_LIT1	34.4232	Enterobacteria_phage_Bp4
Pseudomonas_phage_LIT1	35.7759	Escherichia_phage_vB_EcoP_PhAPEC5
Pseudomonas_phage_LIT1	31.1443	Shigella_phage_pSb-1
Pseudomonas_phage_LIT1	31.9684	Sulfitobacter_phage_phiCB2047-B
Pseudomonas_phage_LIT1	38.6581	Achromobacter_phage_phiAxp-3
Pseudomonas_phage_LIT1	37.1745	Achromobacter_phage_JWAlpha
Pseudomonas_phage_LIT1	30.6171	Dinoroseobacter_phage_DFL12phi1
Pseudomonas_phage_LIT1	28.3903	Escherichia_phage_Pollock
Pseudomonas_phage_LIT1	21.3946	Vibrio_phage_VBP47
Pseudomonas_phage_LIT1	21.3946	Vibrio_phage_VBP32
Pseudomonas_phage_LIT1	22.5841	Pseudoalteromonas_phage_pYD6-A
Pseudomonas_phage_LIT1	39.0938	Acinetobacter_phage_Presley
Pseudomonas_phage_LIT1	97.5884	Pseudomonas_phage_KPP21
Pseudomonas_phage_LIT1	250.46	Pseudomonas_phage_YH6
Pseudomonas_phage_LIT1	250.607	Pseudomonas_phage_YH30
Pseudomonas_phage_LIT1	97.1301	Pseudomonas_phage_LUZ7
Pseudomonas_phage_LIT1	254.448	Pseudomonas_phage_Pa2
Pseudomonas_phage_vB_PaeP_C2-10_Ab09	34.7064	Escherichia_phage_vB_EcoP_G7C
Pseudomonas_phage_vB_PaeP_C2-10_Ab09	35.6562	Enterobacter_phage_IME11
Pseudomonas_phage_vB_PaeP_C2-10_Ab09	37.736	Erwinia_phage_Ea9-2
Pseudomonas_phage_vB_PaeP_C2-10_Ab09	36.6593	Escherichia_phage_vB_EcoP_PhAPEC7
Pseudomonas_phage_vB_PaeP_C2-10_Ab09	30.0553	Enterobacter_phage_EcP1
Pseudomonas_phage_vB_PaeP_C2-10_Ab09	27.0981	Salmonella_phage_FSL_SP-076
Pseudomonas_phage_vB_PaeP_C2-10_Ab09	31.0736	Delftia_phage_RG-2014
Pseudomonas_phage_vB_PaeP_C2-10_Ab09	36.6593	Escherichia_phage_vB_EcoP_PhAPEC5
Pseudomonas_phage_vB_PaeP_C2-10_Ab09	38.2406	Escherichia_phage_N4
Pseudomonas_phage_vB_PaeP_C2-10_Ab09	35.306	Enterobacteria_phage_Bp4
Pseudomonas_phage_vB_PaeP_C2-10_Ab09	29.1362	Escherichia_phage_Pollock
Pseudomonas_phage_vB_PaeP_C2-10_Ab09	32.76	Sulfitobacter_phage_phiCB2047-B
Pseudomonas_phage_vB_PaeP_C2-10_Ab09	37.0649	Achromobacter_phage_phiAxp-3
Pseudomonas_phage_vB_PaeP_C2-10_Ab09	34.7064	Sulfitobacter_phage_EE36phi1
Pseudomonas_phage_vB_PaeP_C2-10_Ab09	31.4081	Dinoroseobacter_phage_DFL12phi1
Pseudomonas_phage_vB_PaeP_C2-10_Ab09	9.71467	Alteromonas_phage_vB_AmaP_AD45-P1
Pseudomonas_phage_vB_PaeP_C2-10_Ab09	25.0696	Vibrio_phage_JA-1
Pseudomonas_phage_vB_PaeP_C2-10_Ab09	29.0283	Salmonella_phage_FSL_SP-058
Pseudomonas_phage_vB_PaeP_C2-10_Ab09	34.4448	Silicibacter_phage_DSS3phi2
Pseudomonas_phage_vB_PaeP_C2-10_Ab09	35.6562	Achromobacter_phage_JWAlpha
Pseudomonas_phage_vB_PaeP_C2-10_Ab09	24.5801	Vibrio_phage_phi_1
Pseudomonas_phage_vB_PaeP_C2-10_Ab09	36.7926	Escherichia_phage_ECBP1
Pseudomonas_phage_vB_PaeP_C2-10_Ab09	31.9801	Shigella_phage_pSb-1
Pseudomonas_phage_vB_PaeP_C2-10_Ab09	28.6191	Erwinia_phage_vB_EamP-S6
Pseudomonas_phage_vB_PaeP_C2-10_Ab09	23.2409	Pseudoalteromonas_phage_pYD6-A
Pseudomonas_phage_vB_PaeP_C2-10_Ab09	22.0505	Vibrio_phage_VBP47
Pseudomonas_phage_vB_PaeP_C2-10_Ab09	22.0505	Vibrio_phage_VBP32
Pseudomonas_phage_vB_PaeP_C2-10_Ab09	93.5667	Pseudomonas_phage_LUZ7
Pseudomonas_phage_vB_PaeP_C2-10_Ab09	239.206	Pseudomonas_phage_YH6
Pseudomonas_phage_vB_PaeP_C2-10_Ab09	40.0717	Acinetobacter_phage_Presley
Pseudomonas_phage_vB_PaeP_C2-10_Ab09	93.9997	Pseudomonas_phage_KPP21
Pseudomonas_phage_vB_PaeP_C2-10_Ab09	227.974	Pseudomonas_phage_YH30
Pseudomonas_phage_vB_PaeP_C2-10_Ab09	233.146	Pseudomonas_phage_Pa2
Pseudomonas_phage_vB_PaeP_C2-10_Ab09	250.303	Pseudomonas_phage_LIT1
Pseudomonas_phage_DL64	29.3089	Enterobacter_phage_EcP1
Pseudomonas_phage_DL64	36.3204	Sulfitobacter_phage_EE36phi1
Pseudomonas_phage_DL64	35.9091	Escherichia_phage_ECBP1
Pseudomonas_phage_DL64	34.7732	Enterobacter_phage_IME11
Pseudomonas_phage_DL64	28.2824	Salmonella_phage_FSL_SP-058
Pseudomonas_phage_DL64	30.2828	Delftia_phage_RG-2014
Pseudomonas_phage_DL64	37.1745	Achromobacter_phage_JWAlpha
Pseudomonas_phage_DL64	36.0442	Silicibacter_phage_DSS3phi2
Pseudomonas_phage_DL64	9.30939	Alteromonas_phage_vB_AmaP_AD45-P1
Pseudomonas_phage_DL64	27.8298	Erwinia_phage_vB_EamP-S6
Pseudomonas_phage_DL64	28.3903	Escherichia_phage_Pollock
Pseudomonas_phage_DL64	39.8978	Escherichia_phage_N4
Pseudomonas_phage_DL64	31.9684	Sulfitobacter_phage_phiCB2047-B
Pseudomonas_phage_DL64	33.8693	Escherichia_phage_vB_EcoP_G7C
Pseudomonas_phage_DL64	34.4232	Enterobacteria_phage_Bp4
Pseudomonas_phage_DL64	23.8801	Vibrio_phage_phi_1
Pseudomonas_phage_DL64	35.7759	Escherichia_phage_vB_EcoP_PhAPEC5
Pseudomonas_phage_DL64	35.7759	Escherichia_phage_vB_EcoP_PhAPEC7
Pseudomonas_phage_DL64	26.3965	Salmonella_phage_FSL_SP-076
Pseudomonas_phage_DL64	31.1443	Shigella_phage_pSb-1
Pseudomonas_phage_DL64	39.2197	Erwinia_phage_Ea9-2
Pseudomonas_phage_DL64	38.6581	Achromobacter_phage_phiAxp-3
Pseudomonas_phage_DL64	24.4117	Vibrio_phage_JA-1
Pseudomonas_phage_DL64	30.6171	Dinoroseobacter_phage_DFL12phi1
Pseudomonas_phage_DL64	22.5841	Pseudoalteromonas_phage_pYD6-A
Pseudomonas_phage_DL64	21.3946	Vibrio_phage_VBP32
Pseudomonas_phage_DL64	21.3946	Vibrio_phage_VBP47
Pseudomonas_phage_DL64	234.063	Pseudomonas_phage_vB_PaeP_C2-10_Ab09
Pseudomonas_phage_DL64	277.622	Pseudomonas_phage_Pa2
Pseudomonas_phage_DL64	250.46	Pseudomonas_phage_YH6
Pseudomonas_phage_DL64	39.0938	Acinetobacter_phage_Presley
Pseudomonas_phage_DL64	100.056	Pseudomonas_phage_LUZ7
Pseudomonas_phage_DL64	255.708	Pseudomonas_phage_LIT1
Pseudomonas_phage_DL64	103.492	Pseudomonas_phage_KPP21
Pseudomonas_phage_DL64	256.168	Pseudomonas_phage_YH30
Enterobacterial_phage_mEp390	1.98141	Achromobacter_phage_JWF
Cronobacter_phage_ENT39118	50.0141	Enterobacterial_phage_mEp390
Cronobacter_phage_ENT39118	1.25882	Achromobacter_phage_JWF
Salmonella_phage_SSU5	3.15287	Vibrio_phage_vB_VpaS_MAR10
Salmonella_phage_SSU5	5.27628	Enterobacterial_phage_mEp390
Salmonella_phage_SSU5	1.33202	Achromobacter_phage_JWF
Enterobacteria_phage_JenP1	1.66183	Phage_phiJL001
Enterobacteria_phage_JenP1	13.2404	Acinetobacter_phage_IME_AB3
Enterobacteria_phage_JenP1	1.22088	Paracoccus_phage_vB_PmaS_IMEP1
Enterobacteria_phage_JenP1	4.76249	Pseudomonas_phage_vB_Pae-Kakheti25
Enterobacteria_phage_JenP1	4.87407	Pseudomonas_phage_PaMx42
Enterobacteria_phage_JenP1	5.11063	Pseudomonas_phage_73
Enterobacteria_phage_JenP1	4.6026	Rhodobacter_phage_RcTitan
Enterobacteria_phage_JenP1	18.2767	Burkholderia_phage_BcepGomr
Enterobacteria_phage_JenP1	4.76249	Stenotrophomonas_phage_vB_SmaS-DLP_2
Enterobacteria_phage_JenP1	4.93147	Burkholderia_phage_KL1
Enterobacteria_phage_JenP1	5.11063	Pseudomonas_phage_vB_PaeS_SCH_Ab26
Enterobacteria_phage_JenP1	2.56592	Achromobacter_phage_phiAxp-1
Escherichia_phage_slur01	5.00489	Pseudomonas_phage_73
Escherichia_phage_slur01	1.14654	Paracoccus_phage_vB_PmaS_IMEP1
Escherichia_phage_slur01	4.65688	Stenotrophomonas_phage_vB_SmaS-DLP_2
Escherichia_phage_slur01	20.2762	Burkholderia_phage_BcepGomr
Escherichia_phage_slur01	13.0696	Acinetobacter_phage_IME_AB3
Escherichia_phage_slur01	4.65688	Pseudomonas_phage_vB_Pae-Kakheti25
Escherichia_phage_slur01	4.49705	Rhodobacter_phage_RcTitan
Escherichia_phage_slur01	5.00489	Pseudomonas_phage_vB_PaeS_SCH_Ab26
Escherichia_phage_slur01	4.76841	Pseudomonas_phage_PaMx42
Escherichia_phage_slur01	4.82579	Burkholderia_phage_KL1
Escherichia_phage_slur01	2.47623	Achromobacter_phage_phiAxp-1
Escherichia_phage_slur01	89.4384	Enterobacteria_phage_JenP1
Enterobacteria_phage_JenP2	1.66183	Phage_phiJL001
Enterobacteria_phage_JenP2	5.11063	Pseudomonas_phage_73
Enterobacteria_phage_JenP2	13.2404	Acinetobacter_phage_IME_AB3
Enterobacteria_phage_JenP2	4.6026	Rhodobacter_phage_RcTitan
Enterobacteria_phage_JenP2	4.87407	Pseudomonas_phage_PaMx42
Enterobacteria_phage_JenP2	4.76249	Pseudomonas_phage_vB_Pae-Kakheti25
Enterobacteria_phage_JenP2	2.56592	Achromobacter_phage_phiAxp-1
Enterobacteria_phage_JenP2	18.2767	Burkholderia_phage_BcepGomr
Enterobacteria_phage_JenP2	1.22088	Paracoccus_phage_vB_PmaS_IMEP1
Enterobacteria_phage_JenP2	5.11063	Pseudomonas_phage_vB_PaeS_SCH_Ab26
Enterobacteria_phage_JenP2	4.76249	Stenotrophomonas_phage_vB_SmaS-DLP_2
Enterobacteria_phage_JenP2	4.93147	Burkholderia_phage_KL1
Enterobacteria_phage_JenP2	242.249	Enterobacteria_phage_JenP1
Enterobacteria_phage_JenP2	86.4571	Escherichia_phage_slur01
Enterobacteria_phage_JenK1	1.69225	Phage_phiJL001
Enterobacteria_phage_JenK1	4.79854	Stenotrophomonas_phage_vB_SmaS-DLP_2
Enterobacteria_phage_JenK1	4.91014	Pseudomonas_phage_PaMx42
Enterobacteria_phage_JenK1	4.63863	Rhodobacter_phage_RcTitan
Enterobacteria_phage_JenK1	4.96754	Burkholderia_phage_KL1
Enterobacteria_phage_JenK1	1.24626	Paracoccus_phage_vB_PmaS_IMEP1
Enterobacteria_phage_JenK1	18.3525	Burkholderia_phage_BcepGomr
Enterobacteria_phage_JenK1	2.59654	Achromobacter_phage_phiAxp-1
Enterobacteria_phage_JenK1	4.79854	Pseudomonas_phage_vB_Pae-Kakheti25
Enterobacteria_phage_JenK1	13.2988	Acinetobacter_phage_IME_AB3
Enterobacteria_phage_JenK1	5.14673	Pseudomonas_phage_vB_PaeS_SCH_Ab26
Enterobacteria_phage_JenK1	5.14673	Pseudomonas_phage_73
Enterobacteria_phage_JenK1	219.078	Enterobacteria_phage_JenP1
Enterobacteria_phage_JenK1	86.7334	Escherichia_phage_slur01
Enterobacteria_phage_JenK1	223.727	Enterobacteria_phage_JenP2
Enterobacteria_phage_9g	2.19939	Phage_phiJL001
Enterobacteria_phage_9g	5.23907	Rhodobacter_phage_RcTitan
Enterobacteria_phage_9g	5.39931	Stenotrophomonas_phage_vB_SmaS-DLP_2
Enterobacteria_phage_9g	5.51113	Pseudomonas_phage_PaMx42
Enterobacteria_phage_9g	5.39931	Pseudomonas_phage_vB_Pae-Kakheti25
Enterobacteria_phage_9g	5.74817	Pseudomonas_phage_73
Enterobacteria_phage_9g	5.74817	Pseudomonas_phage_vB_PaeS_SCH_Ab26
Enterobacteria_phage_9g	19.6206	Burkholderia_phage_BcepGomr
Enterobacteria_phage_9g	14.2736	Acinetobacter_phage_IME_AB3
Enterobacteria_phage_9g	5.56865	Burkholderia_phage_KL1
Enterobacteria_phage_9g	1.66861	Paracoccus_phage_vB_PmaS_IMEP1
Enterobacteria_phage_9g	3.10649	Achromobacter_phage_phiAxp-1
Enterobacteria_phage_9g	79.191	Escherichia_phage_slur01
Enterobacteria_phage_9g	180.538	Enterobacteria_phage_JenP1
Enterobacteria_phage_9g	190.103	Enterobacteria_phage_JenK1
Enterobacteria_phage_9g	189.464	Enterobacteria_phage_JenP2
Enterobacteria_phage_CAjan	4.79139	Burkholderia_phage_KL1
Enterobacteria_phage_CAjan	4.62249	Stenotrophomonas_phage_vB_SmaS-DLP_2
Enterobacteria_phage_CAjan	4.97046	Pseudomonas_phage_73
Enterobacteria_phage_CAjan	2.44703	Achromobacter_phage_phiAxp-1
Enterobacteria_phage_CAjan	4.97046	Pseudomonas_phage_vB_PaeS_SCH_Ab26
Enterobacteria_phage_CAjan	4.62249	Pseudomonas_phage_vB_Pae-Kakheti25
Enterobacteria_phage_CAjan	13.014	Acinetobacter_phage_IME_AB3
Enterobacteria_phage_CAjan	4.73401	Pseudomonas_phage_PaMx42
Enterobacteria_phage_CAjan	1.12232	Paracoccus_phage_vB_PmaS_IMEP1
Enterobacteria_phage_CAjan	4.46269	Rhodobacter_phage_RcTitan
Enterobacteria_phage_CAjan	22.4547	Burkholderia_phage_BcepGomr
Enterobacteria_phage_CAjan	229.93	Escherichia_phage_slur01
Enterobacteria_phage_CAjan	86.1974	Enterobacteria_phage_JenP1
Enterobacteria_phage_CAjan	83.2533	Enterobacteria_phage_JenP2
Enterobacteria_phage_CAjan	83.5203	Enterobacteria_phage_JenK1
Enterobacteria_phage_CAjan	75.9698	Enterobacteria_phage_9g
Salmonella_phage_Chi	37.3933	Achromobacter_phage_phiAxp-2
Salmonella_phage_Chi	2.57233	Pseudomonas_phage_PaMx28
Loktanella_phage_pCB2051-A	33.6322	Salmonella_phage_Chi
Loktanella_phage_pCB2051-A	25.099	Achromobacter_phage_phiAxp-2
Loktanella_phage_pCB2051-A	2.43147	Pseudomonas_phage_MP1412
Loktanella_phage_pCB2051-A	2.078	Pseudomonas_phage_PAE1
Loktanella_phage_pCB2051-A	2.1696	Pseudomonas_phage_M6
Loktanella_phage_pCB2051-A	8.37982	Pseudomonas_phage_PaMx28
Loktanella_phage_pCB2051-A	6.31768	Pseudomonas_phage_PaMx74
Loktanella_phage_pCB2051-A	2.43147	Pseudomonas_phage_YuA
Loktanella_phage_pCB2051-A	3.0538	Rhodobacter_phage_RcTitan
Salmonella_phage_FSLSP030	34.1823	Loktanella_phage_pCB2051-A
Salmonella_phage_FSLSP030	38.0094	Achromobacter_phage_phiAxp-2
Salmonella_phage_FSLSP030	198.612	Salmonella_phage_Chi
Salmonella_phage_FSLSP030	2.71834	Pseudomonas_phage_PaMx28
Salmonella_phage_37	30.3525	Loktanella_phage_pCB2051-A
Salmonella_phage_37	164.058	Salmonella_phage_Chi
Salmonella_phage_37	167.623	Salmonella_phage_FSLSP030
Salmonella_phage_37	33.7346	Achromobacter_phage_phiAxp-2
Salmonella_phage_37	1.68439	Pseudomonas_phage_PaMx28
Salmonella_phage_37	1.6489	Pseudomonas_phage_PaMx74
Proteus_phage_pPM_01	96.3614	Salmonella_phage_Chi
Proteus_phage_pPM_01	94.4233	Salmonella_phage_FSLSP030
Proteus_phage_pPM_01	43.3752	Achromobacter_phage_phiAxp-2
Proteus_phage_pPM_01	82.3265	Salmonella_phage_37
Proteus_phage_pPM_01	29.2663	Loktanella_phage_pCB2051-A
Proteus_phage_pPM_01	2.75619	Pseudomonas_phage_PaMx28
Enterobacter_phage_Enc34	159.444	Salmonella_phage_FSLSP030
Enterobacter_phage_Enc34	98.0229	Proteus_phage_pPM_01
Enterobacter_phage_Enc34	32.9908	Loktanella_phage_pCB2051-A
Enterobacter_phage_Enc34	135.507	Salmonella_phage_37
Enterobacter_phage_Enc34	39.1791	Achromobacter_phage_phiAxp-2
Enterobacter_phage_Enc34	168.682	Salmonella_phage_Chi
Enterobacter_phage_Enc34	2.40092	Pseudomonas_phage_PaMx28
Salmonella_phage_FSLSP088	34.3255	Loktanella_phage_pCB2051-A
Salmonella_phage_FSLSP088	194.88	Salmonella_phage_Chi
Salmonella_phage_FSLSP088	156.156	Enterobacter_phage_Enc34
Salmonella_phage_FSLSP088	38.1699	Achromobacter_phage_phiAxp-2
Salmonella_phage_FSLSP088	184.14	Salmonella_phage_FSLSP030
Salmonella_phage_FSLSP088	94.7829	Proteus_phage_pPM_01
Salmonella_phage_FSLSP088	168.629	Salmonella_phage_37
Salmonella_phage_FSLSP088	2.72044	Pseudomonas_phage_PaMx74
Salmonella_phage_FSLSP088	2.75619	Pseudomonas_phage_PaMx28
Salmonella_phage_FSLSP088	1.34445	Rhodobacter_phage_RcTitan
Burkholderia_phage_BcepNazgul	55.5782	Salmonella_phage_Chi
Burkholderia_phage_BcepNazgul	31.3789	Loktanella_phage_pCB2051-A
Burkholderia_phage_BcepNazgul	56.6275	Salmonella_phage_FSLSP088
Burkholderia_phage_BcepNazgul	57.4182	Enterobacter_phage_Enc34
Burkholderia_phage_BcepNazgul	53.7654	Proteus_phage_pPM_01
Burkholderia_phage_BcepNazgul	56.4101	Salmonella_phage_FSLSP030
Burkholderia_phage_BcepNazgul	50.699	Salmonella_phage_37
Burkholderia_phage_BcepNazgul	45.4747	Achromobacter_phage_phiAxp-2
Burkholderia_phage_BcepNazgul	2.60856	Pseudomonas_phage_PaMx74
Burkholderia_phage_BcepNazgul	4.54258	Pseudomonas_phage_PaMx28
Burkholderia_phage_AH2	49.8329	Salmonella_phage_FSLSP030
Burkholderia_phage_AH2	44.5679	Proteus_phage_pPM_01
Burkholderia_phage_AH2	78.4915	Burkholderia_phage_BcepNazgul
Burkholderia_phage_AH2	49.0759	Salmonella_phage_Chi
Burkholderia_phage_AH2	47.2269	Achromobacter_phage_phiAxp-2
Burkholderia_phage_AH2	44.6167	Salmonella_phage_37
Burkholderia_phage_AH2	50.0305	Salmonella_phage_FSLSP088
Burkholderia_phage_AH2	33.2416	Loktanella_phage_pCB2051-A
Burkholderia_phage_AH2	48.1971	Enterobacter_phage_Enc34
Burkholderia_phage_AH2	2.4324	Pseudomonas_phage_PaMx74
Burkholderia_phage_AH2	2.10075	Pseudomonas_phage_M6
Burkholderia_phage_AH2	2.00919	Pseudomonas_phage_PAE1
Burkholderia_phage_AH2	2.4681	Pseudomonas_phage_PaMx28
Burkholderia_phage_AH2	2.3625	Pseudomonas_phage_YuA
Burkholderia_phage_AH2	2.3625	Pseudomonas_phage_MP1412
Burkholderia_phage_AH2	1.496	Vibrio_phage_vB_VpaS_MAR10
Burkholderia_phage_AH2	1.21783	Pseudomonas_phage_vB_Pae-Kakheti25
Burkholderia_phage_AH2	1.29582	Pseudomonas_phage_PaMx42
Burkholderia_phage_AH2	5.27303	Burkholderia_phage_KL1
Burkholderia_phage_AH2	1.46102	Pseudomonas_phage_vB_PaeS_SCH_Ab26
Burkholderia_phage_AH2	1.21783	Stenotrophomonas_phage_vB_SmaS-DLP_2
Burkholderia_phage_AH2	2.9846	Rhodobacter_phage_RcTitan
Salmonella_phage_SPN19	178.629	Salmonella_phage_FSLSP088
Salmonella_phage_SPN19	49.6387	Burkholderia_phage_AH2
Salmonella_phage_SPN19	158.852	Salmonella_phage_37
Salmonella_phage_SPN19	97.4132	Proteus_phage_pPM_01
Salmonella_phage_SPN19	177.732	Salmonella_phage_FSLSP030
Salmonella_phage_SPN19	166.871	Enterobacter_phage_Enc34
Salmonella_phage_SPN19	37.8515	Achromobacter_phage_phiAxp-2
Salmonella_phage_SPN19	192.649	Salmonella_phage_Chi
Salmonella_phage_SPN19	34.0414	Loktanella_phage_pCB2051-A
Salmonella_phage_SPN19	56.1966	Burkholderia_phage_BcepNazgul
Salmonella_phage_SPN19	2.68104	Pseudomonas_phage_PaMx28
Ruegeria_phage_DSS3-P1	30.9324	Salmonella_phage_FSLSP030
Ruegeria_phage_DSS3-P1	40.3299	Loktanella_phage_pCB2051-A
Ruegeria_phage_DSS3-P1	28.5994	Proteus_phage_pPM_01
Ruegeria_phage_DSS3-P1	29.8107	Enterobacter_phage_Enc34
Ruegeria_phage_DSS3-P1	26.7895	Achromobacter_phage_phiAxp-2
Ruegeria_phage_DSS3-P1	28.3485	Salmonella_phage_SPN19
Ruegeria_phage_DSS3-P1	31.0671	Salmonella_phage_FSLSP088
Ruegeria_phage_DSS3-P1	32.4889	Burkholderia_phage_AH2
Ruegeria_phage_DSS3-P1	30.4147	Salmonella_phage_Chi
Ruegeria_phage_DSS3-P1	28.2261	Burkholderia_phage_BcepNazgul
Ruegeria_phage_DSS3-P1	27.3229	Salmonella_phage_37
Ruegeria_phage_DSS3-P1	4.17906	Pseudomonas_phage_PaMx28
Ruegeria_phage_DSS3-P1	4.13706	Pseudomonas_phage_PaMx74
Salmonella_phage_iEPS5	166.087	Enterobacter_phage_Enc34
Salmonella_phage_iEPS5	177.807	Salmonella_phage_FSLSP088
Salmonella_phage_iEPS5	186.04	Salmonella_phage_FSLSP030
Salmonella_phage_iEPS5	201.232	Salmonella_phage_Chi
Salmonella_phage_iEPS5	209.766	Salmonella_phage_SPN19
Salmonella_phage_iEPS5	158.031	Salmonella_phage_37
Salmonella_phage_iEPS5	37.6963	Achromobacter_phage_phiAxp-2
Salmonella_phage_iEPS5	97.0552	Proteus_phage_pPM_01
Salmonella_phage_iEPS5	33.9028	Loktanella_phage_pCB2051-A
Salmonella_phage_iEPS5	49.4479	Burkholderia_phage_AH2
Salmonella_phage_iEPS5	28.2261	Ruegeria_phage_DSS3-P1
Salmonella_phage_iEPS5	55.9869	Burkholderia_phage_BcepNazgul
Salmonella_phage_iEPS5	2.64429	Pseudomonas_phage_PaMx28
Providencia_phage_Redjac	87.4843	Salmonella_phage_SPN19
Providencia_phage_Redjac	30.4814	Achromobacter_phage_phiAxp-2
Providencia_phage_Redjac	87.7618	Salmonella_phage_FSLSP030
Providencia_phage_Redjac	93.0231	Enterobacter_phage_Enc34
Providencia_phage_Redjac	20.7415	Loktanella_phage_pCB2051-A
Providencia_phage_Redjac	20.2773	Ruegeria_phage_DSS3-P1
Providencia_phage_Redjac	90.4804	Salmonella_phage_Chi
Providencia_phage_Redjac	88.0448	Salmonella_phage_FSLSP088
Providencia_phage_Redjac	36.9337	Burkholderia_phage_AH2
Providencia_phage_Redjac	66.459	Proteus_phage_pPM_01
Providencia_phage_Redjac	87.2121	Salmonella_phage_iEPS5
Providencia_phage_Redjac	37.5578	Burkholderia_phage_BcepNazgul
Providencia_phage_Redjac	80.4504	Salmonella_phage_37
Staphylococcus_phage_SA1	14.4942	Burkholderia_phage_AH2
Staphylococcus_phage_SA1	16.9947	Burkholderia_phage_BcepNazgul
Staphylococcus_phage_SA1	10.634	Loktanella_phage_pCB2051-A
Staphylococcus_phage_SA1	28.5721	Providencia_phage_Redjac
Staphylococcus_phage_SA1	25.783	Salmonella_phage_iEPS5
Staphylococcus_phage_SA1	12.198	Ruegeria_phage_DSS3-P1
Staphylococcus_phage_SA1	28.4704	Salmonella_phage_FSLSP088
Staphylococcus_phage_SA1	24.7337	Salmonella_phage_37
Staphylococcus_phage_SA1	21.637	Proteus_phage_pPM_01
Staphylococcus_phage_SA1	28.3359	Salmonella_phage_FSLSP030
Staphylococcus_phage_SA1	25.9053	Salmonella_phage_SPN19
Staphylococcus_phage_SA1	11.9349	Achromobacter_phage_phiAxp-2
Staphylococcus_phage_SA1	24.9779	Enterobacter_phage_Enc34
Staphylococcus_phage_SA1	27.819	Salmonella_phage_Chi
Staphylococcus_phage_SA1	1.58658	Pseudomonas_phage_PaMx28
Staphylococcus_phage_SA1	1.55111	Pseudomonas_phage_PaMx74
Acidianus_bottle-shaped_virus_2	136.86	Acidianus_bottle-shaped_virus
Acidianus_bottle-shaped_virus_3	82.085	Acidianus_bottle-shaped_virus_2
Acidianus_bottle-shaped_virus_3	80.8677	Acidianus_bottle-shaped_virus
Sulfolobales_Mexican_rudivirus_1	1.39037	Acidianus_filamentous_virus_1
Sulfolobus_islandicus_rod-shaped_virus_2	38.4772	Sulfolobales_Mexican_rudivirus_1
Sulfolobus_islandicus_rod-shaped_virus_2	2.87001	Acidianus_filamentous_virus_1
Sulfolobus_islandicus_rod-shaped_virus_1	40.2278	Sulfolobales_Mexican_rudivirus_1
Sulfolobus_islandicus_rod-shaped_virus_1	3.28084	Acidianus_filamentous_virus_1
Sulfolobus_islandicus_rod-shaped_virus_1	120.143	Sulfolobus_islandicus_rod-shaped_virus_2
Acidianus_rod-shaped_virus_2	45.0707	Sulfolobus_islandicus_rod-shaped_virus_1
Acidianus_rod-shaped_virus_2	40.6779	Sulfolobales_Mexican_rudivirus_1
Acidianus_rod-shaped_virus_2	43.0664	Sulfolobus_islandicus_rod-shaped_virus_2
Acidianus_rod-shaped_virus_2	2.79053	Acidianus_filamentous_virus_2
Sulfolobus_islandicus_filamentous_virus	3.49029	Sulfolobus_islandicus_rod-shaped_virus_2
Sulfolobus_islandicus_filamentous_virus	1.93167	Sulfolobus_islandicus_rod-shaped_virus_1
Sulfolobus_islandicus_filamentous_virus	16.9993	Acidianus_filamentous_virus_2
Acidianus_filamentous_virus_3	81.4205	Sulfolobus_islandicus_filamentous_virus
Acidianus_filamentous_virus_3	10.3048	Acidianus_filamentous_virus_2
Acidianus_filamentous_virus_6	78.8855	Sulfolobus_islandicus_filamentous_virus
Acidianus_filamentous_virus_6	10.4284	Acidianus_filamentous_virus_2
Acidianus_filamentous_virus_6	191.567	Acidianus_filamentous_virus_3
Acidianus_filamentous_virus_7	88.8812	Sulfolobus_islandicus_filamentous_virus
Acidianus_filamentous_virus_7	109.313	Acidianus_filamentous_virus_6
Acidianus_filamentous_virus_7	37.4618	Acidianus_filamentous_virus_2
Acidianus_filamentous_virus_7	112.222	Acidianus_filamentous_virus_3
Acidianus_filamentous_virus_8	77.372	Sulfolobus_islandicus_filamentous_virus
Acidianus_filamentous_virus_8	10.7561	Acidianus_filamentous_virus_2
Acidianus_filamentous_virus_8	174.298	Acidianus_filamentous_virus_6
Acidianus_filamentous_virus_8	115.525	Acidianus_filamentous_virus_7
Acidianus_filamentous_virus_8	177.599	Acidianus_filamentous_virus_3
Acidianus_filamentous_virus_9	134.977	Acidianus_filamentous_virus_6
Acidianus_filamentous_virus_9	126.593	Acidianus_filamentous_virus_8
Acidianus_filamentous_virus_9	82.1466	Acidianus_filamentous_virus_7
Acidianus_filamentous_virus_9	7.80256	Acidianus_filamentous_virus_2
Acidianus_filamentous_virus_9	92.6707	Sulfolobus_islandicus_filamentous_virus
Acidianus_filamentous_virus_9	133.753	Acidianus_filamentous_virus_3
Acidianus_rod-shaped_virus_1	39.1704	Sulfolobus_islandicus_rod-shaped_virus_1
Acidianus_rod-shaped_virus_1	52.9016	Acidianus_rod-shaped_virus_2
Acidianus_rod-shaped_virus_1	37.4201	Sulfolobus_islandicus_rod-shaped_virus_2
Acidianus_rod-shaped_virus_1	37.8704	Sulfolobales_Mexican_rudivirus_1
Stygiolobus_rod-shaped_virus	50.8104	Acidianus_rod-shaped_virus_2
Stygiolobus_rod-shaped_virus	47.921	Acidianus_rod-shaped_virus_1
Stygiolobus_rod-shaped_virus	68.2844	Sulfolobus_islandicus_rod-shaped_virus_1
Stygiolobus_rod-shaped_virus	42.2138	Sulfolobales_Mexican_rudivirus_1
Stygiolobus_rod-shaped_virus	65.3988	Sulfolobus_islandicus_rod-shaped_virus_2
Acidianus_two-tailed_virus	4.14894	Acidianus_rod-shaped_virus_2
Sulfolobales_virus_YNP1	2.37627	Acidianus_spindle-shaped_virus_1
Sulfolobus_spindle-shaped_virus_1	30.068	Acidianus_spindle-shaped_virus_1
Sulfolobus_virus_Ragged_Hills	32.1024	Acidianus_spindle-shaped_virus_1
Sulfolobus_virus_Ragged_Hills	40.297	Sulfolobus_spindle-shaped_virus_1
Sulfolobus_spindle-shaped_virus_2	61.4181	Sulfolobus_virus_Ragged_Hills
Sulfolobus_spindle-shaped_virus_2	29.5982	Acidianus_spindle-shaped_virus_1
Sulfolobus_spindle-shaped_virus_2	44.6907	Sulfolobus_spindle-shaped_virus_1
Sulfolobus_spindle-shaped_virus_4	66.7563	Sulfolobus_spindle-shaped_virus_2
Sulfolobus_spindle-shaped_virus_4	65.3225	Sulfolobus_virus_Ragged_Hills
Sulfolobus_spindle-shaped_virus_4	29.5982	Acidianus_spindle-shaped_virus_1
Sulfolobus_spindle-shaped_virus_4	44.6907	Sulfolobus_spindle-shaped_virus_1
Sulfolobus_spindle-shaped_virus_5	66.7563	Sulfolobus_spindle-shaped_virus_2
Sulfolobus_spindle-shaped_virus_5	103.561	Sulfolobus_spindle-shaped_virus_4
Sulfolobus_spindle-shaped_virus_5	65.3225	Sulfolobus_virus_Ragged_Hills
Sulfolobus_spindle-shaped_virus_5	29.5982	Acidianus_spindle-shaped_virus_1
Sulfolobus_spindle-shaped_virus_5	44.6907	Sulfolobus_spindle-shaped_virus_1
Sulfolobus_virus_Kamchatka_1	60.2663	Sulfolobus_spindle-shaped_virus_5
Sulfolobus_virus_Kamchatka_1	48.722	Sulfolobus_spindle-shaped_virus_2
Sulfolobus_virus_Kamchatka_1	44.1458	Sulfolobus_virus_Ragged_Hills
Sulfolobus_virus_Kamchatka_1	43.8671	Acidianus_spindle-shaped_virus_1
Sulfolobus_virus_Kamchatka_1	60.2663	Sulfolobus_spindle-shaped_virus_4
Sulfolobus_virus_Kamchatka_1	42.0743	Sulfolobus_spindle-shaped_virus_1
Sulfolobus_spindle-shaped_virus_6	55.4231	Sulfolobus_spindle-shaped_virus_4
Sulfolobus_spindle-shaped_virus_6	43.166	Acidianus_spindle-shaped_virus_1
Sulfolobus_spindle-shaped_virus_6	55.4231	Sulfolobus_spindle-shaped_virus_5
Sulfolobus_spindle-shaped_virus_6	43.4447	Sulfolobus_virus_Ragged_Hills
Sulfolobus_spindle-shaped_virus_6	51.6492	Sulfolobus_spindle-shaped_virus_2
Sulfolobus_spindle-shaped_virus_6	34.7679	Sulfolobus_virus_Kamchatka_1
Sulfolobus_spindle-shaped_virus_6	37.9235	Sulfolobus_spindle-shaped_virus_1
Sulfolobus_spindle-shaped_virus_7	2.69924	Sulfolobales_virus_YNP1
Sulfolobus_spindle-shaped_virus_7	51.6492	Sulfolobus_spindle-shaped_virus_5
Sulfolobus_spindle-shaped_virus_7	47.9587	Sulfolobus_spindle-shaped_virus_2
Sulfolobus_spindle-shaped_virus_7	50.5916	Sulfolobus_virus_Ragged_Hills
Sulfolobus_spindle-shaped_virus_7	55.4231	Sulfolobus_spindle-shaped_virus_4
Sulfolobus_spindle-shaped_virus_7	34.4934	Sulfolobus_spindle-shaped_virus_1
Sulfolobus_spindle-shaped_virus_7	50.2672	Acidianus_spindle-shaped_virus_1
Sulfolobus_spindle-shaped_virus_7	34.2303	Sulfolobus_spindle-shaped_virus_6
Sulfolobus_spindle-shaped_virus_7	56.7435	Sulfolobus_virus_Kamchatka_1
Sulfolobales_Mexican_fusellovirus_1	19.9995	Sulfolobus_spindle-shaped_virus_6
Sulfolobales_Mexican_fusellovirus_1	19.2918	Acidianus_spindle-shaped_virus_1
Sulfolobales_Mexican_fusellovirus_1	23.0752	Sulfolobus_spindle-shaped_virus_5
Sulfolobales_Mexican_fusellovirus_1	23.6036	Sulfolobus_virus_Kamchatka_1
Sulfolobales_Mexican_fusellovirus_1	23.0752	Sulfolobus_spindle-shaped_virus_4
Sulfolobales_Mexican_fusellovirus_1	20.1562	Sulfolobus_spindle-shaped_virus_1
Sulfolobales_Mexican_fusellovirus_1	22.6	Sulfolobus_virus_Ragged_Hills
Sulfolobales_Mexican_fusellovirus_1	23.0752	Sulfolobus_spindle-shaped_virus_2
Sulfolobales_Mexican_fusellovirus_1	23.2448	Sulfolobus_spindle-shaped_virus_7
Acidianus_tailed_spindle_virus	7.58504	Acidianus_two-tailed_virus
Sulfolobus_monocaudavirus_SMV4	30.0047	Acidianus_two-tailed_virus
Sulfolobus_monocaudavirus_SMV4	22.8909	Acidianus_tailed_spindle_virus
Sulfolobus_monocaudavirus_SMV4	4.89561	Sulfolobales_virus_YNP1
Sulfolobus_monocaudavirus_SMV2	20.4861	Acidianus_two-tailed_virus
Sulfolobus_monocaudavirus_SMV2	94.0187	Sulfolobus_monocaudavirus_SMV4
Sulfolobus_monocaudavirus_SMV2	14.251	Acidianus_tailed_spindle_virus
Sulfolobus_monocaudavirus_SMV2	3.0649	Sulfolobales_virus_YNP1
Sulfolobus_monocaudavirus_SMV1	94.4975	Sulfolobus_monocaudavirus_SMV2
Sulfolobus_monocaudavirus_SMV1	24.7092	Acidianus_two-tailed_virus
Sulfolobus_monocaudavirus_SMV1	97.1043	Sulfolobus_monocaudavirus_SMV4
Sulfolobus_monocaudavirus_SMV1	11.1717	Acidianus_tailed_spindle_virus
Sulfolobus_monocaudavirus_SMV1	1.71205	Sulfolobales_virus_YNP1
Sulfolobus_monocaudavirus_SMV3	95.0357	Sulfolobus_monocaudavirus_SMV1
Sulfolobus_monocaudavirus_SMV3	98.0033	Sulfolobus_monocaudavirus_SMV2
Sulfolobus_monocaudavirus_SMV3	124.006	Sulfolobus_monocaudavirus_SMV4
Sulfolobus_monocaudavirus_SMV3	32.7077	Acidianus_two-tailed_virus
Sulfolobus_monocaudavirus_SMV3	32.313	Acidianus_tailed_spindle_virus
Sulfolobus_monocaudavirus_SMV3	7.9986	Sulfolobales_virus_YNP1
Sulfolobus_virus_STSV1	24.5145	Acidianus_tailed_spindle_virus
Sulfolobus_virus_STSV2	156.315	Sulfolobus_virus_STSV1
Sulfolobus_virus_STSV2	26.7142	Acidianus_tailed_spindle_virus
Sulfolobales_Virus_YNP2	16.8283	Sulfolobus_monocaudavirus_SMV2
Sulfolobales_Virus_YNP2	3.2426	Acidianus_two-tailed_virus
Sulfolobales_Virus_YNP2	7.53274	Sulfolobus_monocaudavirus_SMV4
Sulfolobales_Virus_YNP2	4.1727	Sulfolobus_monocaudavirus_SMV1
Sulfolobales_Virus_YNP2	10.806	Sulfolobus_monocaudavirus_SMV3
Sulfolobales_Virus_YNP2	98.5414	Sulfolobales_virus_YNP1
Acinetobacter_phage_YMC11/12/R2315	142.647	Acinetobacter_bacteriophage_AP22
Acinetobacter_phage_YMC-13-01-C62	254.7	Acinetobacter_phage_YMC11/12/R2315
Acinetobacter_phage_YMC-13-01-C62	136.105	Acinetobacter_bacteriophage_AP22
Acinetobacter_phage_phiAC-1	62.9078	Acinetobacter_phage_YMC11/12/R2315
Acinetobacter_phage_phiAC-1	73.3935	Acinetobacter_bacteriophage_AP22
Acinetobacter_phage_phiAC-1	60.3282	Acinetobacter_phage_YMC-13-01-C62
Burkholderia_phage_BcepB1A	2.15505	Acinetobacter_bacteriophage_AP22
Burkholderia_phage_BcepB1A	2.27654	Acinetobacter_phage_YMC11/12/R2315
Burkholderia_phage_BcepB1A	2.30785	Acinetobacter_phage_YMC-13-01-C62
Burkholderia_phage_BcepB1A	2.37165	Acinetobacter_phage_phiAC-1
Xanthomonas_phage_OP2	2.7126	Acinetobacter_phage_YMC11/12/R2315
Xanthomonas_phage_OP2	6.44089	Acinetobacter_bacteriophage_AP22
Xanthomonas_phage_OP2	4.73581	Acinetobacter_phage_phiAC-1
Aeromonas_phage_vB_AsaM-56	15.3279	Acinetobacter_bacteriophage_AP22
Aeromonas_phage_vB_AsaM-56	15.6051	Acinetobacter_phage_YMC11/12/R2315
Aeromonas_phage_vB_AsaM-56	17.9959	Acinetobacter_phage_phiAC-1
Aeromonas_phage_vB_AsaM-56	13.5601	Acinetobacter_phage_YMC-13-01-C62
Aeromonas_phage_vB_AsaM-56	17.5415	Xanthomonas_phage_OP2
Burkholderia_phage_BcepNY3	2.38821	Acinetobacter_phage_YMC11/12/R2315
Burkholderia_phage_BcepNY3	5.99982	Acinetobacter_bacteriophage_AP22
Burkholderia_phage_BcepNY3	4.35328	Acinetobacter_phage_phiAC-1
Burkholderia_phage_BcepNY3	16.789	Aeromonas_phage_vB_AsaM-56
Burkholderia_phage_BcepNY3	74.6471	Xanthomonas_phage_OP2
Edwardsiella_phage_GF-2	22.287	Acinetobacter_phage_YMC11/12/R2315
Edwardsiella_phage_GF-2	20.1268	Acinetobacter_phage_YMC-13-01-C62
Edwardsiella_phage_GF-2	22.5608	Acinetobacter_phage_phiAC-1
Edwardsiella_phage_GF-2	21.9382	Acinetobacter_bacteriophage_AP22
Edwardsiella_phage_GF-2	17.6151	Xanthomonas_phage_OP2
Edwardsiella_phage_GF-2	16.8626	Burkholderia_phage_BcepNY3
Edwardsiella_phage_GF-2	31.8753	Aeromonas_phage_vB_AsaM-56
Burkholderia_phage_Bcep781	2.54521	Acinetobacter_phage_YMC11/12/R2315
Burkholderia_phage_Bcep781	4.53838	Acinetobacter_phage_phiAC-1
Burkholderia_phage_Bcep781	6.2132	Acinetobacter_bacteriophage_AP22
Burkholderia_phage_Bcep781	17.2261	Edwardsiella_phage_GF-2
Burkholderia_phage_Bcep781	17.1526	Aeromonas_phage_vB_AsaM-56
Burkholderia_phage_Bcep781	75.7886	Xanthomonas_phage_OP2
Burkholderia_phage_Bcep781	165.828	Burkholderia_phage_BcepNY3
Burkholderia_phage_Bcep1	5.94851	Acinetobacter_bacteriophage_AP22
Burkholderia_phage_Bcep1	4.30876	Acinetobacter_phage_phiAC-1
Burkholderia_phage_Bcep1	2.35043	Acinetobacter_phage_YMC11/12/R2315
Burkholderia_phage_Bcep1	16.7018	Aeromonas_phage_vB_AsaM-56
Burkholderia_phage_Bcep1	16.7753	Edwardsiella_phage_GF-2
Burkholderia_phage_Bcep1	198.865	Burkholderia_phage_BcepNY3
Burkholderia_phage_Bcep1	74.3758	Xanthomonas_phage_OP2
Burkholderia_phage_Bcep1	165.091	Burkholderia_phage_Bcep781
Burkholderia_phage_Bcep43	6.2687	Acinetobacter_bacteriophage_AP22
Burkholderia_phage_Bcep43	4.58652	Acinetobacter_phage_phiAC-1
Burkholderia_phage_Bcep43	2.58604	Acinetobacter_phage_YMC11/12/R2315
Burkholderia_phage_Bcep43	162.286	Burkholderia_phage_BcepNY3
Burkholderia_phage_Bcep43	166.007	Burkholderia_phage_Bcep1
Burkholderia_phage_Bcep43	17.3208	Edwardsiella_phage_GF-2
Burkholderia_phage_Bcep43	76.0894	Xanthomonas_phage_OP2
Burkholderia_phage_Bcep43	17.2473	Aeromonas_phage_vB_AsaM-56
Burkholderia_phage_Bcep43	195.267	Burkholderia_phage_Bcep781
Enterobacteria_phage_CC31	176.785	Acinetobacter_phage_133
Enterobacteria_phage_RB32	292.565	Enterobacteria_phage_CC31
Enterobacteria_phage_RB32	178.748	Acinetobacter_phage_133
Escherichia_phage_slur07	294.072	Enterobacteria_phage_CC31
Escherichia_phage_slur07	177.273	Acinetobacter_phage_133
Escherichia_phage_slur07	300	Enterobacteria_phage_RB32
Shigella_phage_pSs-1	300	Escherichia_phage_slur07
Shigella_phage_pSs-1	300	Enterobacteria_phage_RB32
Shigella_phage_pSs-1	296.846	Enterobacteria_phage_CC31
Shigella_phage_pSs-1	177.273	Acinetobacter_phage_133
Cronobacter_phage_vB_CsaM_GAP161	160.915	Enterobacteria_phage_RB32
Cronobacter_phage_vB_CsaM_GAP161	154.632	Enterobacteria_phage_CC31
Cronobacter_phage_vB_CsaM_GAP161	157.222	Shigella_phage_pSs-1
Cronobacter_phage_vB_CsaM_GAP161	130.302	Acinetobacter_phage_133
Cronobacter_phage_vB_CsaM_GAP161	159.481	Escherichia_phage_slur07
Cronobacter_phage_vB_CsaM_GAP161	4.39933	Staphylococcus_phage_SA1
Klebsiella_phage_KP15	162.669	Enterobacteria_phage_CC31
Klebsiella_phage_KP15	300	Cronobacter_phage_vB_CsaM_GAP161
Klebsiella_phage_KP15	160.71	Escherichia_phage_slur07
Klebsiella_phage_KP15	135.431	Acinetobacter_phage_133
Klebsiella_phage_KP15	160.71	Shigella_phage_pSs-1
Klebsiella_phage_KP15	162.188	Enterobacteria_phage_RB32
Klebsiella_phage_KP15	4.69715	Staphylococcus_phage_SA1
Enterobacteria_phage_AR1	159.998	Klebsiella_phage_KP15
Enterobacteria_phage_AR1	156.469	Cronobacter_phage_vB_CsaM_GAP161
Enterobacteria_phage_AR1	300	Enterobacteria_phage_RB32
Enterobacteria_phage_AR1	300	Escherichia_phage_slur07
Enterobacteria_phage_AR1	291.314	Enterobacteria_phage_CC31
Enterobacteria_phage_AR1	300	Shigella_phage_pSs-1
Enterobacteria_phage_AR1	174.026	Acinetobacter_phage_133
Stenotrophomonas_phage_IME13	174.926	Enterobacteria_phage_CC31
Stenotrophomonas_phage_IME13	172.321	Shigella_phage_pSs-1
Stenotrophomonas_phage_IME13	177.461	Escherichia_phage_slur07
Stenotrophomonas_phage_IME13	143.861	Klebsiella_phage_KP15
Stenotrophomonas_phage_IME13	143.439	Cronobacter_phage_vB_CsaM_GAP161
Stenotrophomonas_phage_IME13	169.483	Enterobacteria_phage_AR1
Stenotrophomonas_phage_IME13	174.098	Enterobacteria_phage_RB32
Stenotrophomonas_phage_IME13	153.866	Acinetobacter_phage_133
Escherichia_phage_wV7	155.808	Cronobacter_phage_vB_CsaM_GAP161
Escherichia_phage_wV7	300	Shigella_phage_pSs-1
Escherichia_phage_wV7	300	Enterobacteria_phage_CC31
Escherichia_phage_wV7	173.383	Acinetobacter_phage_133
Escherichia_phage_wV7	300	Escherichia_phage_slur07
Escherichia_phage_wV7	170.972	Stenotrophomonas_phage_IME13
Escherichia_phage_wV7	159.294	Klebsiella_phage_KP15
Escherichia_phage_wV7	300	Enterobacteria_phage_RB32
Escherichia_phage_wV7	300	Enterobacteria_phage_AR1
Sphingomonas_phage_PAU	9.57697	Escherichia_phage_slur07
Sphingomonas_phage_PAU	9.57697	Shigella_phage_pSs-1
Sphingomonas_phage_PAU	9.11634	Enterobacteria_phage_AR1
Sphingomonas_phage_PAU	9.35851	Escherichia_phage_wV7
Sphingomonas_phage_PAU	13.0346	Stenotrophomonas_phage_IME13
Sphingomonas_phage_PAU	10.3548	Enterobacteria_phage_CC31
Sphingomonas_phage_PAU	9.45137	Enterobacteria_phage_RB32
Sphingomonas_phage_PAU	12.9227	Cronobacter_phage_vB_CsaM_GAP161
Sphingomonas_phage_PAU	13.5504	Klebsiella_phage_KP15
Sphingomonas_phage_PAU	11.0847	Acinetobacter_phage_133
Rhizobium_phage_vB_RleM_P10VF	22.923	Shigella_phage_pSs-1
Rhizobium_phage_vB_RleM_P10VF	29.2932	Klebsiella_phage_KP15
Rhizobium_phage_vB_RleM_P10VF	20.9016	Enterobacteria_phage_CC31
Rhizobium_phage_vB_RleM_P10VF	22.7319	Enterobacteria_phage_RB32
Rhizobium_phage_vB_RleM_P10VF	24.8346	Acinetobacter_phage_133
Rhizobium_phage_vB_RleM_P10VF	22.222	Enterobacteria_phage_AR1
Rhizobium_phage_vB_RleM_P10VF	22.5906	Escherichia_phage_wV7
Rhizobium_phage_vB_RleM_P10VF	24.376	Escherichia_phage_slur07
Rhizobium_phage_vB_RleM_P10VF	28.3501	Cronobacter_phage_vB_CsaM_GAP161
Rhizobium_phage_vB_RleM_P10VF	13.5888	Sphingomonas_phage_PAU
Rhizobium_phage_vB_RleM_P10VF	29.8334	Stenotrophomonas_phage_IME13
Enterobacteria_phage_JSE	22.4049	Rhizobium_phage_vB_RleM_P10VF
Enterobacteria_phage_JSE	158.506	Klebsiella_phage_KP15
Enterobacteria_phage_JSE	167.704	Enterobacteria_phage_CC31
Enterobacteria_phage_JSE	159.492	Cronobacter_phage_vB_CsaM_GAP161
Enterobacteria_phage_JSE	176.427	Enterobacteria_phage_AR1
Enterobacteria_phage_JSE	181.206	Enterobacteria_phage_RB32
Enterobacteria_phage_JSE	177.453	Shigella_phage_pSs-1
Enterobacteria_phage_JSE	175.872	Escherichia_phage_wV7
Enterobacteria_phage_JSE	151.942	Acinetobacter_phage_133
Enterobacteria_phage_JSE	11.6238	Sphingomonas_phage_PAU
Enterobacteria_phage_JSE	152.804	Stenotrophomonas_phage_IME13
Enterobacteria_phage_JSE	182.138	Escherichia_phage_slur07
Enterobacteria_phage_JSE	1.7521	Staphylococcus_phage_SA1
Enterobacteria_phage_JSE	2.28253	Salmonella_phage_SSU5
Citrobacter_phage_Miller	152.029	Enterobacteria_phage_CC31
Citrobacter_phage_Miller	28.2434	Rhizobium_phage_vB_RleM_P10VF
Citrobacter_phage_Miller	155.416	Escherichia_phage_wV7
Citrobacter_phage_Miller	300	Cronobacter_phage_vB_CsaM_GAP161
Citrobacter_phage_Miller	153.782	Enterobacteria_phage_RB32
Citrobacter_phage_Miller	300	Klebsiella_phage_KP15
Citrobacter_phage_Miller	154.586	Escherichia_phage_slur07
Citrobacter_phage_Miller	12.8516	Sphingomonas_phage_PAU
Citrobacter_phage_Miller	156.83	Shigella_phage_pSs-1
Citrobacter_phage_Miller	151.649	Enterobacteria_phage_AR1
Citrobacter_phage_Miller	143.117	Stenotrophomonas_phage_IME13
Citrobacter_phage_Miller	125.694	Acinetobacter_phage_133
Citrobacter_phage_Miller	150.204	Enterobacteria_phage_JSE
Citrobacter_phage_Miller	4.36558	Staphylococcus_phage_SA1
Enterobacteria_phage_IME08	175.818	Enterobacteria_phage_JSE
Enterobacteria_phage_IME08	182.784	Stenotrophomonas_phage_IME13
Enterobacteria_phage_IME08	300	Escherichia_phage_slur07
Enterobacteria_phage_IME08	155.42	Cronobacter_phage_vB_CsaM_GAP161
Enterobacteria_phage_IME08	300	Enterobacteria_phage_RB32
Enterobacteria_phage_IME08	152.777	Citrobacter_phage_Miller
Enterobacteria_phage_IME08	161.14	Klebsiella_phage_KP15
Enterobacteria_phage_IME08	12.473	Sphingomonas_phage_PAU
Enterobacteria_phage_IME08	26.5398	Rhizobium_phage_vB_RleM_P10VF
Enterobacteria_phage_IME08	300	Escherichia_phage_wV7
Enterobacteria_phage_IME08	300	Enterobacteria_phage_AR1
Enterobacteria_phage_IME08	300	Shigella_phage_pSs-1
Enterobacteria_phage_IME08	268.823	Enterobacteria_phage_CC31
Enterobacteria_phage_IME08	182.7	Acinetobacter_phage_133
Escherichia_phage_ECML-134	300	Shigella_phage_pSs-1
Escherichia_phage_ECML-134	300	Enterobacteria_phage_IME08
Escherichia_phage_ECML-134	158.657	Cronobacter_phage_vB_CsaM_GAP161
Escherichia_phage_ECML-134	22.7319	Rhizobium_phage_vB_RleM_P10VF
Escherichia_phage_ECML-134	153.782	Citrobacter_phage_Miller
Escherichia_phage_ECML-134	169.003	Stenotrophomonas_phage_IME13
Escherichia_phage_ECML-134	9.45137	Sphingomonas_phage_PAU
Escherichia_phage_ECML-134	162.188	Klebsiella_phage_KP15
Escherichia_phage_ECML-134	300	Enterobacteria_phage_RB32
Escherichia_phage_ECML-134	300	Escherichia_phage_slur07
Escherichia_phage_ECML-134	300	Escherichia_phage_wV7
Escherichia_phage_ECML-134	178.87	Enterobacteria_phage_JSE
Escherichia_phage_ECML-134	181.121	Acinetobacter_phage_133
Escherichia_phage_ECML-134	300	Enterobacteria_phage_AR1
Escherichia_phage_ECML-134	300	Enterobacteria_phage_CC31
Aeromonas_phage_Aeh1	117.871	Enterobacteria_phage_JSE
Aeromonas_phage_Aeh1	120.06	Enterobacteria_phage_IME08
Aeromonas_phage_Aeh1	121.034	Escherichia_phage_ECML-134
Aeromonas_phage_Aeh1	128.236	Stenotrophomonas_phage_IME13
Aeromonas_phage_Aeh1	113.367	Acinetobacter_phage_133
Aeromonas_phage_Aeh1	22.0363	Rhizobium_phage_vB_RleM_P10VF
Aeromonas_phage_Aeh1	123.175	Klebsiella_phage_KP15
Aeromonas_phage_Aeh1	119.172	Enterobacteria_phage_AR1
Aeromonas_phage_Aeh1	121.476	Enterobacteria_phage_CC31
Aeromonas_phage_Aeh1	121.815	Citrobacter_phage_Miller
Aeromonas_phage_Aeh1	124.147	Cronobacter_phage_vB_CsaM_GAP161
Aeromonas_phage_Aeh1	123.027	Enterobacteria_phage_RB32
Aeromonas_phage_Aeh1	121.734	Shigella_phage_pSs-1
Aeromonas_phage_Aeh1	123.737	Escherichia_phage_slur07
Aeromonas_phage_Aeh1	120.517	Escherichia_phage_wV7
Aeromonas_phage_Aeh1	8.32587	Sphingomonas_phage_PAU
Aeromonas_phage_Aeh1	3.25902	Staphylococcus_phage_SA1
Pectobacterium_bacteriophage_PM2	300	Escherichia_phage_slur07
Pectobacterium_bacteriophage_PM2	300	Enterobacteria_phage_CC31
Pectobacterium_bacteriophage_PM2	145.459	Citrobacter_phage_Miller
Pectobacterium_bacteriophage_PM2	300	Shigella_phage_pSs-1
Pectobacterium_bacteriophage_PM2	148.006	Cronobacter_phage_vB_CsaM_GAP161
Pectobacterium_bacteriophage_PM2	153.625	Klebsiella_phage_KP15
Pectobacterium_bacteriophage_PM2	300	Enterobacteria_phage_IME08
Pectobacterium_bacteriophage_PM2	158.587	Enterobacteria_phage_JSE
Pectobacterium_bacteriophage_PM2	115.62	Aeromonas_phage_Aeh1
Pectobacterium_bacteriophage_PM2	300	Escherichia_phage_wV7
Pectobacterium_bacteriophage_PM2	177.783	Stenotrophomonas_phage_IME13
Pectobacterium_bacteriophage_PM2	299.384	Escherichia_phage_ECML-134
Pectobacterium_bacteriophage_PM2	14.8431	Sphingomonas_phage_PAU
Pectobacterium_bacteriophage_PM2	23.1865	Rhizobium_phage_vB_RleM_P10VF
Pectobacterium_bacteriophage_PM2	300	Enterobacteria_phage_AR1
Pectobacterium_bacteriophage_PM2	178.942	Acinetobacter_phage_133
Pectobacterium_bacteriophage_PM2	300	Enterobacteria_phage_RB32
Aeromonas_phage_CC2	16.9978	Rhizobium_phage_vB_RleM_P10VF
Aeromonas_phage_CC2	153.423	Aeromonas_phage_Aeh1
Aeromonas_phage_CC2	107.995	Cronobacter_phage_vB_CsaM_GAP161
Aeromonas_phage_CC2	113.264	Shigella_phage_pSs-1
Aeromonas_phage_CC2	109.517	Citrobacter_phage_Miller
Aeromonas_phage_CC2	100.354	Enterobacteria_phage_JSE
Aeromonas_phage_CC2	119.489	Enterobacteria_phage_IME08
Aeromonas_phage_CC2	112.566	Escherichia_phage_ECML-134
Aeromonas_phage_CC2	115.157	Escherichia_phage_slur07
Aeromonas_phage_CC2	112.051	Escherichia_phage_wV7
Aeromonas_phage_CC2	6.68331	Sphingomonas_phage_PAU
Aeromonas_phage_CC2	114.45	Enterobacteria_phage_RB32
Aeromonas_phage_CC2	128.944	Stenotrophomonas_phage_IME13
Aeromonas_phage_CC2	112.796	Klebsiella_phage_KP15
Aeromonas_phage_CC2	116.492	Pectobacterium_bacteriophage_PM2
Aeromonas_phage_CC2	112.569	Enterobacteria_phage_AR1
Aeromonas_phage_CC2	112.904	Enterobacteria_phage_CC31
Aeromonas_phage_CC2	99.8726	Acinetobacter_phage_133
Aeromonas_phage_CC2	1.24459	Staphylococcus_phage_SA1
Shigella_phage_Shfl2	22.9712	Rhizobium_phage_vB_RleM_P10VF
Shigella_phage_Shfl2	113.441	Aeromonas_phage_CC2
Shigella_phage_Shfl2	294.455	Enterobacteria_phage_CC31
Shigella_phage_Shfl2	300	Escherichia_phage_ECML-134
Shigella_phage_Shfl2	154.789	Citrobacter_phage_Miller
Shigella_phage_Shfl2	169.963	Stenotrophomonas_phage_IME13
Shigella_phage_Shfl2	300	Shigella_phage_pSs-1
Shigella_phage_Shfl2	163.222	Klebsiella_phage_KP15
Shigella_phage_Shfl2	300	Escherichia_phage_slur07
Shigella_phage_Shfl2	300	Pectobacterium_bacteriophage_PM2
Shigella_phage_Shfl2	159.69	Cronobacter_phage_vB_CsaM_GAP161
Shigella_phage_Shfl2	300	Enterobacteria_phage_RB32
Shigella_phage_Shfl2	121.911	Aeromonas_phage_Aeh1
Shigella_phage_Shfl2	300	Escherichia_phage_wV7
Shigella_phage_Shfl2	300	Enterobacteria_phage_IME08
Shigella_phage_Shfl2	177.498	Acinetobacter_phage_133
Shigella_phage_Shfl2	300	Enterobacteria_phage_AR1
Shigella_phage_Shfl2	180.024	Enterobacteria_phage_JSE
Shigella_phage_Shfl2	9.6087	Sphingomonas_phage_PAU
Enterobacteria_phage_T4	300	Escherichia_phage_ECML-134
Enterobacteria_phage_T4	119.671	Aeromonas_phage_Aeh1
Enterobacteria_phage_T4	278.839	Enterobacteria_phage_CC31
Enterobacteria_phage_T4	158.311	Klebsiella_phage_KP15
Enterobacteria_phage_T4	300	Shigella_phage_Shfl2
Enterobacteria_phage_T4	23.7904	Rhizobium_phage_vB_RleM_P10VF
Enterobacteria_phage_T4	300	Enterobacteria_phage_IME08
Enterobacteria_phage_T4	296.354	Pectobacterium_bacteriophage_PM2
Enterobacteria_phage_T4	107.505	Aeromonas_phage_CC2
Enterobacteria_phage_T4	154.826	Cronobacter_phage_vB_CsaM_GAP161
Enterobacteria_phage_T4	300	Escherichia_phage_slur07
Enterobacteria_phage_T4	300	Shigella_phage_pSs-1
Enterobacteria_phage_T4	152.22	Citrobacter_phage_Miller
Enterobacteria_phage_T4	300	Enterobacteria_phage_RB32
Enterobacteria_phage_T4	300	Escherichia_phage_wV7
Enterobacteria_phage_T4	170.035	Stenotrophomonas_phage_IME13
Enterobacteria_phage_T4	300	Enterobacteria_phage_AR1
Enterobacteria_phage_T4	176.999	Acinetobacter_phage_133
Enterobacteria_phage_T4	174.775	Enterobacteria_phage_JSE
Enterobacteria_phage_T4	9.20625	Sphingomonas_phage_PAU
Enterobacteria_phage_vB_EcoM_VR26	145.459	Citrobacter_phage_Miller
Enterobacteria_phage_vB_EcoM_VR26	300	Pectobacterium_bacteriophage_PM2
Enterobacteria_phage_vB_EcoM_VR26	148.006	Cronobacter_phage_vB_CsaM_GAP161
Enterobacteria_phage_vB_EcoM_VR26	300	Enterobacteria_phage_IME08
Enterobacteria_phage_vB_EcoM_VR26	155.858	Klebsiella_phage_KP15
Enterobacteria_phage_vB_EcoM_VR26	300	Shigella_phage_pSs-1
Enterobacteria_phage_vB_EcoM_VR26	23.1865	Rhizobium_phage_vB_RleM_P10VF
Enterobacteria_phage_vB_EcoM_VR26	300	Enterobacteria_phage_RB32
Enterobacteria_phage_vB_EcoM_VR26	277.194	Enterobacteria_phage_CC31
Enterobacteria_phage_vB_EcoM_VR26	300	Enterobacteria_phage_AR1
Enterobacteria_phage_vB_EcoM_VR26	183.627	Acinetobacter_phage_133
Enterobacteria_phage_vB_EcoM_VR26	113.692	Aeromonas_phage_Aeh1
Enterobacteria_phage_vB_EcoM_VR26	167.519	Enterobacteria_phage_JSE
Enterobacteria_phage_vB_EcoM_VR26	300	Shigella_phage_Shfl2
Enterobacteria_phage_vB_EcoM_VR26	300	Escherichia_phage_slur07
Enterobacteria_phage_vB_EcoM_VR26	300	Escherichia_phage_wV7
Enterobacteria_phage_vB_EcoM_VR26	8.82421	Sphingomonas_phage_PAU
Enterobacteria_phage_vB_EcoM_VR26	175.242	Stenotrophomonas_phage_IME13
Enterobacteria_phage_vB_EcoM_VR26	300	Escherichia_phage_ECML-134
Enterobacteria_phage_vB_EcoM_VR26	300	Enterobacteria_phage_T4
Enterobacteria_phage_vB_EcoM_VR26	118.36	Aeromonas_phage_CC2
Aeromonas_phage_Aes012	175.393	Pectobacterium_bacteriophage_PM2
Aeromonas_phage_Aes012	176.4	Enterobacteria_phage_IME08
Aeromonas_phage_Aes012	147.326	Acinetobacter_phage_133
Aeromonas_phage_Aes012	143.991	Cronobacter_phage_vB_CsaM_GAP161
Aeromonas_phage_Aes012	148.129	Enterobacteria_phage_JSE
Aeromonas_phage_Aes012	165.566	Escherichia_phage_ECML-134
Aeromonas_phage_Aes012	167.913	Enterobacteria_phage_RB32
Aeromonas_phage_Aes012	11.5862	Sphingomonas_phage_PAU
Aeromonas_phage_Aes012	141.582	Aeromonas_phage_CC2
Aeromonas_phage_Aes012	166.601	Shigella_phage_Shfl2
Aeromonas_phage_Aes012	162.628	Escherichia_phage_wV7
Aeromonas_phage_Aes012	25.5844	Rhizobium_phage_vB_RleM_P10VF
Aeromonas_phage_Aes012	119.9	Aeromonas_phage_Aeh1
Aeromonas_phage_Aes012	166.076	Enterobacteria_phage_vB_EcoM_VR26
Aeromonas_phage_Aes012	159.337	Enterobacteria_phage_T4
Aeromonas_phage_Aes012	139.186	Citrobacter_phage_Miller
Aeromonas_phage_Aes012	300	Stenotrophomonas_phage_IME13
Aeromonas_phage_Aes012	168.749	Escherichia_phage_slur07
Aeromonas_phage_Aes012	140.329	Klebsiella_phage_KP15
Aeromonas_phage_Aes012	164.044	Shigella_phage_pSs-1
Aeromonas_phage_Aes012	166.089	Enterobacteria_phage_CC31
Aeromonas_phage_Aes012	163.375	Enterobacteria_phage_AR1
Enterobacteria_phage_QL01	23.9342	Rhizobium_phage_vB_RleM_P10VF
Enterobacteria_phage_QL01	156.627	Klebsiella_phage_KP15
Enterobacteria_phage_QL01	115.463	Aeromonas_phage_CC2
Enterobacteria_phage_QL01	300	Enterobacteria_phage_vB_EcoM_VR26
Enterobacteria_phage_QL01	300	Enterobacteria_phage_IME08
Enterobacteria_phage_QL01	171.589	Aeromonas_phage_Aes012
Enterobacteria_phage_QL01	300	Escherichia_phage_wV7
Enterobacteria_phage_QL01	300	Shigella_phage_pSs-1
Enterobacteria_phage_QL01	300	Pectobacterium_bacteriophage_PM2
Enterobacteria_phage_QL01	277.182	Enterobacteria_phage_CC31
Enterobacteria_phage_QL01	118.204	Aeromonas_phage_Aeh1
Enterobacteria_phage_QL01	152.799	Citrobacter_phage_Miller
Enterobacteria_phage_QL01	300	Escherichia_phage_ECML-134
Enterobacteria_phage_QL01	153.186	Cronobacter_phage_vB_CsaM_GAP161
Enterobacteria_phage_QL01	300	Shigella_phage_Shfl2
Enterobacteria_phage_QL01	300	Enterobacteria_phage_T4
Enterobacteria_phage_QL01	168.544	Enterobacteria_phage_JSE
Enterobacteria_phage_QL01	178.256	Stenotrophomonas_phage_IME13
Enterobacteria_phage_QL01	177.647	Acinetobacter_phage_133
Enterobacteria_phage_QL01	11.6914	Sphingomonas_phage_PAU
Enterobacteria_phage_QL01	300	Escherichia_phage_slur07
Enterobacteria_phage_QL01	300	Enterobacteria_phage_AR1
Enterobacteria_phage_QL01	300	Enterobacteria_phage_RB32
Salmonella_phage_STML-198	300	Enterobacteria_phage_RB32
Salmonella_phage_STML-198	291.407	Enterobacteria_phage_QL01
Salmonella_phage_STML-198	297.08	Enterobacteria_phage_vB_EcoM_VR26
Salmonella_phage_STML-198	154.995	Cronobacter_phage_vB_CsaM_GAP161
Salmonella_phage_STML-198	123.73	Aeromonas_phage_Aeh1
Salmonella_phage_STML-198	300	Escherichia_phage_ECML-134
Salmonella_phage_STML-198	288.216	Enterobacteria_phage_IME08
Salmonella_phage_STML-198	143.432	Citrobacter_phage_Miller
Salmonella_phage_STML-198	300	Escherichia_phage_wV7
Salmonella_phage_STML-198	300	Enterobacteria_phage_CC31
Salmonella_phage_STML-198	300	Shigella_phage_pSs-1
Salmonella_phage_STML-198	293.154	Enterobacteria_phage_T4
Salmonella_phage_STML-198	158.395	Klebsiella_phage_KP15
Salmonella_phage_STML-198	300	Shigella_phage_Shfl2
Salmonella_phage_STML-198	23.4652	Rhizobium_phage_vB_RleM_P10VF
Salmonella_phage_STML-198	159.297	Aeromonas_phage_Aes012
Salmonella_phage_STML-198	291.533	Pectobacterium_bacteriophage_PM2
Salmonella_phage_STML-198	169.384	Stenotrophomonas_phage_IME13
Salmonella_phage_STML-198	11.1544	Sphingomonas_phage_PAU
Salmonella_phage_STML-198	177.416	Acinetobacter_phage_133
Salmonella_phage_STML-198	177.692	Enterobacteria_phage_JSE
Salmonella_phage_STML-198	300	Enterobacteria_phage_AR1
Salmonella_phage_STML-198	300	Escherichia_phage_slur07
Salmonella_phage_STML-198	115.254	Aeromonas_phage_CC2
Salmonella_phage_STML-198	2.06383	Staphylococcus_phage_SA1
Escherichia_phage_vB_EcoM_JS09	150.972	Citrobacter_phage_Miller
Escherichia_phage_vB_EcoM_JS09	154.752	Klebsiella_phage_KP15
Escherichia_phage_vB_EcoM_JS09	300	Enterobacteria_phage_IME08
Escherichia_phage_vB_EcoM_JS09	153.576	Cronobacter_phage_vB_CsaM_GAP161
Escherichia_phage_vB_EcoM_JS09	300	Shigella_phage_pSs-1
Escherichia_phage_vB_EcoM_JS09	164.958	Aeromonas_phage_Aes012
Escherichia_phage_vB_EcoM_JS09	300	Shigella_phage_Shfl2
Escherichia_phage_vB_EcoM_JS09	300	Enterobacteria_phage_T4
Escherichia_phage_vB_EcoM_JS09	176.077	Stenotrophomonas_phage_IME13
Escherichia_phage_vB_EcoM_JS09	12.9943	Sphingomonas_phage_PAU
Escherichia_phage_vB_EcoM_JS09	117.705	Aeromonas_phage_CC2
Escherichia_phage_vB_EcoM_JS09	300	Escherichia_phage_slur07
Escherichia_phage_vB_EcoM_JS09	294.922	Salmonella_phage_STML-198
Escherichia_phage_vB_EcoM_JS09	283.278	Enterobacteria_phage_CC31
Escherichia_phage_vB_EcoM_JS09	300	Enterobacteria_phage_vB_EcoM_VR26
Escherichia_phage_vB_EcoM_JS09	300	Escherichia_phage_wV7
Escherichia_phage_vB_EcoM_JS09	300	Pectobacterium_bacteriophage_PM2
Escherichia_phage_vB_EcoM_JS09	300	Enterobacteria_phage_AR1
Escherichia_phage_vB_EcoM_JS09	175.729	Acinetobacter_phage_133
Escherichia_phage_vB_EcoM_JS09	118.54	Aeromonas_phage_Aeh1
Escherichia_phage_vB_EcoM_JS09	300	Enterobacteria_phage_RB32
Escherichia_phage_vB_EcoM_JS09	300	Enterobacteria_phage_QL01
Escherichia_phage_vB_EcoM_JS09	300	Escherichia_phage_ECML-134
Escherichia_phage_vB_EcoM_JS09	171.262	Enterobacteria_phage_JSE
Escherichia_phage_vB_EcoM_JS09	24.031	Rhizobium_phage_vB_RleM_P10VF
Enterobacteria_phage_RB51	300	Escherichia_phage_wV7
Enterobacteria_phage_RB51	300	Shigella_phage_pSs-1
Enterobacteria_phage_RB51	122.503	Aeromonas_phage_Aeh1
Enterobacteria_phage_RB51	24.031	Rhizobium_phage_vB_RleM_P10VF
Enterobacteria_phage_RB51	160.299	Cronobacter_phage_vB_CsaM_GAP161
Enterobacteria_phage_RB51	300	Escherichia_phage_ECML-134
Enterobacteria_phage_RB51	167.297	Aeromonas_phage_Aes012
Enterobacteria_phage_RB51	300	Escherichia_phage_vB_EcoM_JS09
Enterobacteria_phage_RB51	300	Enterobacteria_phage_vB_EcoM_VR26
Enterobacteria_phage_RB51	112.051	Aeromonas_phage_CC2
Enterobacteria_phage_RB51	300	Enterobacteria_phage_IME08
Enterobacteria_phage_RB51	296.961	Enterobacteria_phage_CC31
Enterobacteria_phage_RB51	300	Salmonella_phage_STML-198
Enterobacteria_phage_RB51	300	Enterobacteria_phage_AR1
Enterobacteria_phage_RB51	300	Pectobacterium_bacteriophage_PM2
Enterobacteria_phage_RB51	300	Escherichia_phage_slur07
Enterobacteria_phage_RB51	300	Enterobacteria_phage_RB32
Enterobacteria_phage_RB51	300	Shigella_phage_Shfl2
Enterobacteria_phage_RB51	300	Enterobacteria_phage_QL01
Enterobacteria_phage_RB51	300	Enterobacteria_phage_T4
Enterobacteria_phage_RB51	9.35851	Sphingomonas_phage_PAU
Enterobacteria_phage_RB51	173.518	Stenotrophomonas_phage_IME13
Enterobacteria_phage_RB51	155.416	Citrobacter_phage_Miller
Enterobacteria_phage_RB51	178.084	Acinetobacter_phage_133
Enterobacteria_phage_RB51	161.58	Klebsiella_phage_KP15
Enterobacteria_phage_RB51	180.519	Enterobacteria_phage_JSE
Aeromonas_phage_Aes508	11.9258	Sphingomonas_phage_PAU
Aeromonas_phage_Aes508	26.092	Rhizobium_phage_vB_RleM_P10VF
Aeromonas_phage_Aes508	160.076	Escherichia_phage_vB_EcoM_JS09
Aeromonas_phage_Aes508	160.663	Enterobacteria_phage_RB32
Aeromonas_phage_Aes508	136.915	Cronobacter_phage_vB_CsaM_GAP161
Aeromonas_phage_Aes508	157.749	Enterobacteria_phage_RB51
Aeromonas_phage_Aes508	160.663	Escherichia_phage_ECML-134
Aeromonas_phage_Aes508	117.554	Aeromonas_phage_Aeh1
Aeromonas_phage_Aes508	165.961	Pectobacterium_bacteriophage_PM2
Aeromonas_phage_Aes508	300	Aeromonas_phage_Aes012
Aeromonas_phage_Aes508	156.776	Shigella_phage_pSs-1
Aeromonas_phage_Aes508	162.023	Enterobacteria_phage_QL01
Aeromonas_phage_Aes508	139.89	Klebsiella_phage_KP15
Aeromonas_phage_Aes508	168.942	Enterobacteria_phage_IME08
Aeromonas_phage_Aes508	161.251	Enterobacteria_phage_CC31
Aeromonas_phage_Aes508	155.431	Escherichia_phage_wV7
Aeromonas_phage_Aes508	131.392	Aeromonas_phage_CC2
Aeromonas_phage_Aes508	134.363	Citrobacter_phage_Miller
Aeromonas_phage_Aes508	159.017	Enterobacteria_phage_vB_EcoM_VR26
Aeromonas_phage_Aes508	161.457	Escherichia_phage_slur07
Aeromonas_phage_Aes508	300	Stenotrophomonas_phage_IME13
Aeromonas_phage_Aes508	154.496	Enterobacteria_phage_T4
Aeromonas_phage_Aes508	159.31	Shigella_phage_Shfl2
Aeromonas_phage_Aes508	147.818	Enterobacteria_phage_JSE
Aeromonas_phage_Aes508	158.552	Enterobacteria_phage_AR1
Aeromonas_phage_Aes508	146.932	Acinetobacter_phage_133
Aeromonas_phage_Aes508	158.984	Salmonella_phage_STML-198
Yersinia_phage_phiR1-RT	164.875	Aeromonas_phage_Aes012
Yersinia_phage_phiR1-RT	259.29	Enterobacteria_phage_vB_EcoM_VR26
Yersinia_phage_phiR1-RT	300	Pectobacterium_bacteriophage_PM2
Yersinia_phage_phiR1-RT	286.635	Escherichia_phage_vB_EcoM_JS09
Yersinia_phage_phiR1-RT	274.466	Enterobacteria_phage_IME08
Yersinia_phage_phiR1-RT	251.1	Shigella_phage_pSs-1
Yersinia_phage_phiR1-RT	166.775	Enterobacteria_phage_JSE
Yersinia_phage_phiR1-RT	26.0561	Rhizobium_phage_vB_RleM_P10VF
Yersinia_phage_phiR1-RT	187.78	Acinetobacter_phage_133
Yersinia_phage_phiR1-RT	254.198	Enterobacteria_phage_RB51
Yersinia_phage_phiR1-RT	13.3987	Sphingomonas_phage_PAU
Yersinia_phage_phiR1-RT	251.56	Escherichia_phage_wV7
Yersinia_phage_phiR1-RT	276.377	Enterobacteria_phage_CC31
Yersinia_phage_phiR1-RT	256.413	Escherichia_phage_slur07
Yersinia_phage_phiR1-RT	145.611	Klebsiella_phage_KP15
Yersinia_phage_phiR1-RT	162.267	Aeromonas_phage_Aes508
Yersinia_phage_phiR1-RT	142.072	Citrobacter_phage_Miller
Yersinia_phage_phiR1-RT	244.829	Enterobacteria_phage_T4
Yersinia_phage_phiR1-RT	251.417	Shigella_phage_Shfl2
Yersinia_phage_phiR1-RT	249.153	Enterobacteria_phage_AR1
Yersinia_phage_phiR1-RT	270.982	Salmonella_phage_STML-198
Yersinia_phage_phiR1-RT	117.79	Aeromonas_phage_CC2
Yersinia_phage_phiR1-RT	175.686	Stenotrophomonas_phage_IME13
Yersinia_phage_phiR1-RT	255.137	Enterobacteria_phage_RB32
Yersinia_phage_phiR1-RT	255.137	Escherichia_phage_ECML-134
Yersinia_phage_phiR1-RT	144.633	Cronobacter_phage_vB_CsaM_GAP161
Yersinia_phage_phiR1-RT	114.486	Aeromonas_phage_Aeh1
Yersinia_phage_phiR1-RT	277.711	Enterobacteria_phage_QL01
Acinetobacter_phage_ZZ1	107.646	Aeromonas_phage_Aeh1
Acinetobacter_phage_ZZ1	12.3621	Sphingomonas_phage_PAU
Acinetobacter_phage_ZZ1	156.755	Aeromonas_phage_Aes012
Acinetobacter_phage_ZZ1	21.9615	Rhizobium_phage_vB_RleM_P10VF
Acinetobacter_phage_ZZ1	181.527	Pectobacterium_bacteriophage_PM2
Acinetobacter_phage_ZZ1	185.61	Yersinia_phage_phiR1-RT
Acinetobacter_phage_ZZ1	181.527	Enterobacteria_phage_vB_EcoM_VR26
Acinetobacter_phage_ZZ1	101.884	Aeromonas_phage_CC2
Acinetobacter_phage_ZZ1	180.69	Escherichia_phage_vB_EcoM_JS09
Acinetobacter_phage_ZZ1	175.141	Shigella_phage_pSs-1
Acinetobacter_phage_ZZ1	185.363	Enterobacteria_phage_IME08
Acinetobacter_phage_ZZ1	176.62	Escherichia_phage_ECML-134
Acinetobacter_phage_ZZ1	126.19	Cronobacter_phage_vB_CsaM_GAP161
Acinetobacter_phage_ZZ1	164.089	Stenotrophomonas_phage_IME13
Acinetobacter_phage_ZZ1	177.885	Enterobacteria_phage_QL01
Acinetobacter_phage_ZZ1	177.648	Salmonella_phage_STML-198
Acinetobacter_phage_ZZ1	173.615	Escherichia_phage_wV7
Acinetobacter_phage_ZZ1	291.977	Acinetobacter_phage_133
Acinetobacter_phage_ZZ1	174.261	Enterobacteria_phage_AR1
Acinetobacter_phage_ZZ1	175.964	Enterobacteria_phage_RB51
Acinetobacter_phage_ZZ1	135.614	Klebsiella_phage_KP15
Acinetobacter_phage_ZZ1	154.085	Aeromonas_phage_Aes508
Acinetobacter_phage_ZZ1	181.738	Enterobacteria_phage_CC31
Acinetobacter_phage_ZZ1	175.141	Escherichia_phage_slur07
Acinetobacter_phage_ZZ1	177.734	Shigella_phage_Shfl2
Acinetobacter_phage_ZZ1	125.87	Citrobacter_phage_Miller
Acinetobacter_phage_ZZ1	172.557	Enterobacteria_phage_T4
Acinetobacter_phage_ZZ1	176.62	Enterobacteria_phage_RB32
Acinetobacter_phage_ZZ1	145.449	Enterobacteria_phage_JSE
Campylobacter_phage_CP30A	21.0257	Yersinia_phage_phiR1-RT
Campylobacter_phage_CP30A	18.3974	Pectobacterium_bacteriophage_PM2
Campylobacter_phage_CP30A	18.3974	Enterobacteria_phage_vB_EcoM_VR26
Campylobacter_phage_CP30A	17.4457	Cronobacter_phage_vB_CsaM_GAP161
Campylobacter_phage_CP30A	19.8124	Enterobacteria_phage_IME08
Campylobacter_phage_CP30A	19.1529	Escherichia_phage_ECML-134
Campylobacter_phage_CP30A	15.9342	Aeromonas_phage_CC2
Campylobacter_phage_CP30A	19.0412	Escherichia_phage_vB_EcoM_JS09
Campylobacter_phage_CP30A	18.1368	Acinetobacter_phage_ZZ1
Campylobacter_phage_CP30A	12.1341	Rhizobium_phage_vB_RleM_P10VF
Campylobacter_phage_CP30A	15.5546	Aeromonas_phage_Aes012
Campylobacter_phage_CP30A	19.3764	Aeromonas_phage_Aeh1
Campylobacter_phage_CP30A	19.304	Shigella_phage_pSs-1
Campylobacter_phage_CP30A	18.9675	Enterobacteria_phage_QL01
Campylobacter_phage_CP30A	19.1529	Enterobacteria_phage_RB32
Campylobacter_phage_CP30A	18.8943	Enterobacteria_phage_JSE
Campylobacter_phage_CP30A	18.1747	Salmonella_phage_STML-198
Campylobacter_phage_CP30A	19.0412	Enterobacteria_phage_RB51
Campylobacter_phage_CP30A	18.3164	Stenotrophomonas_phage_IME13
Campylobacter_phage_CP30A	18.7496	Enterobacteria_phage_AR1
Campylobacter_phage_CP30A	5.80853	Sphingomonas_phage_PAU
Campylobacter_phage_CP30A	17.3759	Citrobacter_phage_Miller
Campylobacter_phage_CP30A	15.8859	Aeromonas_phage_Aes508
Campylobacter_phage_CP30A	18.8217	Enterobacteria_phage_CC31
Campylobacter_phage_CP30A	18.0615	Klebsiella_phage_KP15
Campylobacter_phage_CP30A	21.2304	Acinetobacter_phage_133
Campylobacter_phage_CP30A	19.0412	Escherichia_phage_wV7
Campylobacter_phage_CP30A	18.8579	Enterobacteria_phage_T4
Campylobacter_phage_CP30A	19.3421	Shigella_phage_Shfl2
Campylobacter_phage_CP30A	19.304	Escherichia_phage_slur07
Vibrio_phage_henriette_12B8	25.015	Klebsiella_phage_KP15
Vibrio_phage_henriette_12B8	22.6604	Cronobacter_phage_vB_CsaM_GAP161
Vibrio_phage_henriette_12B8	21.2614	Enterobacteria_phage_RB32
Vibrio_phage_henriette_12B8	21.953	Enterobacteria_phage_IME08
Vibrio_phage_henriette_12B8	20.9519	Enterobacteria_phage_T4
Vibrio_phage_henriette_12B8	21.1442	Escherichia_phage_wV7
Vibrio_phage_henriette_12B8	20.9139	Enterobacteria_phage_CC31
Vibrio_phage_henriette_12B8	21.4198	Shigella_phage_pSs-1
Vibrio_phage_henriette_12B8	21.4598	Shigella_phage_Shfl2
Vibrio_phage_henriette_12B8	21.0668	Enterobacteria_phage_QL01
Vibrio_phage_henriette_12B8	18.6409	Acinetobacter_phage_ZZ1
Vibrio_phage_henriette_12B8	17.9153	Aeromonas_phage_Aes508
Vibrio_phage_henriette_12B8	21.8691	Salmonella_phage_STML-198
Vibrio_phage_henriette_12B8	21.1442	Escherichia_phage_vB_EcoM_JS09
Vibrio_phage_henriette_12B8	22.0356	Enterobacteria_phage_vB_EcoM_VR26
Vibrio_phage_henriette_12B8	17.5654	Aeromonas_phage_Aes012
Vibrio_phage_henriette_12B8	4.32599	Rhizobium_phage_vB_RleM_P10VF
Vibrio_phage_henriette_12B8	18.4165	Yersinia_phage_phiR1-RT
Vibrio_phage_henriette_12B8	24.1924	Citrobacter_phage_Miller
Vibrio_phage_henriette_12B8	21.1442	Enterobacteria_phage_RB51
Vibrio_phage_henriette_12B8	8.19024	Campylobacter_phage_CP30A
Vibrio_phage_henriette_12B8	22.1527	Aeromonas_phage_CC2
Vibrio_phage_henriette_12B8	21.2614	Escherichia_phage_ECML-134
Vibrio_phage_henriette_12B8	20.1827	Acinetobacter_phage_133
Vibrio_phage_henriette_12B8	21.4198	Escherichia_phage_slur07
Vibrio_phage_henriette_12B8	20.4814	Stenotrophomonas_phage_IME13
Vibrio_phage_henriette_12B8	20.8383	Enterobacteria_phage_AR1
Vibrio_phage_henriette_12B8	21.4502	Aeromonas_phage_Aeh1
Vibrio_phage_henriette_12B8	1.31331	Sphingomonas_phage_PAU
Vibrio_phage_henriette_12B8	22.5802	Enterobacteria_phage_JSE
Vibrio_phage_henriette_12B8	20.4689	Pectobacterium_bacteriophage_PM2
Vibrio_phage_henriette_12B8	2.83784	Pseudoalteromonas_phage_pYD6-A
Vibrio_phage_henriette_12B8	1.8946	Salmonella_phage_SSU5
Enterobacteria_phage_RB68	300	Escherichia_phage_vB_EcoM_JS09
Enterobacteria_phage_RB68	300	Enterobacteria_phage_IME08
Enterobacteria_phage_RB68	166.689	Aeromonas_phage_Aes012
Enterobacteria_phage_RB68	300	Shigella_phage_pSs-1
Enterobacteria_phage_RB68	300	Enterobacteria_phage_vB_EcoM_VR26
Enterobacteria_phage_RB68	253.274	Yersinia_phage_phiR1-RT
Enterobacteria_phage_RB68	159.692	Cronobacter_phage_vB_CsaM_GAP161
Enterobacteria_phage_RB68	177.43	Acinetobacter_phage_133
Enterobacteria_phage_RB68	300	Shigella_phage_Shfl2
Enterobacteria_phage_RB68	295.851	Enterobacteria_phage_CC31
Enterobacteria_phage_RB68	300	Enterobacteria_phage_QL01
Enterobacteria_phage_RB68	300	Enterobacteria_phage_AR1
Enterobacteria_phage_RB68	300	Escherichia_phage_ECML-134
Enterobacteria_phage_RB68	121.986	Aeromonas_phage_Aeh1
Enterobacteria_phage_RB68	300	Enterobacteria_phage_RB51
Enterobacteria_phage_RB68	21.0284	Vibrio_phage_henriette_12B8
Enterobacteria_phage_RB68	154.824	Citrobacter_phage_Miller
Enterobacteria_phage_RB68	18.9308	Campylobacter_phage_CP30A
Enterobacteria_phage_RB68	157.178	Aeromonas_phage_Aes508
Enterobacteria_phage_RB68	23.886	Rhizobium_phage_vB_RleM_P10VF
Enterobacteria_phage_RB68	300	Enterobacteria_phage_RB32
Enterobacteria_phage_RB68	300	Escherichia_phage_slur07
Enterobacteria_phage_RB68	179.841	Enterobacteria_phage_JSE
Enterobacteria_phage_RB68	300	Enterobacteria_phage_T4
Enterobacteria_phage_RB68	300	Pectobacterium_bacteriophage_PM2
Enterobacteria_phage_RB68	111.543	Aeromonas_phage_CC2
Enterobacteria_phage_RB68	9.26678	Sphingomonas_phage_PAU
Enterobacteria_phage_RB68	160.98	Klebsiella_phage_KP15
Enterobacteria_phage_RB68	300	Escherichia_phage_wV7
Enterobacteria_phage_RB68	300	Salmonella_phage_STML-198
Enterobacteria_phage_RB68	175.318	Acinetobacter_phage_ZZ1
Enterobacteria_phage_RB68	172.946	Stenotrophomonas_phage_IME13
Sinorhizobium_phage_phiM12	30.9598	Enterobacteria_phage_IME08
Sinorhizobium_phage_phiM12	29.9483	Enterobacteria_phage_vB_EcoM_VR26
Sinorhizobium_phage_phiM12	34.5807	Aeromonas_phage_Aes012
Sinorhizobium_phage_phiM12	30.104	Shigella_phage_pSs-1
Sinorhizobium_phage_phiM12	29.9483	Pectobacterium_bacteriophage_PM2
Sinorhizobium_phage_phiM12	25.5579	Escherichia_phage_vB_EcoM_JS09
Sinorhizobium_phage_phiM12	30.9323	Enterobacteria_phage_QL01
Sinorhizobium_phage_phiM12	30.8058	Enterobacteria_phage_JSE
Sinorhizobium_phage_phiM12	29.8501	Enterobacteria_phage_RB32
Sinorhizobium_phage_phiM12	38.7106	Aeromonas_phage_Aeh1
Sinorhizobium_phage_phiM12	29.4771	Enterobacteria_phage_RB68
Sinorhizobium_phage_phiM12	29.4075	Salmonella_phage_STML-198
Sinorhizobium_phage_phiM12	29.8501	Escherichia_phage_ECML-134
Sinorhizobium_phage_phiM12	11.7671	Campylobacter_phage_CP30A
Sinorhizobium_phage_phiM12	8.31618	Vibrio_phage_henriette_12B8
Sinorhizobium_phage_phiM12	29.6625	Enterobacteria_phage_RB51
Sinorhizobium_phage_phiM12	30.6913	Acinetobacter_phage_133
Sinorhizobium_phage_phiM12	27.922	Enterobacteria_phage_CC31
Sinorhizobium_phage_phiM12	37.8951	Klebsiella_phage_KP15
Sinorhizobium_phage_phiM12	33.7807	Aeromonas_phage_Aes508
Sinorhizobium_phage_phiM12	27.8048	Enterobacteria_phage_AR1
Sinorhizobium_phage_phiM12	40.3924	Stenotrophomonas_phage_IME13
Sinorhizobium_phage_phiM12	27.9418	Acinetobacter_phage_ZZ1
Sinorhizobium_phage_phiM12	29.2778	Rhizobium_phage_vB_RleM_P10VF
Sinorhizobium_phage_phiM12	29.3548	Enterobacteria_phage_T4
Sinorhizobium_phage_phiM12	27.5695	Yersinia_phage_phiR1-RT
Sinorhizobium_phage_phiM12	29.5364	Aeromonas_phage_CC2
Sinorhizobium_phage_phiM12	2.79088	Sphingomonas_phage_PAU
Sinorhizobium_phage_phiM12	30.104	Escherichia_phage_slur07
Sinorhizobium_phage_phiM12	28.2795	Escherichia_phage_wV7
Sinorhizobium_phage_phiM12	35.0592	Citrobacter_phage_Miller
Sinorhizobium_phage_phiM12	36.6452	Cronobacter_phage_vB_CsaM_GAP161
Sinorhizobium_phage_phiM12	28.7702	Shigella_phage_Shfl2
Klebsiella_phage_KP27	160.713	Escherichia_phage_ECML-134
Klebsiella_phage_KP27	162.355	Enterobacteria_phage_RB51
Klebsiella_phage_KP27	139.357	Aeromonas_phage_Aes012
Klebsiella_phage_KP27	120.007	Aeromonas_phage_Aeh1
Klebsiella_phage_KP27	157.501	Enterobacteria_phage_IME08
Klebsiella_phage_KP27	161.74	Enterobacteria_phage_RB68
Klebsiella_phage_KP27	107.831	Aeromonas_phage_CC2
Klebsiella_phage_KP27	28.2967	Rhizobium_phage_vB_RleM_P10VF
Klebsiella_phage_KP27	152.178	Enterobacteria_phage_vB_EcoM_VR26
Klebsiella_phage_KP27	157.85	Escherichia_phage_wV7
Klebsiella_phage_KP27	300	Klebsiella_phage_KP15
Klebsiella_phage_KP27	12.8871	Sphingomonas_phage_PAU
Klebsiella_phage_KP27	17.4107	Campylobacter_phage_CP30A
Klebsiella_phage_KP27	300	Citrobacter_phage_Miller
Klebsiella_phage_KP27	300	Cronobacter_phage_vB_CsaM_GAP161
Klebsiella_phage_KP27	162.978	Enterobacteria_phage_RB32
Klebsiella_phage_KP27	36.5744	Sinorhizobium_phage_phiM12
Klebsiella_phage_KP27	146.661	Yersinia_phage_phiR1-RT
Klebsiella_phage_KP27	130.317	Acinetobacter_phage_ZZ1
Klebsiella_phage_KP27	158.892	Enterobacteria_phage_CC31
Klebsiella_phage_KP27	157.053	Enterobacteria_phage_JSE
Klebsiella_phage_KP27	154.803	Salmonella_phage_STML-198
Klebsiella_phage_KP27	159.282	Shigella_phage_pSs-1
Klebsiella_phage_KP27	132.292	Acinetobacter_phage_133
Klebsiella_phage_KP27	134.528	Aeromonas_phage_Aes508
Klebsiella_phage_KP27	140.884	Stenotrophomonas_phage_IME13
Klebsiella_phage_KP27	161.548	Escherichia_phage_slur07
Klebsiella_phage_KP27	155.612	Escherichia_phage_vB_EcoM_JS09
Klebsiella_phage_KP27	154.63	Enterobacteria_phage_T4
Klebsiella_phage_KP27	161.759	Shigella_phage_Shfl2
Klebsiella_phage_KP27	158.497	Enterobacteria_phage_AR1
Klebsiella_phage_KP27	149.992	Pectobacterium_bacteriophage_PM2
Klebsiella_phage_KP27	22.6202	Vibrio_phage_henriette_12B8
Klebsiella_phage_KP27	155.216	Enterobacteria_phage_QL01
Klebsiella_phage_KP27	4.38242	Staphylococcus_phage_SA1
Citrobacter_phage_IME-CF2	153.723	Enterobacteria_phage_RB51
Citrobacter_phage_IME-CF2	152.841	Escherichia_phage_slur07
Citrobacter_phage_IME-CF2	152.955	Enterobacteria_phage_JSE
Citrobacter_phage_IME-CF2	130.169	Acinetobacter_phage_133
Citrobacter_phage_IME-CF2	152.576	Enterobacteria_phage_CC31
Citrobacter_phage_IME-CF2	23.1553	Vibrio_phage_henriette_12B8
Citrobacter_phage_IME-CF2	152.841	Shigella_phage_pSs-1
Citrobacter_phage_IME-CF2	153.208	Enterobacteria_phage_IME08
Citrobacter_phage_IME-CF2	148.261	Salmonella_phage_STML-198
Citrobacter_phage_IME-CF2	120.267	Aeromonas_phage_Aeh1
Citrobacter_phage_IME-CF2	17.8759	Campylobacter_phage_CP30A
Citrobacter_phage_IME-CF2	13.3612	Sphingomonas_phage_PAU
Citrobacter_phage_IME-CF2	300	Klebsiella_phage_KP15
Citrobacter_phage_IME-CF2	148.87	Enterobacteria_phage_QL01
Citrobacter_phage_IME-CF2	152.201	Enterobacteria_phage_AR1
Citrobacter_phage_IME-CF2	300	Citrobacter_phage_Miller
Citrobacter_phage_IME-CF2	153.146	Enterobacteria_phage_RB68
Citrobacter_phage_IME-CF2	140.212	Yersinia_phage_phiR1-RT
Citrobacter_phage_IME-CF2	300	Klebsiella_phage_KP27
Citrobacter_phage_IME-CF2	27.4976	Rhizobium_phage_vB_RleM_P10VF
Citrobacter_phage_IME-CF2	149.245	Escherichia_phage_vB_EcoM_JS09
Citrobacter_phage_IME-CF2	143.798	Pectobacterium_bacteriophage_PM2
Citrobacter_phage_IME-CF2	134.499	Aeromonas_phage_Aes508
Citrobacter_phage_IME-CF2	152.765	Enterobacteria_phage_T4
Citrobacter_phage_IME-CF2	155.303	Shigella_phage_Shfl2
Citrobacter_phage_IME-CF2	145.981	Enterobacteria_phage_vB_EcoM_VR26
Citrobacter_phage_IME-CF2	151.48	Escherichia_phage_wV7
Citrobacter_phage_IME-CF2	34.5884	Sinorhizobium_phage_phiM12
Citrobacter_phage_IME-CF2	128.177	Acinetobacter_phage_ZZ1
Citrobacter_phage_IME-CF2	110.021	Aeromonas_phage_CC2
Citrobacter_phage_IME-CF2	137.182	Aeromonas_phage_Aes012
Citrobacter_phage_IME-CF2	140.596	Stenotrophomonas_phage_IME13
Citrobacter_phage_IME-CF2	300	Cronobacter_phage_vB_CsaM_GAP161
Citrobacter_phage_IME-CF2	154.309	Escherichia_phage_ECML-134
Citrobacter_phage_IME-CF2	154.309	Enterobacteria_phage_RB32
Citrobacter_phage_IME-CF2	4.60744	Staphylococcus_phage_SA1
Enterobacteria_phage_RB14	300	Shigella_phage_pSs-1
Enterobacteria_phage_RB14	153.53	Citrobacter_phage_IME-CF2
Enterobacteria_phage_RB14	120.346	Aeromonas_phage_Aeh1
Enterobacteria_phage_RB14	300	Escherichia_phage_vB_EcoM_JS09
Enterobacteria_phage_RB14	164.757	Aeromonas_phage_Aes012
Enterobacteria_phage_RB14	300	Enterobacteria_phage_vB_EcoM_VR26
Enterobacteria_phage_RB14	300	Pectobacterium_bacteriophage_PM2
Enterobacteria_phage_RB14	300	Enterobacteria_phage_IME08
Enterobacteria_phage_RB14	177.967	Enterobacteria_phage_JSE
Enterobacteria_phage_RB14	300	Escherichia_phage_wV7
Enterobacteria_phage_RB14	300	Salmonella_phage_STML-198
Enterobacteria_phage_RB14	300	Enterobacteria_phage_QL01
Enterobacteria_phage_RB14	300	Escherichia_phage_slur07
Enterobacteria_phage_RB14	300	Enterobacteria_phage_AR1
Enterobacteria_phage_RB14	296.589	Enterobacteria_phage_CC31
Enterobacteria_phage_RB14	152.994	Citrobacter_phage_Miller
Enterobacteria_phage_RB14	9.32781	Sphingomonas_phage_PAU
Enterobacteria_phage_RB14	161.379	Klebsiella_phage_KP15
Enterobacteria_phage_RB14	168.251	Stenotrophomonas_phage_IME13
Enterobacteria_phage_RB14	300	Enterobacteria_phage_RB51
Enterobacteria_phage_RB14	159.894	Klebsiella_phage_KP27
Enterobacteria_phage_RB14	175.512	Acinetobacter_phage_133
Enterobacteria_phage_RB14	251.253	Yersinia_phage_phiR1-RT
Enterobacteria_phage_RB14	300	Enterobacteria_phage_T4
Enterobacteria_phage_RB14	300	Enterobacteria_phage_RB68
Enterobacteria_phage_RB14	175.748	Acinetobacter_phage_ZZ1
Enterobacteria_phage_RB14	300	Shigella_phage_Shfl2
Enterobacteria_phage_RB14	22.5439	Rhizobium_phage_vB_RleM_P10VF
Enterobacteria_phage_RB14	157.558	Aeromonas_phage_Aes508
Enterobacteria_phage_RB14	28.2193	Sinorhizobium_phage_phiM12
Enterobacteria_phage_RB14	19.0043	Campylobacter_phage_CP30A
Enterobacteria_phage_RB14	111.881	Aeromonas_phage_CC2
Enterobacteria_phage_RB14	300	Escherichia_phage_ECML-134
Enterobacteria_phage_RB14	157.848	Cronobacter_phage_vB_CsaM_GAP161
Enterobacteria_phage_RB14	300	Enterobacteria_phage_RB32
Enterobacteria_phage_RB14	21.1054	Vibrio_phage_henriette_12B8
Escherichia_phage_e11/2	154.24	Citrobacter_phage_Miller
Escherichia_phage_e11/2	300	Shigella_phage_pSs-1
Escherichia_phage_e11/2	161.338	Cronobacter_phage_vB_CsaM_GAP161
Escherichia_phage_e11/2	300	Escherichia_phage_vB_EcoM_JS09
Escherichia_phage_e11/2	300	Enterobacteria_phage_IME08
Escherichia_phage_e11/2	162.669	Klebsiella_phage_KP15
Escherichia_phage_e11/2	166.089	Aeromonas_phage_Aes012
Escherichia_phage_e11/2	154.815	Citrobacter_phage_IME-CF2
Escherichia_phage_e11/2	158.928	Aeromonas_phage_Aes508
Escherichia_phage_e11/2	179.135	Acinetobacter_phage_133
Escherichia_phage_e11/2	111.042	Aeromonas_phage_CC2
Escherichia_phage_e11/2	20.9139	Vibrio_phage_henriette_12B8
Escherichia_phage_e11/2	300	Enterobacteria_phage_AR1
Escherichia_phage_e11/2	300	Escherichia_phage_ECML-134
Escherichia_phage_e11/2	286.585	Enterobacteria_phage_CC31
Escherichia_phage_e11/2	300	Enterobacteria_phage_vB_EcoM_VR26
Escherichia_phage_e11/2	169.85	Stenotrophomonas_phage_IME13
Escherichia_phage_e11/2	9.17616	Sphingomonas_phage_PAU
Escherichia_phage_e11/2	300	Salmonella_phage_STML-198
Escherichia_phage_e11/2	300	Enterobacteria_phage_RB32
Escherichia_phage_e11/2	300	Escherichia_phage_wV7
Escherichia_phage_e11/2	300	Escherichia_phage_slur07
Escherichia_phage_e11/2	300	Shigella_phage_Shfl2
Escherichia_phage_e11/2	252.364	Yersinia_phage_phiR1-RT
Escherichia_phage_e11/2	22.3131	Rhizobium_phage_vB_RleM_P10VF
Escherichia_phage_e11/2	298.708	Pectobacterium_bacteriophage_PM2
Escherichia_phage_e11/2	300	Enterobacteria_phage_QL01
Escherichia_phage_e11/2	29.294	Sinorhizobium_phage_phiM12
Escherichia_phage_e11/2	121.476	Aeromonas_phage_Aeh1
Escherichia_phage_e11/2	18.8217	Campylobacter_phage_CP30A
Escherichia_phage_e11/2	300	Enterobacteria_phage_RB51
Escherichia_phage_e11/2	300	Enterobacteria_phage_T4
Escherichia_phage_e11/2	300	Enterobacteria_phage_RB14
Escherichia_phage_e11/2	181.495	Enterobacteria_phage_JSE
Escherichia_phage_e11/2	163.385	Klebsiella_phage_KP27
Escherichia_phage_e11/2	174.681	Acinetobacter_phage_ZZ1
Escherichia_phage_e11/2	300	Enterobacteria_phage_RB68
Escherichia_phage_APCEc01	280.923	Enterobacteria_phage_CC31
Escherichia_phage_APCEc01	300	Enterobacteria_phage_RB14
Escherichia_phage_APCEc01	19.0783	Campylobacter_phage_CP30A
Escherichia_phage_APCEc01	153.773	Cronobacter_phage_vB_CsaM_GAP161
Escherichia_phage_APCEc01	171.479	Enterobacteria_phage_JSE
Escherichia_phage_APCEc01	165.16	Aeromonas_phage_Aes012
Escherichia_phage_APCEc01	300	Enterobacteria_phage_IME08
Escherichia_phage_APCEc01	300	Enterobacteria_phage_vB_EcoM_VR26
Escherichia_phage_APCEc01	292.47	Salmonella_phage_STML-198
Escherichia_phage_APCEc01	21.1831	Vibrio_phage_henriette_12B8
Escherichia_phage_APCEc01	300	Escherichia_phage_slur07
Escherichia_phage_APCEc01	300	Pectobacterium_bacteriophage_PM2
Escherichia_phage_APCEc01	149.435	Citrobacter_phage_IME-CF2
Escherichia_phage_APCEc01	178.543	Acinetobacter_phage_ZZ1
Escherichia_phage_APCEc01	300	Enterobacteria_phage_RB68
Escherichia_phage_APCEc01	118.709	Aeromonas_phage_Aeh1
Escherichia_phage_APCEc01	300	Escherichia_phage_ECML-134
Escherichia_phage_APCEc01	300	Enterobacteria_phage_QL01
Escherichia_phage_APCEc01	151.166	Citrobacter_phage_Miller
Escherichia_phage_APCEc01	300	Escherichia_phage_vB_EcoM_JS09
Escherichia_phage_APCEc01	300	Enterobacteria_phage_RB51
Escherichia_phage_APCEc01	300	Escherichia_phage_e11/2
Escherichia_phage_APCEc01	281.472	Yersinia_phage_phiR1-RT
Escherichia_phage_APCEc01	25.6147	Sinorhizobium_phage_phiM12
Escherichia_phage_APCEc01	152.686	Klebsiella_phage_KP15
[truncated: 63,394 more rows]
