# Supplementary material for: vConTACT: an iVirus tool to classify double-stranded DNA viruses that infect Archaea and Bacteria
Source: PeerJ. 2017 May 3;5:e3243. doi: 10.7717/peerj.3243 (PMC5419219; doi:10.7717/peerj.3243)
Supplement: Table S3 — The cluster connectivity of each viral genome within the VC it belongs to and to other VCs. Each average weight value is generated as shown in Materials and Methods. [file peerj-05-3243-s003.xlsx]

## Sheet: Table S3
Genome Name	Genus	VC	In-VC Avg. Weight	In-VC_3 Kayvirus	In-VC_3 Nit1virus	In-VC_3 Wphvirus	In-VC_3 Agatevirus	In-VC_3 Bc431virus	In-VC_3 B4virus	In-VC_3 Twortvirus	In-VC_3 Bastillevirus	In-VC_3 Silviavirus	In-VC_3 P100virus	Out-VC_95 Avg. Weight	Out-VC_208 Avg. Weight	Out-VC_149 Avg. Weight	Out-VC_42 Avg. Weight
Bacillus_phage_Bobb	Agatevirus	VC_3	107.757	64.7125	140.55	90.7	300	120.125	113.86	71.1	113.25	55.4	69.5	18.725
Bacillus_phage_Bp8p-C	Agatevirus	VC_3	101.732	60.725	130.45	83.9	300	111.175	105.12	64.9	104.85	51.8	69.4	19.975
Bacillus_phage_phiAGATE	Agatevirus	VC_3	107.221	65.225	142.4	92.2	300	115.325	113.38	71.2	111.4	55.85	69.5	20.025
Bacillus_phage_Riley	B4virus	VC_3	129.286	52.75	110.7	122.9	110.967	162.825	300	50.4	234.7	44.9	59.9	16.925	1.5
Bacillus_phage_B4	B4virus	VC_3	129.496	52.4	109.4	124.9	111.3	162.35	300	51.4	239.7	44	60.9	16.35
Bacillus_phage_BigBertha	B4virus	VC_3	130.182	52.8875	108.55	122.7	110.1	163.825	300	50.4	248.3	44.9	59.8	16.175
Bacillus_phage_Spock	B4virus	VC_3	130.025	53.5125	109.6	124	111.2	163.55	300	52.7	237.9	46.3	60.5	16.5
Bacillus_phage_Troll	B4virus	VC_3	129.386	53.05	109.85	125.1	110.367	162.4	300	52.3	236.2	44.1	60	15.925
Bacillus_phage_Bastille	Bastillevirus	VC_3	119.875	49.6125	103.7	142.7	109.733	154.3	233.08	49.8	300	44.25	59.4	16.875
Bacillus_phage_CAM003	Bastillevirus	VC_3	122.396	49.4625	105.95	144.6	109.933	153.5	245.64	48.9	300	46	62	16
Bacillus_phage_Bcp1	Bc431virus	VC_3	121.021	53.45	121.3	105.6	114.267	300	167.72	57.2	154.15	51.25	63.4	17.525
Bacillus_phage_BCP8-2	Bc431virus	VC_3	120.139	54.0875	118.45	107.2	116.567	300	160.14	60	155.15	51.05	64.3	19.075
Bacillus_phage_JBP901	Bc431virus	VC_3	120.571	55.5	121	110.7	116.333	300	159.56	58	154.2	49.85	66.4	19.65
Bacillus_phage_vB_BceM-Bc431v3	Bc431virus	VC_3	120.161	53.1125	120.8	106.2	115	300	164.54	56.4	152.1	50.5	62.5	17.5
Staphylococcus_phage_G1	Kayvirus	VC_3	133.075	300	60.3	55	64.1	54.95	53.68	205.6	50.95	195.7	71.1	18.2		7.1
Staphylococcus_phage_GH15	Kayvirus	VC_3	133.304	300	61.25	51.4	64.1333	54.5	52.96	208.4	50.05	199.85	75.2	18.2		8.5
Staphylococcus_phage_JD007	Kayvirus	VC_3	132.814	300	60.9	52.9	63.8333	53.725	53	207.5	48.9	196.25	74.9	17.65		8.4
Staphylococcus_phage_K	Kayvirus	VC_3	132.529	300	60.15	53.1	62.7667	54.55	51.78	205.7	49.15	197.5	73	17.325		9.4
Staphylococcus_phage_MCE-2014	Kayvirus	VC_3	134.643	300	62.4	54.2	65.9667	55.5	55.12	214.4	52	201.35	74.4	18.675		5.9
Staphylococcus_phage_P108	Kayvirus	VC_3	130.861	300	59	48.5	61.5667	51	50.72	202.2	47.15	192.5	73.8	17.25		4.1
Staphylococcus_phage_phiSA012	Kayvirus	VC_3	133.639	300	62	50.3	62.9667	55.175	53.36	213.4	49	201.85	76.1	18.15		4.5
Staphylococcus_phage_S25-3	Kayvirus	VC_3	132.382	300	62.2	50.4	63.1	52.9	52.74	208.1	49.1	192.4	76.2	18.175		1.9
Bacillus_phage_Grass	Nit1virus	VC_3	100.532	59.0375	300	90	143.533	125.375	114.7	62.8	108.3	51.25	65.1	18.975
Bacillus_phage_phiNIT1	Nit1virus	VC_3	97.0179	63.0125	300	84.8	132.067	115.4	104.54	66.1	101.35	55.95	66.4	20.725			1.8
Listeria_phage_A511	P100virus	VC_3	66.4964	74.3375	65.75	57.4	69.4667	64.15	60.22	67.2	60.7	61.8		22.05
Staphylococcus_phage_SA11	Silviavirus	VC_3	111.029	203.312	57.7	47.1	58.2	55.025	48.82	217.8	48.5	300	66.2	18.8		14.1
Staphylococcus_phage_vB_SauM_Remus	Silviavirus	VC_3	101.875	191.037	49.5	41.2	50.5	46.3	40.86	202.1	41.75	300	57.4	13.7		11.4
Staphylococcus_phage_Twort	Twortvirus	VC_3	111.7	208.162	64.45	51.6	69.0667	57.9	51.44		49.35	209.95	67.2	19.975		10.6
Bacillus_phage_W.Ph.	Wphvirus	VC_3	85.4036	51.975	87.4		88.9333	107.425	123.92	51.6	143.65	44.15	57.4	16.5
Genome Name	Genus	VC	In-VC Avg. Weight	In-VC_58 G4microvirus	In-VC_58 Phix174microvirus	In-VC_58 Alpha3microvirus
Enterobacteria_phage_phiK	Alpha3microvirus	VC_58	24.35	22.9	18.4	33.2
Enterobacteria_phage_St-1	Alpha3microvirus	VC_58	23.975	22.4	17.9	33.2
Enterobacteria_phage_G4_sensu_lato	G4microvirus	VC_58	26.15	32.2	27.1	22.65
Enterobacteria_phage_ID2_Moscow/ID/2001	G4microvirus	VC_58	26.15	32.2	27.1	22.65
Enterobacteria_phage_phiX174_sensu_lato	Phix174microvirus	VC_58	22.625	27.1		18.15
Genome Name	Genus	VC	In-VC Avg. Weight	In-VC_51 Alphafusellovirus	In-VC_51 Betafusellovirus
Sulfolobus_spindle-shaped_virus_1	Alphafusellovirus	VC_51	39.4333	42.15	34
Sulfolobus_spindle-shaped_virus_2	Alphafusellovirus	VC_51	51.25	56.575	40.6
Sulfolobus_spindle-shaped_virus_4	Alphafusellovirus	VC_51	59.25	67.625	42.5
Sulfolobus_spindle-shaped_virus_5	Alphafusellovirus	VC_51	58.6167	66.675	42.5
Sulfolobus_spindle-shaped_virus_7	Alphafusellovirus	VC_51	45.6667	47.375	42.25
Acidianus_spindle-shaped_virus_1	Betafusellovirus	VC_51	35.4	33.84	43.2
Sulfolobus_spindle-shaped_virus_6	Betafusellovirus	VC_51	46.2833	46.9	43.2
Genome Name	Genus	VC	In-VC Avg. Weight	In-VC_129 Alphapleolipovirus
Halorubrum_pleomorphic_virus_1	Alphapleolipovirus	VC_129	9.6	9.6
Halorubrum_pleomorphic_virus_2	Alphapleolipovirus	VC_129	19.2	19.2
Halorubrum_pleomorphic_virus_6	Alphapleolipovirus	VC_129	19.7	19.7
Genome Name	Genus	VC	In-VC Avg. Weight	In-VC_169 Alphasphaerolipovirus
Haloarcula_hispanica_icosahedral_virus_2	Alphasphaerolipovirus	VC_169	85.05	85.05
Haloarcula_hispanica_virus_PH1	Alphasphaerolipovirus	VC_169	99.05	99.05
Haloarcula_hispanica_virus_SH1	Alphasphaerolipovirus	VC_169	101.5	101.5
Genome Name	Genus	VC	In-VC Avg. Weight	In-VC_207 Alphaturrivirus
Sulfolobus_turreted_icosahedral_virus_1	Alphaturrivirus	VC_207	65.8	65.8
Sulfolobus_turreted_icosahedral_virus_2	Alphaturrivirus	VC_207	65.8	65.8
Genome Name	Genus	VC	In-VC Avg. Weight	In-VC_75 Andromedavirus
Bacillus_phage_Andromeda	Andromedavirus	VC_75	200.333	200.333
Bacillus_phage_Blastoid	Andromedavirus	VC_75	191.283	191.283
Bacillus_phage_Curly	Andromedavirus	VC_75	197.367	197.367
Bacillus_phage_Eoghan	Andromedavirus	VC_75	191.833	191.833
Bacillus_phage_Finn	Andromedavirus	VC_75	195.45	195.45
Bacillus_phage_Glittering	Andromedavirus	VC_75	200.35	200.35
Bacillus_phage_Riggi	Andromedavirus	VC_75	199.283	199.283
Genome Name	Genus	VC	In-VC Avg. Weight	In-VC_125 Ap22virus	Out-VC_71 Avg. Weight
Acinetobacter_bacteriophage_AP22	Ap22virus	VC_125	136.1	136.1	6.16
Acinetobacter_phage_YMC-13-01-C62	Ap22virus	VC_125	136.1	136.1
Genome Name	Genus	VC	In-VC Avg. Weight	In-VC_80 Barnyardvirus	Out-VC_81 Avg. Weight
Mycobacterium_phage_Barnyard	Barnyardvirus	VC_80	86.6667	86.6667	20.5
Mycobacterium_phage_Konstantine	Barnyardvirus	VC_80	121.4	121.4	33.1
Mycobacterium_phage_Patience	Barnyardvirus	VC_80	85.7667	85.7667	24.9
Mycobacterium_phage_Predator	Barnyardvirus	VC_80	122.9	122.9	24
Genome Name	Genus	VC	In-VC Avg. Weight	In-VC_63 Bcep22virus	In-VC_63 F116virus
Burkholderia_phage_Bcep22	Bcep22virus	VC_63	101.475	133.133	6.5
Burkholderia_phage_BcepIL02	Bcep22virus	VC_63	108.45	142.4	6.6
Burkholderia_phage_BcepMigl	Bcep22virus	VC_63	105.725	138.767	6.6
Burkholderia_phage_DC1	Bcep22virus	VC_63	103.6	135.9	6.7
Pseudomonas_phage_F116	F116virus	VC_63	6.6	6.6
Genome Name	Genus	VC	In-VC Avg. Weight	In-VC_71 Bcep78virus	Out-VC_125 Avg. Weight
Burkholderia_phage_Bcep1	Bcep78virus	VC_71	151.1	151.1	5.9
Burkholderia_phage_Bcep43	Bcep78virus	VC_71	149.925	149.925	6.3
Burkholderia_phage_Bcep781	Bcep78virus	VC_71	150.5	150.5	6.2
Burkholderia_phage_BcepNY3	Bcep78virus	VC_71	150.4	150.4	6
Xanthomonas_phage_OP2	Bcep78virus	VC_71	75.225	75.225	6.4
Genome Name	Genus	VC	In-VC Avg. Weight	In-VC_188 Bcepmuvirus	Out-VC_10 Avg. Weight	Out-VC_15 Avg. Weight	Out-VC_91 Avg. Weight	Out-VC_99 Avg. Weight
Burkholderia_phage_BcepMu	Bcepmuvirus	VC_188	134.7	134.7	3.02308	2.2	2.48	4.3
Burkholderia_phage_phiE255	Bcepmuvirus	VC_188	134.7	134.7	3.10769	2.2	2.38	4.2
Genome Name	Genus	VC	In-VC Avg. Weight	In-VC_33 Chlamydiamicrovirus	In-VC_33 Spiromicrovirus	In-VC_33 Bdellomicrovirus
Bdellovibrio_phage_phiMH2K	Bdellomicrovirus	VC_33	7.06667	9.15	2.9
Chlamydia_phage_2	Chlamydiamicrovirus	VC_33	7.43333	8.1	3.4	10.8
Chlamydia_pneumoniae_phage_CPAR39	Chlamydiamicrovirus	VC_33	6.46667	8.1	3.8	7.5
Spiroplasma_phage_4	Spiromicrovirus	VC_33	3.36667	3.6		2.9
Genome Name	Genus	VC	In-VC Avg. Weight	In-VC_77 Betalipothrixvirus	In-VC_77 Deltalipothrixvirus	Out-VC_74 Avg. Weight
Sulfolobus_islandicus_filamentous_virus	Betalipothrixvirus	VC_77	72.7167	83.86	17	2.7
Acidianus_filamentous_virus_3	Betalipothrixvirus	VC_77	117.817	139.32	10.3
Acidianus_filamentous_virus_6	Betalipothrixvirus	VC_77	116.583	137.82	10.4
Acidianus_filamentous_virus_7	Betalipothrixvirus	VC_77	90.9167	101.6	37.5
Acidianus_filamentous_virus_8	Betalipothrixvirus	VC_77	113.7	134.28	10.8
Acidianus_filamentous_virus_9	Betalipothrixvirus	VC_77	96.3333	114.04	7.8
Acidianus_filamentous_virus_2	Deltalipothrixvirus	VC_77	15.6333	15.6333
Genome Name	Genus	VC	In-VC Avg. Weight	In-VC_203 Betapleolipovirus
Halogeometricum_pleomorphic_virus_1	Betapleolipovirus	VC_203	1.8	1.8
Halorubrum_pleomorphic_virus_3	Betapleolipovirus	VC_203	1.8	1.8
Genome Name	Genus	VC	In-VC Avg. Weight	In-VC_25 Che9cvirus	In-VC_25 Charlievirus	In-VC_25 Bignuzvirus	Out-VC_16 Avg. Weight	Out-VC_52 Avg. Weight	Out-VC_7 Avg. Weight	Out-VC_112 Avg. Weight	Out-VC_21 Avg. Weight
Mycobacterium_phage_BigNuz	Bignuzvirus	VC_25	45.225	51.5	26.4		3.14	4.06667	6.35333
Mycobacterium_phage_Charlie	Charlievirus	VC_25	39.6	44		26.4	2.74	4.86667	19.5312	10.5	2.16667
Mycobacterium_phage_Babsiella	Che9cvirus	VC_25	81.25	109.25	47.7	58.8		6.9	19.0312	15.65
Mycobacterium_phage_Brujita	Che9cvirus	VC_25	73.65	106.8	42.9	38.1	2.82	7.66667	17.0125	22.3
Mycobacterium_phage_Che9c	Che9cvirus	VC_25	61.325	73.15	41.4	57.6		4.46667	14.8562	9.45
Genome Name	Genus	VC	In-VC Avg. Weight	In-VC_2 Phietavirus	In-VC_2 Biseptimavirus	In-VC_2 Triavirus	Out-VC_11 Avg. Weight	Out-VC_29 Avg. Weight	Out-VC_38 Avg. Weight	Out-VC_46 Avg. Weight	Out-VC_96 Avg. Weight	Out-VC_144 Avg. Weight	Out-VC_154 Avg. Weight	Out-VC_149 Avg. Weight	Out-VC_157 Avg. Weight	Out-VC_56 Avg. Weight
Staphylococcus_phage_13	Biseptimavirus	VC_2	23.6281	20.5586	65.2	29.5	2.65	4.6	10.5
Staphylococcus_phage_77	Biseptimavirus	VC_2	37.2455	35.68	57.05	44.6		1.7	38.875	5.6	4.9
Staphylococcus_phage_Pvl108	Biseptimavirus	VC_2	20.9937	17.4483	71.45	22.9		4.1	17.35	1.9
Staphylococcus_phage_11	Phietavirus	VC_2	59.2939	63.6862	21.5333	45.2	4.64		10.75			1.95	2.25
Staphylococcus_phage_187	Phietavirus	VC_2	49.5485	52.1517	29.0667	35.5	3.24		11.35			8.33333	1.35
Staphylococcus_phage_53	Phietavirus	VC_2	74.3636	79.5793	35.9	38.5	2.14		28.275			4.4	2.45
Staphylococcus_phage_69	Phietavirus	VC_2	70.0333	74.9414	33.7	36.7	3.92		16.45			1.35		1.1
Staphylococcus_phage_80alpha	Phietavirus	VC_2	72.4	77.5241	34.9667	36.1	2.16		25.875			4.46667	2.5
Staphylococcus_phage_85	Phietavirus	VC_2	67.7152	73.331	24.7333	33.8	3.42		17.475			5.16667	2.55	2.6	1.6
Staphylococcus_phage_Ipla88	Phietavirus	VC_2	62.0909	67.0621	19.2667	46.4	4.32		14.25			1.65	5.05			1.05
Staphylococcus_phage_phiETA2	Phietavirus	VC_2	72.4212	77.669	33.6	36.7	1.88		21.9			3.93333
Staphylococcus_phage_phiMR25	Phietavirus	VC_2	73.8091	79.7897	27.5667	39.1	3.5		20.6			2.25	1.5	2.7
Staphylococcus_phage_phiNM	Phietavirus	VC_2	69.6242	75.2862	29.8333	24.8	2.08		22.4			3.45
Staphylococcus_phage_phinm2	Phietavirus	VC_2	72.3303	77.969	30.4333	34.5	4.04		20.3			4.73333	3.75	2.8
Staphylococcus_phage_Sap26	Phietavirus	VC_2	64.1727	68.9828	25.6333	40.3	3.72		10.55			1.55
Staphylococcus_phage_phiETA3	Phietavirus	VC_2	65.3576	70.5241	24.9333	36.8			16.525			1.4
Staphylococcus_phage_phiMR11	Phietavirus	VC_2	69.697	75.0414	24.4333	50.5			17.825			1.4	1.7	1.2
Staphylococcus_phage_88	Phietavirus	VC_2	76.4879	82.6828	29.7333	37.1			18.6					2.8
Staphylococcus_phage_92	Phietavirus	VC_2	73.7273	78.9552	30.7333	51.1			17.45					1.3
Staphylococcus_phage_Ipla5	Phietavirus	VC_2	48.2909	53.1207	7.86667	29.5			7.125					2.8
Staphylococcus_phage_Ipla7	Phietavirus	VC_2	41.9219	45.469	6.85	9.2			6.95					3.2
Staphylococcus_phage_X2	Phietavirus	VC_2	65.3242	70.7448	18.5333	48.5			15.225				1.3	4
Staphylococcus_phage_CNPH82	Phietavirus	VC_2	50.2576	55.3862	11.6	17.5			9.3				2.75
Staphylococcus_phage_PH15	Phietavirus	VC_2	48.1576	53.3172	7.8	19.6			8.575				1.6
Staphylococcus_phage_29	Phietavirus	VC_2	69.597	74.6966	27.6	47.7			14.3
Staphylococcus_phage_37	Phietavirus	VC_2	39.5182	43.669	9.06667	10.5			4.35
Staphylococcus_phage_52A	Phietavirus	VC_2	66.4606	71.8138	25.0333	35.5			17.85
Staphylococcus_phage_55	Phietavirus	VC_2	67.5333	72.8793	25.7	38			14.7
Staphylococcus_phage_71	Phietavirus	VC_2	69.6152	75.1655	25.9667	39.6			22.1
Staphylococcus_phage_96	Phietavirus	VC_2	65.197	69.9724	24.4	49.1			25.15
Staphylococcus_phage_EW	Phietavirus	VC_2	43.0031	46.3897	7.15	16.5			4.9
Staphylococcus_phage_phiETA	Phietavirus	VC_2	69.5182	74.4034	33.9667	34.5			21.55
Staphylococcus_phage_phinm4	Phietavirus	VC_2	69.4182	73.8034	41.2667	26.7			26.425
Staphylococcus_phage_42E	Triavirus	VC_2	34.6212	34.85	32.3333				77.625
Genome Name	Genus	VC	In-VC Avg. Weight	In-VC_55 Epsilon15virus	In-VC_55 Bpp1virus	Out-VC_104 Avg. Weight	Out-VC_24 Avg. Weight	Out-VC_45 Avg. Weight
Burkholderia_phage_BcepC6B	Bpp1virus	VC_55	15.65	15.65		2.83333	2.70909	2.3
Escherichia_phage_phiV10	Epsilon15virus	VC_55	56.4	98.6	14.2
Salmonella_phage_epsilon15	Epsilon15virus	VC_55	57.85	98.6	17.1			17.1
Genome Name	Genus	VC	In-VC Avg. Weight	In-VC_35 Bronvirus	Out-VC_16 Avg. Weight	Out-VC_21 Avg. Weight	Out-VC_52 Avg. Weight
Mycobacterium_phage_bron	Bronvirus	VC_35	220	220	16.16	5.52	3.36667
Mycobacterium_phage_Faith1	Bronvirus	VC_35	220	220	12.3	6.68	6.6
Genome Name	Genus	VC	In-VC Avg. Weight	In-VC_126 C2virus	Out-VC_30 Avg. Weight
Lactococcus_phage_bIL67	C2virus	VC_126	110.9	110.9	2.99
Lactococcus_phage_c2	C2virus	VC_126	110.9	110.9	2.86
Genome Name	Genus	VC	In-VC Avg. Weight	In-VC_84 C5virus
Lactobacillus_phage_c5	C5virus	VC_84	131.3	131.3
Lactobacillus_phage_LLKu	C5virus	VC_84	131.3	131.3
Genome Name	Genus	VC	In-VC Avg. Weight	In-VC_170 Cba181virus
Cellulophaga_phage_phi12:1	Cba181virus	VC_170	147.2	147.2
Cellulophaga_phage_phi17:1	Cba181virus	VC_170	155.7	155.7
Cellulophaga_phage_phi18:1	Cba181virus	VC_170	157.8	157.8
Genome Name	Genus	VC	In-VC Avg. Weight	In-VC_161 Cba41virus
Cellulophaga_phage_phi17:2	Cba41virus	VC_161	300	300
Cellulophaga_phage_phi4:1	Cba41virus	VC_161	300	300
Genome Name	Genus	VC	In-VC Avg. Weight	In-VC_1 Rb69virus	In-VC_1 Tg1virus	In-VC_1 T4virus	In-VC_1 Sp18virus	In-VC_1 Js98virus	In-VC_1 Rb49virus	In-VC_1 Schizot4virus	In-VC_1 S16virus	In-VC_1 Cp8virus	In-VC_1 Secunda5virus	In-VC_1 Cc31virus	Out-VC_18 Avg. Weight	Out-VC_32 Avg. Weight	Out-VC_87 Avg. Weight	Out-VC_17 Avg. Weight	Out-VC_40 Avg. Weight
Enterobacteria_phage_CC31	Cc31virus	VC_1	239.521	219.275	271	292.792	278.8	271.54	167.6	90.1667	300	18.45	174.9		26.9364	1	11.4667
Campylobacter_phage_CPX	Cp8virus	VC_1	21.4	21.5667	23.6	21.4917	20.58	21.56	21.35	20.6333	21.15	300	20.8	21.3	14.7182		34.3
Campylobacter_phage_NCTC12673	Cp8virus	VC_1	15.68	15.8667	17.7	15.7833	14.96	15.82	15.65	15.2	15.45	300	14.8	15.6	10.8182		35.6
Enterobacteria_phage_Bp7	Js98virus	VC_1	247.358	245.25	270.9	300	300	300	161.9	84.5667	268.35	17.45	170.4	257.3	25.5727	1.6	11.0667
Enterobacteria_phage_IME08	Js98virus	VC_1	250.382	244.75	273.1	300	300	300	172.2	93.3333	287.25	19.4	182.8	268.8	26.5091	1.8	12.3
Enterobacteria_phage_JS10	Js98virus	VC_1	250.829	245.2	278.45	300	300	300	171.75	91.5	291.15	18.95	180.3	275.3	25.0455	1.6	11.9
Enterobacteria_phage_JS98	Js98virus	VC_1	251.129	247.275	279.45	300	300	300	170.4	89.5333	293.6	18.9	180.1	280.4	24.6	1.6	11.8667
Enterobacteria_phage_vB_EcoM_VR5	Js98virus	VC_1	250.226	246.475	275	300	300	300	167	87.0667	292.55	18.75	179	275.9	23.7909		11.7333
Enterobacteria_phage_Phi1	Rb49virus	VC_1	155.521	130.925	162.4	177.108	165.82	169.42	300	84.6333	176.4	18.55	148.1	167.9	22.7455	1.1	11.5667	1.7
Enterobacteria_phage_RB49	Rb49virus	VC_1	153.863	129.825	159.55	174.725	164.76	167.88	300	82.5	174.6	18.45	147.6	167.3	22.7545	1.82857	11.4667	2.2
Enterobacteria_phage_HX01	Rb69virus	VC_1	84.2031	117.6	28.1	110.325	80.08	83.16	5.55		49.2			35.9
Enterobacteria_phage_RB69	Rb69virus	VC_1	251.408	237.567	278.4	300	300	300	171.15	90.4	288.25	18.65	176.1	280.6	21.3909		11.6333
Escherichia_phage_vB_EcoM_JS09	Rb69virus	VC_1	252.368	243.333	282.5	300	300	300	171.15	90.4	292.4	18.65	176.1	283.3	21.3909		11.6333
Shigella_phage_Shf125875	Rb69virus	VC_1	251.934	236.7	281.85	300	300	300	173.65	93.0667	290.45	18.85	177.3	277.3	22.0364		11.8333
Salmonella_phage_S16	S16virus	VC_1	244.297	227.725	251.8	299.475	284.86	284.56	176.9	89.9	300	18.85	166.8	300	22.4182	1.58333	12.2333
Salmonella_phage_STML-198	S16virus	VC_1	247.268	232.425	265.55	299.433	295.26	288.6	174.1	89.9333	300	17.75	169.4	300	23.0091	1.68571	10.8667
Vibrio_phage_KVP40	Schizot4virus	VC_1	98.3027	91.7	90.5	93.725	86.82	89.56	83.9	300	91.5	18.2	95.5	91.8	19.0545	1.55	10.0333		1.6
Vibrio_phage_nt-1	Schizot4virus	VC_1	94.0243	87.6667	84.8	88.6583	81.92	85.66	80.15	300	85.75	17.6	91.5	86	19.6545	1.8	9.53333		1.3
Vibrio_phage_ValKK3	Schizot4virus	VC_1	99.8892	94.5	89.7	95.4417	88.44	92.38	86.65	300	92.5	17.95	96.7	92.7	19.2545	1.45	9.83333		1.5
Stenotrophomonas_phage_IME13	Secunda5virus	VC_1	156.681	176.5	170.6	170.233	173	178.52	147.85	94.5667	168.1	17.8		174.9	24.4364	1.4	12.8333
Enterobacteria_phage_vB_EcoM_VR20	Sp18virus	VC_1	249.655	244.125	256.85	300	300	300	170.7	89.2	295.45	18.2	176.2	284.2	23.6818	1.2	11.2333
Enterobacteria_phage_vB_EcoM_VR25	Sp18virus	VC_1	249.053	245.35	256.1	300	300	300	164.8	86.5333	294.25	17.95	174.9	281.9	22.8364		11.0333
Enterobacteria_phage_vB_EcoM_VR26	Sp18virus	VC_1	248.637	244.725	258	300	300	300	164.05	86.2	289.1	18	175.2	277.2	24.7	1.3	11.5333
Enterobacteria_phage_vB_EcoM-VR7	Sp18virus	VC_1	247.637	246.05	253.5	300	300	300	160.3	82.5	285.65	17.95	169.8	273.9	22.8364		11.4333
Shigella_phage_SP18	Sp18virus	VC_1	247.908	244.85	252.2	300	300	300	166.6	84.2	285.85	16.75	168.9	276.8	23.2		10.0667
Enterobacteria_phage_AR1	T4virus	VC_1	250.789	252.2	249.2	300	300	300	175.15	91.6667	300	18.35	169.5	291.3	23.7455	1.4	11.4333
Enterobacteria_phage_ime09	T4virus	VC_1	251.361	252.5	251.8	300	300	300	174.55	93.5	300	18.85	171.9	298.9	24.5	1.6	11.8333
Enterobacteria_phage_RB14	T4virus	VC_1	251.35	253.15	252.6	300	300	300	176.7	92.6333	300	18.65	168.3	296.6	24.0636	1.5	11.6333
Enterobacteria_phage_RB3	T4virus	VC_1	250.892	252.375	248.9	300	300	300	176.9	92.8	300	18.65	168.4	288.7	24.9364	1.23333	12.0667
Enterobacteria_phage_T4	T4virus	VC_1	249.55	248.475	246.1	300	300	300	171.25	93.9	293.45	18.45	170	278.8	25.2818	1.13333	11.5333
Enterobacteria_phage_vB_EcoM_ACG-C40	T4virus	VC_1	251.105	252.975	251.5	300	300	300	177.25	90.9667	300	18.35	169.3	293.7	24.5364	1.4	11.3667
Escherichia_phage_e11/2	T4virus	VC_1	251.126	253.025	253.7	300	300	300	177.9	91.3667	300	18.45	169.9	286.6	24.6818	1.2	11.4667
Escherichia_phage_ECML-134	T4virus	VC_1	251.513	253.25	252.5	300	300	300	177.6	92.6	300	18.75	169	300	24.2545	1.5	12.1667
Shigella_phage_pSs-1	T4virus	VC_1	251.682	253.35	253.75	300	300	300	177.35	93.8	300	18.9	172.3	296.8	24.6	1.6	12.3
Shigella_phage_Shfl2	T4virus	VC_1	251.408	253.375	250.1	300	300	300	178.7	93.3333	300	18.95	170	294.5	24.4818	1.6	11.9
Yersinia_phage_phiD1	T4virus	VC_1	250.711	253.075	245.1	300	300	300	172.6	92.2333	300	18.55	172.8	292.7	24.0818	1.4	11.5333
Yersinia_phage_PST	T4virus	VC_1	251.489	253.225	256.15	300	300	300	175.05	92.5	300	18.75	171.4	294.9	25.0364	1.23333	12.1333
Yersinia_phage_phiR1-RT	Tg1virus	VC_1	223.079	219.75	300	250.725	257.16	276.76	163.25	90.1333	264.7	20.65	175.7	276.4	25.0636		13.3333
Yersinia_phage_vB_YenM_TG1	Tg1virus	VC_1	220.237	215.675	300	251.175	253.5	274	158.7	86.5333	252.65	20.65	165.5	265.6	25.4727		13.3333
Genome Name	Genus	VC	In-VC Avg. Weight	In-VC_56 Cd119virus	Out-VC_2 Avg. Weight
Clostridium_phage_phiC2	Cd119virus	VC_56	53.65	53.65	1.8
Clostridium_phage_phiCD119	Cd119virus	VC_56	36.7	36.7	1.53333
Clostridium_phage_phiCD27	Cd119virus	VC_56	45.25	45.25	1.3
Genome Name	Genus	VC	In-VC Avg. Weight	In-VC_123 Cecivirus	Out-VC_154 Avg. Weight	Out-VC_29 Avg. Weight
Bacillus_phage_250	Cecivirus	VC_123	104.1	104.1	2.15	8.8
Bacillus_phage_IEBH	Cecivirus	VC_123	104.1	104.1	1.15	9.3
Genome Name	Genus	VC	In-VC Avg. Weight	In-VC_7 Che8virus	Out-VC_0 Avg. Weight	Out-VC_112 Avg. Weight	Out-VC_16 Avg. Weight	Out-VC_25 Avg. Weight	Out-VC_52 Avg. Weight	Out-VC_141 Avg. Weight	Out-VC_21 Avg. Weight	Out-VC_59 Avg. Weight
Mycobacterium_phage_Ardmore	Che8virus	VC_7	162.153	162.153	4.00667	11.15	4.88	14.98	12.5333
Mycobacterium_phage_Avani	Che8virus	VC_7	85.1267	85.1267	4.56	8.25	1.86667	2.85	5.86667	1.7	1.03333	2.05
Mycobacterium_phage_Boomer	Che8virus	VC_7	147.067	147.067	2.7	10.1	2.2	17.42	12.7333		5.42
Mycobacterium_phage_Che8	Che8virus	VC_7	148.773	148.773	3.20714	13.35	4.82	17.52	13.8333
Mycobacterium_phage_Che9d	Che8virus	VC_7	69.1267	69.1267	3.49375	7.25	1.54	3.14	4.23333	1.6	1.1
Mycobacterium_phage_DeadP	Che8virus	VC_7	157.86	157.86	3.25	10.05	1.68	15.42	15.4333
Mycobacterium_phage_Drago	Che8virus	VC_7	157.013	157.013	2.74286	10.2	3.92	15.16	13.3667		5.84
Mycobacterium_phage_Fruitloop	Che8virus	VC_7	150.4	150.4	6.41875	10.25	5.86	17.64	16.4667
Mycobacterium_phage_GUmbie	Che8virus	VC_7	158.453	158.453	3.87333	11.05	4.84	14.76	12.2333
Mycobacterium_phage_Llij	Che8virus	VC_7	168.38	168.38	2.84286	8.6	4.04	15.36	11.9667
Mycobacterium_phage_Pacc40	Che8virus	VC_7	155.867	155.867	3.96667	11.25	5.56	16.94	11.9667
Mycobacterium_phage_PMC	Che8virus	VC_7	177.433	177.433	2.97857	8.4	3.88	17.98	12.8
Mycobacterium_phage_SG4	Che8virus	VC_7	157.54	157.54	3.38	10.1	6.06	19.18	13.8
Mycobacterium_phage_Taj	Che8virus	VC_7	163.927	163.927	3.4	9.85	2.46	20.2	13.6333
Mycobacterium_phage_Tweety	Che8virus	VC_7	162.193	162.193	2.6	11.65	3.1	15.24	16.4
Mycobacterium_phage_Wee	Che8virus	VC_7	163.513	163.513	3.34286	11.75	2.5	21.22	13.2667
Genome Name	Genus	VC	In-VC Avg. Weight	In-VC_31 Chivirus	Out-VC_15 Avg. Weight
Salmonella_phage_Chi	Chivirus	VC_31	196.825	196.825	1.53333
Salmonella_phage_FSLSP030	Chivirus	VC_31	186.6	186.6	1.65
Salmonella_phage_FSLSP088	Chivirus	VC_31	183.85	183.85	1.66667
Salmonella_phage_iEPS5	Chivirus	VC_31	193.7	193.7	1.61667
Salmonella_phage_SPN19	Chivirus	VC_31	189.675	189.675	1.63333
Genome Name	Genus	VC	In-VC Avg. Weight	In-VC_16 Cjw1virus	Out-VC_0 Avg. Weight	Out-VC_25 Avg. Weight	Out-VC_35 Avg. Weight	Out-VC_52 Avg. Weight	Out-VC_7 Avg. Weight
Mycobacterium_phage_244	Cjw1virus	VC_16	300	300	1.8	2.5	15.35	32.1	3.42143
Mycobacterium_phage_Kostya	Cjw1virus	VC_16	299.175	299.175	1.73333	2.46667	14.4	29	4.42
Mycobacterium_phage_Porky	Cjw1virus	VC_16	299.175	299.175	1.8	2.9	13.3	30.4667	3.14667
Mycobacterium_phage_Cjw1	Cjw1virus	VC_16	300	300		3.03333	14.45	25.7333	3.18
Mycobacterium_phage_Toto	Cjw1virus	VC_16	300	300		3.6	13.65	31.1333	4.7875
Genome Name	Genus	VC	In-VC Avg. Weight	In-VC_112 Corndogvirus	Out-VC_0 Avg. Weight	Out-VC_25 Avg. Weight	Out-VC_52 Avg. Weight	Out-VC_7 Avg. Weight
Mycobacterium_phage_Corndog	Corndogvirus	VC_112	300	300	2.775	14.625	11.0333	10.5
Mycobacterium_phage_Firecracker	Corndogvirus	VC_112	300	300	3.2	14.325	11.2333	9.90625
Genome Name	Genus	VC	In-VC Avg. Weight	In-VC_87 Cp220virus	Out-VC_1 Avg. Weight	Out-VC_18 Avg. Weight
Campylobacter_phage_CP21	Cp220virus	VC_87	234.533	234.533	12.2842	7.79091
Campylobacter_phage_CP220	Cp220virus	VC_87	231.967	231.967	14.3105	9.76364
Campylobacter_phage_CPt10	Cp220virus	VC_87	235.867	235.867	13.2974	8.28182
Campylobacter_phage_IBB35	Cp220virus	VC_87	102.367	102.367	7.55
Genome Name	Genus	VC	In-VC Avg. Weight	In-VC_95 Cp51virus	In-VC_95 Spo1virus	Out-VC_3 Avg. Weight
Bacillus_phage_CP-51	Cp51virus	VC_95	229	300	87	16.3483
Bacillus_phage_JL	Cp51virus	VC_95	229.867	300	89.6	16.1931
Bacillus_phage_Shanette	Cp51virus	VC_95	230.467	300	91.4	16.2
Bacillus_phage_SPO1	Spo1virus	VC_95	89.3333	89.3333		23.2
Genome Name	Genus	VC	In-VC Avg. Weight	In-VC_17 V5virus	In-VC_17 Se1virus	In-VC_17 Cr3virus	Out-VC_20 Avg. Weight	Out-VC_32 Avg. Weight	Out-VC_40 Avg. Weight	Out-VC_1 Avg. Weight
Cronobacter_phage_CR3	Cr3virus	VC_17	127.333	64.5	96	300	3.3875	2.05
Cronobacter_phage_CR8	Cr3virus	VC_17	126.978	64.125	95.4333	300	3.175	2.8
Cronobacter_phage_CR9	Cr3virus	VC_17	127.478	64.425	96.5333	300	2.975	1.85
Cronobacter_phage_vB_CsaM_GAP31	Se1virus	VC_17	151.156	117.65	300	96.6	7.6	3.875
Enterobacteria_phage_4MG	Se1virus	VC_17	150.267	117.35	300	94.3333	7.55	4.4875
Salmonella_phage_SSE-121	Se1virus	VC_17	156.211	128.7	300	97.0333	7.9375	9.4125	1.7
Enterobacteria_phage_vB_EcoM-FV3	V5virus	VC_17	162.622	300	123.367	64.5	4.6875	5.6875		2.75
Escherichia_phage_vB_EcoM_FFH2	V5virus	VC_17	161.011	300	120.367	62.6667	4.6875	4.6375		1.15
Escherichia_phage_2_JES-2013	V5virus	VC_17	162.333	300	121.433	65.5667	4.625	4.7625
Escherichia_phage_rv5	V5virus	VC_17	161.478	300	119.767	64.6667	4.35	4.3375
Genome Name	Genus	VC	In-VC Avg. Weight	In-VC_10 P2virus	In-VC_10 Cvm10virus	Out-VC_188 Avg. Weight	Out-VC_91 Avg. Weight	Out-VC_82 Avg. Weight
Escherichia_phage_vB_EcoM_ECO1230-10	Cvm10virus	VC_10	25.45	14.5545	145.3	2.15	14.9
Escherichia_phage_vB_EcoM-ep3	Cvm10virus	VC_10	25.2167	14.3	145.3	2.35	15.4
Burkholderia_phage_phi52237	P2virus	VC_10	46.7917	53.81	11.7	4.65	10.48	2.5
Burkholderia_phage_phiE12-2	P2virus	VC_10	39.4417	45.03	11.5	2.35	10.24	4.26
Burkholderia_phage_phiE202	P2virus	VC_10	48.4083	55.76	11.65	4.65	10.4	2.45
Enterobacteria_phage_186	P2virus	VC_10	49.35	56.1	15.6	2.55	15	8.32
Enterobacteria_phage_P2	P2virus	VC_10	54.3667	62.05	15.95	2.7	13.32	6.58
Enterobacteria_phage_WPhi	P2virus	VC_10	54.7583	62.54	15.85	2.65	13.2	7.02
Mannheimia_phage_phiMHaA1	P2virus	VC_10	35.4167	39.7	14	2.45	11.2	4.78
Pseudomonas_phage_phiCTX	P2virus	VC_10	41.7583	47.27	14.2	3.55	11.98	3.625
Ralstonia_phage_RSA1	P2virus	VC_10	41.1167	46.57	13.85	4.45	10.6	2.76667
Salmonella_phage_Fels-2	P2virus	VC_10	44.9667	50.34	18.1	2.5	12.34	7.76
Yersinia_phage_L-413C	P2virus	VC_10	53.625	61.09	16.3	2.85	13.66	6.8
Genome Name	Genus	VC	In-VC Avg. Weight	In-VC_15 D3112virus	Out-VC_31 Avg. Weight	Out-VC_39 Avg. Weight	Out-VC_99 Avg. Weight	Out-VC_188 Avg. Weight
Pseudomonas_phage_D3112	D3112virus	VC_15	136.04	136.04	1.5	1.25	6.4
Pseudomonas_phage_DMS3	D3112virus	VC_15	130.52	130.52	1.62	1.4	6.6
Pseudomonas_phage_LPB1	D3112virus	VC_15	127.4	127.4	1.56	1.3	4.3	2.2
Pseudomonas_phage_MP22	D3112virus	VC_15	133.1	133.1	1.68	1.4	6.6
Pseudomonas_phage_MP29	D3112virus	VC_15	135.86	135.86	1.68	1.4	6.6
Pseudomonas_phage_MP38	D3112virus	VC_15	135.84	135.84	1.68	1.4	6.6
Genome Name	Genus	VC	In-VC Avg. Weight	In-VC_67 D3virus	Out-VC_20 Avg. Weight	Out-VC_9 Avg. Weight
Pseudomonas_phage_D3	D3virus	VC_67	186.4	186.4	4.3	8.4
Pseudomonas_phage_PMG1	D3virus	VC_67	186.4	186.4	2.9	7.55
Genome Name	Genus	VC	In-VC Avg. Weight	In-VC_86 E125virus	Out-VC_9 Avg. Weight
Burkholderia_phage_phi1026b	E125virus	VC_86	129.45	129.45	11.3333
Burkholderia_phage_phi6442	E125virus	VC_86	124.85	124.85	8.95
Burkholderia_phage_phiE125	E125virus	VC_86	133.9	133.9	7.9
Genome Name	Genus	VC	In-VC Avg. Weight	In-VC_32 Felixo1virus	Out-VC_1 Avg. Weight	Out-VC_17 Avg. Weight	Out-VC_20 Avg. Weight
Erwinia_phage_phiEa21-4	Felixo1virus	VC_32	116.029	116.029	1.5	5.03	2.52
Escherichia_phage_EC6	Felixo1virus	VC_32	270.571	270.571	1.43333	5.21429	1.46
Escherichia_phage_JH2	Felixo1virus	VC_32	270.514	270.514	1.37	5.98571	1.58
Escherichia_phage_vB_EcoM_AYO145A	Felixo1virus	VC_32	274.171	274.171	1.425	4.98571	1.58
Escherichia_phage_vB_EcoM-VpaE1	Felixo1virus	VC_32	273.329	273.329	1.62857	4.8	1.56
Escherichia_phage_wV8	Felixo1virus	VC_32	273.457	273.457	1.5	4.5	1.64
Salmonella_phage_FelixO1	Felixo1virus	VC_32	271.3	271.3	1.38	4.8625	1.84
Salmonella_phage_HB-2014	Felixo1virus	VC_32	270.886	270.886	1.37143	5.075	1.72
Genome Name	Genus	VC	In-VC Avg. Weight	In-VC_12 G7cvirus	In-VC_12 N4virus	Out-VC_57 Avg. Weight
Enterobacter_phage_IME11	G7cvirus	VC_12	175.771	182.65	134.5	35.25
Enterobacteria_phage_Bp4	G7cvirus	VC_12	186.443	195.883	129.8	34.85
Escherichia_phage_ECBP1	G7cvirus	VC_12	190.9	200.883	131	36.35
Escherichia_phage_vB_EcoP_G7C	G7cvirus	VC_12	169.243	176.617	125	34.3
Escherichia_phage_vB_EcoP_PhAPEC5	G7cvirus	VC_12	180.3	188.6	130.5	36.25
Escherichia_phage_vB_EcoP_PhAPEC7	G7cvirus	VC_12	189.714	198.967	134.2	36.25
Shigella_phage_pSb-1	G7cvirus	VC_12	166.429	173.6	123.4	31.55
Escherichia_phage_N4	N4virus	VC_12	129.771	129.771		39.05
Genome Name	Genus	VC	In-VC Avg. Weight	In-VC_74 Rudivirus	In-VC_74 Gammalipothrixvirus	Out-VC_77 Avg. Weight
Acidianus_filamentous_virus_1	Gammalipothrixvirus	VC_74	3.1	3.1
Acidianus_rod-shaped_virus_1	Rudivirus	VC_74	38.3	38.3
Sulfolobus_islandicus_rod-shaped_virus_1	Rudivirus	VC_74	54.2	79.65	3.3	1.9
Sulfolobus_islandicus_rod-shaped_virus_2	Rudivirus	VC_74	53.4667	78.75	2.9	3.5
Genome Name	Genus	VC	In-VC Avg. Weight	In-VC_202 Gammasphaerolipovirus
Thermus_thermophilus_bacteriophage_P23-77	Gammasphaerolipovirus	VC_202	74.7	74.7
Thermus_thermophilus_phage_IN93	Gammasphaerolipovirus	VC_202	74.7	74.7
Genome Name	Genus	VC	In-VC Avg. Weight	In-VC_204 Globulovirus
Pyrobaculum_spherical_virus	Globulovirus	VC_204	27.1	27.1
Thermoproteus_tenax_spherical_virus_1	Globulovirus	VC_204	27.1	27.1
Genome Name	Genus	VC	In-VC Avg. Weight	In-VC_91 Hapunavirus	In-VC_91 Vhmlvirus	Out-VC_10 Avg. Weight	Out-VC_188 Avg. Weight
Halomonas_phage_phiHAP-1	Hapunavirus	VC_91	44.875	84.5	31.6667	8.03077	2.55
Vibrio_phage_VP882	Hapunavirus	VC_91	57.225	84.5	48.1333	8.80769	1.55
Vibrio_phage_vB_VpaM_MAR	Vhmlvirus	VC_91	88.425	49.95	126.9	15	3.95
Vibrio_phage_VHML	Vhmlvirus	VC_91	75.125	32.15	118.1	15.6231	2.05
Vibrio_phage_VP58.5	Vhmlvirus	VC_91	83.8	37.6	130	15.1231	2.05
Genome Name	Genus	VC	In-VC Avg. Weight	In-VC_45 Hk578virus	Out-VC_14 Avg. Weight	Out-VC_24 Avg. Weight	Out-VC_55 Avg. Weight	Out-VC_9 Avg. Weight
Enterobacteria_phage_JL1	Hk578virus	VC_45	154.533	154.533	10.7438	12.3182	2.3	2.23333
Enterobacteria_phage_SSL2009a	Hk578virus	VC_45	148.1	148.1	8.28125	13.8818	2.1	4.45
Shigella_phage_EP23	Hk578virus	VC_45	147.2	147.2	5.26875	14.4909	2.4	2.36667
Sodalis_phage_SO1	Hk578virus	VC_45	152.233	152.233	10.8313	14.5091	2.4	2.26667
Genome Name	Genus	VC	In-VC Avg. Weight	In-VC_82 Hp1virus	Out-VC_10 Avg. Weight
Aeromonas_phage_phiO18P	Hp1virus	VC_82	47.1	47.1	7.07273
Haemophilus_phage_HP1	Hp1virus	VC_82	65.275	65.275	5.82857
Haemophilus_phage_HP2	Hp1virus	VC_82	66.525	66.525	4.66
Pasteurella_phage_F108	Hp1virus	VC_82	56.25	56.25	4.89091
Vibrio_phage_K139	Hp1virus	VC_82	44	44	4.65455
Genome Name	Genus	VC	In-VC Avg. Weight	In-VC_107 Inovirus
Vibrio_phage_fs1	Inovirus	VC_107	19.05	19.05
Vibrio_phage_Vf33	Inovirus	VC_107	12.6	12.6
Vibrio_phage_VSK	Inovirus	VC_107	17.05	17.05
Genome Name	Genus	VC	In-VC Avg. Weight	In-VC_109 Inovirus
Enterobacteria_phage_fd	Inovirus	VC_109	17.6333	17.6333
Enterobacteria_phage_I2-2	Inovirus	VC_109	14.2	14.2
Enterobacteria_phage_If1	Inovirus	VC_109	10.5333	10.5333
Enterobacteria_phage_Ike	Inovirus	VC_109	9.15	9.15
Enterobacteria_phage_M13	Inovirus	VC_109	17.6333	17.6333
Genome Name	Genus	VC	In-VC Avg. Weight	In-VC_24 Jerseyvirus	In-VC_24 Sp31virus	In-VC_24 K1gvirus	Out-VC_14 Avg. Weight	Out-VC_45 Avg. Weight	Out-VC_55 Avg. Weight	Out-VC_44 Avg. Weight
Salmonella_phage_SETP3	Jerseyvirus	VC_24	123.373	134.875	98.5	89.8	1.2	14	2.2
Salmonella_phage_Ent1	Jerseyvirus	VC_24	121.945	132.775	98.9	90.15		14.075	2.2
Salmonella_phage_Jersey	Jerseyvirus	VC_24	114.955	123.212	99.7	89.55		12.95	2
Salmonella_phage_L13	Jerseyvirus	VC_24	59.8455	64.45	54.8	43.95				2.5
Salmonella_phage_LSPA1	Jerseyvirus	VC_24	113.673	119.4	100.7	97.25		12.075	2.4
Salmonella_phage_SE2	Jerseyvirus	VC_24	115.964	123.9	92.2	96.1		11.825	2.3
Salmonella_phage_SETP13	Jerseyvirus	VC_24	119.436	129.812	99.7	87.8		13.525	2
Salmonella_phage_SETP7	Jerseyvirus	VC_24	122.573	134.312	96.9	88.45		13.675	2.1
Salmonella_phage_SS3e	Jerseyvirus	VC_24	107.609	116.512	89.9	80.85		10.325	2.4
Escherichia_phage_K1-dep(1)	K1gvirus	VC_24	83.9182	80.5444	72.2	126		15.175	5
Escherichia_phage_K1-dep(4)	K1gvirus	VC_24	91.2455	89.2111	74.8	126		14.975	4.8
Salmonella_phage_FSL_SP-031	Sp31virus	VC_24	88.9364	92.3667		73.5		19.2	2.4
Genome Name	Genus	VC	In-VC Avg. Weight	In-VC_37 Kp34virus	In-VC_37 Phikmvvirus	Out-VC_13 Avg. Weight	Out-VC_28 Avg. Weight	Out-VC_4 Avg. Weight	Out-VC_78 Avg. Weight
Klebsiella_phage_F19	Kp34virus	VC_37	106.14	118.575	56.4	17.9667	5.55	3.23333	4.36
Klebsiella_phage_KP34	Kp34virus	VC_37	105.12	116.9	58	17.3333	3.625	2.96667	4.06
Klebsiella_phage_NTUH-K2044-K1-1	Kp34virus	VC_37	76.86	83.075	52	20.1333	6.675	4.13333	5.4
Klebsiella_phage_vB_KpnP_SU503	Kp34virus	VC_37	106.58	119.325	55.6	17.6333	5.375	4.56667	4.2
Klebsiella_phage_vB_KpnP_SU552A	Kp34virus	VC_37	105.7	114.975	68.6	20.2333	4.275		2.54
Pantoea_phage_LIMElight	Phikmvvirus	VC_37	58.12	58.12		22.7667	3.7	3.06667	2.5
Genome Name	Genus	VC	In-VC Avg. Weight	In-VC_14 Tlsvirus	In-VC_14 Kp36virus	In-VC_14 Rogue1virus	In-VC_14 Rtpvirus	In-VC_14 T1virus	Out-VC_45 Avg. Weight	Out-VC_9 Avg. Weight	Out-VC_24 Avg. Weight	Out-VC_28 Avg. Weight
Klebsiella_phage_1513	Kp36virus	VC_14	86.4333	97.95	189.3	68.6	77.65	86.1	8.35	3.2
Klebsiella_phage_KP36	Kp36virus	VC_14	86.1933	95.4	189.3	67.85	77.25	87.8	10.1	5
Escherichia_phage_bV_EcoS_AHP42	Rogue1virus	VC_14	115.473	73.6	69.3	170.48	133.35	81.8	8.7	2.2
Escherichia_phage_bV_EcoS_AHS24	Rogue1virus	VC_14	111.987	72.35	68.15	163.08	130.95	80.375	8.45	2.05
Escherichia_phage_bV_EcoS_AKS96	Rogue1virus	VC_14	115.253	74.2	69.8	169.26	132.5	82.375	8.8	2.3
Escherichia_phage_e4/1c	Rogue1virus	VC_14	111.14	74.75	70.35	155.54	133.55	83.025	8.95	2.43333
Escherichia_phage_EB49	Rogue1virus	VC_14	105.153	71.25	65.35	143.64	134.3	79.325	8.8	3.03333	1.2
Escherichia_phage_Jk06	Rogue1virus	VC_14	83.7333	70.65	66.4	103.88	90.25	70.5	7.35	2.6
Enterobacteria_phage_vB_EcoS_ACG-M12	Rtpvirus	VC_14	104.48	81.95	77.8	122.117	149.9	91.275	9.15	2.15		1.4
Escherichia_phage_Rtp	Rtpvirus	VC_14	108.167	82.85	77.1	129.517	149.9	93.9	8.8	2.2
Enterobacteria_phage_T1	T1virus	VC_14	101.48	103.7	85.5	78.1167	89.9	165.1	8.075	6.53333		1.4
Escherichia_phage_ADB-2	T1virus	VC_14	96.72	102.05	82.4	70.55	83.65	163.767	8.575	5.1
Shigella_phage_pSf-2	T1virus	VC_14	111.2	113.1	90.3	85.9333	99.55	182.167	11.125	2.9
Shigella_phage_Shfl1	T1virus	VC_14	109.053	111	89.6	83.6667	97.25	179.367	10.15	3
Citrobacter_phage_Stevie	Tlsvirus	VC_14	94.86	215.5	96.25	71.25	80.55	106.575	7.5	2.6
Escherichia_phage_Tls	Tlsvirus	VC_14	97.18	215.5	97.1	74.35	84.25	108.35	7.625	1.85		1.2
Genome Name	Genus	VC	In-VC Avg. Weight	In-VC_20 Kpp10virus	In-VC_20 Pakpunavirus	Out-VC_17 Avg. Weight	Out-VC_67 Avg. Weight	Out-VC_32 Avg. Weight
Pseudomonas_phage_KPP10	Kpp10virus	VC_20	143.514	300	80.92	2.66
Pseudomonas_phage_PAK_P3	Kpp10virus	VC_20	143.343	300	80.68	2.46
Pseudomonas_phage_vB_PaeM_PAO1_Ab03	Kpp10virus	VC_20	140.129	300	76.18	2.71	3.6
Pseudomonas_phage_JG004	Pakpunavirus	VC_20	203.443	74.7	300	6.4		1.7375
Pseudomonas_phage_PAK_P1	Pakpunavirus	VC_20	208.043	85.4333	300	6.73		1.5125
Pseudomonas_phage_PAK_P4	Pakpunavirus	VC_20	207.171	83.4	300	6.47		1.8125
Pseudomonas_phage_PaP1	Pakpunavirus	VC_20	206	80.6667	300	6.19		1.625
Pseudomonas_phage_vB_PaeM_C2-10_Ab1	Pakpunavirus	VC_20	202.329	72.1	300	7.16		2
Genome Name	Genus	VC	In-VC Avg. Weight	In-VC_0 L5virus	Out-VC_141 Avg. Weight	Out-VC_21 Avg. Weight	Out-VC_16 Avg. Weight	Out-VC_52 Avg. Weight	Out-VC_7 Avg. Weight	Out-VC_112 Avg. Weight
Mycobacterium_phage_Alma	L5virus	VC_0	78.2154	78.2154	3.8	2.9
Mycobacterium_phage_Bethlehem	L5virus	VC_0	119.508	119.508			2	9.53333	4.45625
Mycobacterium_phage_BillKnuckles	L5virus	VC_0	119.492	119.492				8.5	2.22
Mycobacterium_phage_Bruns	L5virus	VC_0	126.096	126.096			1.66667	11.6333	4.98125
Mycobacterium_phage_Bxb1	L5virus	VC_0	123.75	123.75		1.6		9.6	3.1
Mycobacterium_phage_Bxz2	L5virus	VC_0	80.8615	80.8615	6.1	2.05
Mycobacterium_phage_Che12	L5virus	VC_0	85.6346	85.6346	3.8	1.2
Mycobacterium_phage_D29	L5virus	VC_0	88.7231	88.7231	6.4	3.6
Mycobacterium_phage_Doom	L5virus	VC_0	117.254	117.254			2	6.43333	2.66
Mycobacterium_phage_Euphoria	L5virus	VC_0	126.658	126.658				11.2	2.85385
Mycobacterium_phage_Jasper	L5virus	VC_0	120.208	120.208				10.7	4.39375	2.15
Mycobacterium_phage_KBG	L5virus	VC_0	121.154	121.154		1.5	1.85	10.9667	3.8625	3.95
Mycobacterium_phage_Kugel	L5virus	VC_0	123.381	123.381				12.2667	4.26875	3.7
Mycobacterium_phage_L5	L5virus	VC_0	92.2	92.2	2.2	1.5
Mycobacterium_phage_Lockley	L5virus	VC_0	120.019	120.019				9.3	2.73333
Mycobacterium_phage_Peaches	L5virus	VC_0	78.2346	78.2346	4.2	3.85			1.1
Mycobacterium_phage_Perseus	L5virus	VC_0	120.154	120.154		1.4		8.66667	2.32143
Mycobacterium_phage_Pukovnik	L5virus	VC_0	90.3808	90.3808	4.1	2.45		1.7	1.3
Mycobacterium_phage_SkiPole	L5virus	VC_0	121.165	121.165			1.5	11.2667	6.25
Mycobacterium_phage_Solon	L5virus	VC_0	126.354	126.354				12.3667	4.81875
Mycobacterium_phage_SWU1	L5virus	VC_0	90.6038	90.6038	2.1	1.3
Mycobacterium_phage_Trixie	L5virus	VC_0	88.4885	88.4885	2.1	2.3
Mycobacterium_phage_Turbido	L5virus	VC_0	89.3654	89.3654	2.1	1.3
Mycobacterium_phage_U2	L5virus	VC_0	118.188	118.188				8.26667	2.26667	1.1
Mycobacterium_phage_Violet	L5virus	VC_0	122.7	122.7				7.7	2.28
Rhodococcus_phage_RER2	L5virus	VC_0	58.2308	58.2308
Rhodococcus_phage_RGL3	L5virus	VC_0	61.1654	61.1654
Genome Name	Genus	VC	In-VC Avg. Weight	In-VC_9 Lambdavirus	In-VC_9 N15virus	Out-VC_14 Avg. Weight	Out-VC_26 Avg. Weight	Out-VC_45 Avg. Weight	Out-VC_67 Avg. Weight	Out-VC_86 Avg. Weight
Enterobacteria_phage_HK022	Lambdavirus	VC_9	36.1	48.95	10.4	2.48	11.05	5.6	12.65	10.9667
Enterobacteria_phage_HK97	Lambdavirus	VC_9	38.0667	56.25	1.7	1.1	20.475	1.65	3.3	15.9
Enterobacteria_phage_lambda	Lambdavirus	VC_9	29.4667	26.1	36.2	2.53333	17.7	1.25		3.65
Enterobacteria_phage_N15	N15virus	VC_9	16.1	16.1		3.75625		5.3		4.5
Genome Name	Genus	VC	In-VC Avg. Weight	In-VC_70 Levivirus
Enterobacteria_phage_BZ13	Levivirus	VC_70	5.8	5.8
Enterobacteria_phage_MS2	Levivirus	VC_70	5.8	5.8
Genome Name	Genus	VC	In-VC Avg. Weight	In-VC_59 Liefievirus	Out-VC_141 Avg. Weight	Out-VC_21 Avg. Weight	Out-VC_7 Avg. Weight
Mycobacterium_phage_Halo	Liefievirus	VC_59	171.2	171.2	11.4	22.98	2
Mycobacterium_phage_Liefie	Liefievirus	VC_59	171.2	171.2	11.7	23.36	2.1
Genome Name	Genus	VC	In-VC Avg. Weight	In-VC_57 Lit1virus	Out-VC_12 Avg. Weight	Out-VC_12 Total Weight	Out-VC_12 Connections	Out-VC_12 G7cvirus	Out-VC_12 N4virus
Pseudomonas_phage_LIT1	Lit1virus	VC_57	250.3	250.3	35.2	281.6	8	34.5286	39.9
Pseudomonas_phage_vB_PaeP_C2-10_Ab09	Lit1virus	VC_57	250.3	250.3	35.7625	286.1	8	35.4143	38.2
Genome Name	Genus	VC	In-VC Avg. Weight	In-VC_49 Luz24virus	Out-VC_62 Avg. Weight	Out-VC_62 Total Weight	Out-VC_62 Connections	Out-VC_62 Phieco32virus
Pseudomonas_phage_LUZ24	Luz24virus	VC_49	173.567	173.567	1.475	5.9	4	1.475
Pseudomonas_phage_PaP3	Luz24virus	VC_49	170.533	170.533	1.325	5.3	4	1.325
Pseudomonas_phage_PhiCHU	Luz24virus	VC_49	178.367	178.367	2.9	11.6	4	2.9
Pseudomonas_phage_TL	Luz24virus	VC_49	166.6	166.6	3.3	13.2	4	3.3
Genome Name	Genus	VC	In-VC Avg. Weight	In-VC_44 Nonagvirus	In-VC_44 Seuratvirus	Out-VC_39 Avg. Weight	Out-VC_41 Avg. Weight	Out-VC_24 Avg. Weight
Enterobacteria_phage_9g	Nonagvirus	VC_44	159.025	186.7	76	2.2	5.66667
Enterobacteria_phage_JenK1	Nonagvirus	VC_44	179.1	210.967	83.5	1.7	5.06667
Enterobacteria_phage_JenP1	Nonagvirus	VC_44	182	213.933	86.2	1.7	5.03333
Enterobacteria_phage_JenP2	Nonagvirus	VC_44	184.675	218.467	83.3	1.7	5.03333
Enterobacteria_phage_CAjan	Seuratvirus	VC_44	82.25	82.25			4.93333	2.5
Genome Name	Genus	VC	In-VC Avg. Weight	In-VC_52 Omegavirus	Out-VC_0 Avg. Weight	Out-VC_112 Avg. Weight	Out-VC_16 Avg. Weight	Out-VC_21 Avg. Weight	Out-VC_25 Avg. Weight	Out-VC_35 Avg. Weight	Out-VC_7 Avg. Weight
Mycobacterium_phage_Courthouse	Omegavirus	VC_52	300	300	12.1937	12.4	36.04	1.5	6.74	3.7	13.9437
Mycobacterium_phage_Omega	Omegavirus	VC_52	300	300	9.68	8.65	32.6		4.04	1.9	18.0625
Mycobacterium_phage_Thibault	Omegavirus	VC_52	300	300	7.10667	12.35	20.42		6	7	5.59375
Genome Name	Genus	VC	In-VC Avg. Weight	In-VC_26 P22virus	In-VC_26 Se1virus	Out-VC_9 Avg. Weight
Salmonella_phage_HK620	P22virus	VC_26	61.9667	64	57.9	25.7
Salmonella_phage_ST64T	P22virus	VC_26	63.8333	47.05	97.4	11.7
Shigella_phage_Sf6	P22virus	VC_26	57.8333	60.25	53	17.2333
Salmonella_phage_SE1	Se1virus	VC_26	69.4333	69.4333		11
Genome Name	Genus	VC	In-VC Avg. Weight	In-VC_205 P23virus
Thermus_phage_P2345	P23virus	VC_205	300	300
Thermus_phage_P7426	P23virus	VC_205	300	300
Genome Name	Genus	VC	In-VC Avg. Weight	In-VC_64 P68virus
Staphylococcus_phage_44AHJD	P68virus	VC_64	13	13
Streptococcus_phage_C1	P68virus	VC_64	13	13
Genome Name	Genus	VC	In-VC Avg. Weight	In-VC_92 P70virus	Out-VC_94 Avg. Weight
Listeria_phage_LP-026	P70virus	VC_92	281.8	281.8	15.8
Listeria_phage_LP-037	P70virus	VC_92	290.825	290.825	15.1667
Listeria_phage_LP-110	P70virus	VC_92	285.9	285.9	15.2
Listeria_phage_LP-114	P70virus	VC_92	286	286	15.6667
Listeria_phage_P70	P70virus	VC_92	278.325	278.325	17.5
Genome Name	Genus	VC	In-VC Avg. Weight	In-VC_118 Pagevirus	Out-VC_29 Avg. Weight
Bacillus_phage_Page	Pagevirus	VC_118	154.1	154.1	2.4
Bacillus_phage_Palmer	Pagevirus	VC_118	154.1	154.1	2.4
Bacillus_phage_Pony	Pagevirus	VC_118	149.8	149.8	2.5
Genome Name	Genus	VC	In-VC Avg. Weight	In-VC_27 Pbunavirus
Burkholderia_phage_BcepF1	Pbunavirus	VC_27	74.5222	74.5222
Pseudomonas_phage_14-1	Pbunavirus	VC_27	231.511	231.511
Pseudomonas_phage_DL60	Pbunavirus	VC_27	223.444	223.444
Pseudomonas_phage_DL68	Pbunavirus	VC_27	224.656	224.656
Pseudomonas_phage_F8	Pbunavirus	VC_27	226.633	226.633
Pseudomonas_phage_JG024	Pbunavirus	VC_27	227.744	227.744
Pseudomonas_phage_KPP12	Pbunavirus	VC_27	218.511	218.511
Pseudomonas_phage_LBL3	Pbunavirus	VC_27	224.478	224.478
Pseudomonas_phage_PB1	Pbunavirus	VC_27	224.444	224.444
Pseudomonas_phage_SN	Pbunavirus	VC_27	231.944	231.944
Genome Name	Genus	VC	In-VC Avg. Weight	In-VC_6 Pg1virus
Mycobacterium_phage_Acadian	Pg1virus	VC_6	148.82	148.82
Mycobacterium_phage_Cooper	Pg1virus	VC_6	185.46	185.46
Mycobacterium_phage_Gadjet	Pg1virus	VC_6	98.28	98.28
Mycobacterium_phage_Nigel	Pg1virus	VC_6	183.58	183.58
Mycobacterium_phage_Oline	Pg1virus	VC_6	113.18	113.18
Mycobacterium_phage_Stinger	Pg1virus	VC_6	187.64	187.64
Genome Name	Genus	VC	In-VC Avg. Weight	In-VC_50 Phi29virus
Bacillus_phage_B103	Phi29virus	VC_50	36.3	36.3
Bacillus_phage_GA-1	Phi29virus	VC_50	25.3	25.3
Bacillus_phage_phi29	Phi29virus	VC_50	36.4	36.4
Genome Name	Genus	VC	In-VC Avg. Weight	In-VC_111 Phic31virus
Streptomyces_phage_phiBT1	Phic31virus	VC_111	125.1	125.1
Streptomyces_phage_phiC31	Phic31virus	VC_111	125.1	125.1
Genome Name	Genus	VC	In-VC Avg. Weight	In-VC_85 Phicbkvirus
Caulobacter_phage_karma	Phicbkvirus	VC_85	300	300
Caulobacter_phage_magneto	Phicbkvirus	VC_85	300	300
Caulobacter_phage_phiCbK	Phicbkvirus	VC_85	300	300
Caulobacter_phage_rogue	Phicbkvirus	VC_85	300	300
Caulobacter_phage_swift	Phicbkvirus	VC_85	300	300
Genome Name	Genus	VC	In-VC Avg. Weight	In-VC_62 Phieco32virus	Out-VC_49 Avg. Weight
Enterobacteria_phage_Phieco32	Phieco32virus	VC_62	252.175	252.175	2.175
Escherichia_phage_ECBP2	Phieco32virus	VC_62	217.7	217.7	2.35
Escherichia_phage_KBNP1711	Phieco32virus	VC_62	252.9	252.9	2.225
Phage_vB_EcoP_SU10	Phieco32virus	VC_62	259.35	259.35	2.25
Enterobacteria_phage_NJ01	Phieco32virus	VC_62	213.025	213.025
Genome Name	Genus	VC	In-VC Avg. Weight	In-VC_144 Phifelvirus	Out-VC_11 Avg. Weight	Out-VC_157 Avg. Weight	Out-VC_2 Avg. Weight	Out-VC_154 Avg. Weight
Enterococcus_phage_phiFL1A	Phifelvirus	VC_144	100.65	100.65	2.58	7.35	3.55
Enterococcus_phage_phiFL3A	Phifelvirus	VC_144	65.4	65.4	1.7		2.45	1.8
Enterococcus_phage_phiFL2A	Phifelvirus	VC_144	92.55	92.55		5.05	4.40769
Genome Name	Genus	VC	In-VC Avg. Weight	In-VC_157 Phijl1virus	Out-VC_144 Avg. Weight	Out-VC_2 Avg. Weight	Out-VC_94 Avg. Weight
Lactobacillus_phage_ATCC8014	Phijl1virus	VC_157	66.7	66.7	4.7	1.3
Lactobacillus_phage_phijl1	Phijl1virus	VC_157	66.7	66.7	7.7	1.9	1.36667
Genome Name	Genus	VC	In-VC Avg. Weight	In-VC_13 Phikmvvirus	Out-VC_28 Avg. Weight	Out-VC_37 Avg. Weight	Out-VC_4 Avg. Weight	Out-VC_78 Avg. Weight
Pantoea_phage_LIMEzero	Phikmvvirus	VC_13	28.85	28.85	2.6	23.85	2.6	2.4
Pseudomonas_phage_LKA1	Phikmvvirus	VC_13	42.15	42.15	2.075	17.3167	2.26667	6.66
Pseudomonas_phage_phiKMV	Phikmvvirus	VC_13	40	40	2.4	16.8667		6.7
Genome Name	Genus	VC	In-VC Avg. Weight	In-VC_43 Phikzvirus
Pseudomonas_phage_EL	Phikzvirus	VC_43	59.4	59.4
Pseudomonas_phage_phiKZ	Phikzvirus	VC_43	59.4	59.4
Genome Name	Genus	VC	In-VC Avg. Weight	In-VC_136 Plectrovirus
Spiroplasma_phage_1-C74	Plectrovirus	VC_136	25.3	25.3
Spiroplasma_phage_1-R8A2B	Plectrovirus	VC_136	25.3	25.3
Genome Name	Genus	VC	In-VC Avg. Weight	In-VC_94 Sap6virus	Out-VC_157 Avg. Weight	Out-VC_92 Avg. Weight
Enterococcus_phage_BC611	Sap6virus	VC_94	173.05	173.05	1.5	15.9
Enterococcus_phage_VD13	Sap6virus	VC_94	172.7	172.7	1.5	15.82
Streptococcus_phage_SPQS1	Sap6virus	VC_94	181.75	181.75	1.1	15.88
Genome Name	Genus	VC	In-VC Avg. Weight	In-VC_41 Septima3virus	Out-VC_39 Avg. Weight	Out-VC_44 Avg. Weight
Burkholderia_phage_KL1	Septima3virus	VC_41	111.9	111.9	7.95	5.04
Pseudomonas_phage_73	Septima3virus	VC_41	117.15	117.15	6.575	5.2
Pseudomonas_phage_vB_PaeS_SCH_Ab26	Septima3virus	VC_41	119.15	119.15	6.575	5.2
Genome Name	Genus	VC	In-VC Avg. Weight	In-VC_11 Sfi21dt1virus	In-VC_11 Sfi11virus	Out-VC_144 Avg. Weight	Out-VC_2 Avg. Weight	Out-VC_96 Avg. Weight
Streptococcus_phage_2972	Sfi11virus	VC_11	60.3222	27.78	101	2.4	2.175
Streptococcus_phage_858	Sfi11virus	VC_11	62.4667	29.16	104.1	2.3	3.475
Streptococcus_phage_Alq132	Sfi11virus	VC_11	60.9556	36.52	91.5	2.4	3.58333
Streptococcus_phage_O1205	Sfi11virus	VC_11	73.8333	46.56	107.925	2.75	3.93333	1.5
Streptococcus_phage_Sfi11	Sfi11virus	VC_11	74.8222	45.66	111.275	2	3.10833
Streptococcus_phage_7201	Sfi21dt1virus	VC_11	49.8	83.475	22.86
Streptococcus_phage_Abc2	Sfi21dt1virus	VC_11	50.3111	85.65	22.04		2.7
Streptococcus_phage_DT1	Sfi21dt1virus	VC_11	61.3667	87.3	40.62			4.1
Streptococcus_phage_Sfi19	Sfi21dt1virus	VC_11	67	82.875	54.3			2.1
Streptococcus_phage_Sfi21	Sfi21dt1virus	VC_11	64.8111	88.5	45.86		2.6	3.9
Genome Name	Genus	VC	In-VC Avg. Weight	In-VC_30 Sk1virus	Out-VC_126 Avg. Weight
Lactococcus_phage_712	Sk1virus	VC_30	111.233	111.233	2.95
Lactococcus_Phage_ASCC191	Sk1virus	VC_30	122.733	122.733	2.75
Lactococcus_phage_bIBB29	Sk1virus	VC_30	126.511	126.511	2.95
Lactococcus_phage_bIL170	Sk1virus	VC_30	132.289	132.289	2.6
Lactococcus_phage_CB13	Sk1virus	VC_30	131.333	131.333	2.95
Lactococcus_phage_CB14	Sk1virus	VC_30	131.956	131.956	3.05
Lactococcus_phage_jj50	Sk1virus	VC_30	122.133	122.133	3.2
Lactococcus_phage_P008	Sk1virus	VC_30	127.456	127.456	2.85
Lactococcus_phage_SK1	Sk1virus	VC_30	126.567	126.567	2.9
Lactococcus_phage_SL4	Sk1virus	VC_30	129.522	129.522	3.05
Genome Name	Genus	VC	In-VC Avg. Weight	In-VC_208 Slashvirus	Out-VC_3 Avg. Weight
Bacillus_phage_Slash	Slashvirus	VC_208	300	300	1.5
Bacillus_phage_Staley	Slashvirus	VC_208	300	300
Genome Name	Genus	VC	In-VC Avg. Weight	In-VC_28 Sp6virus	Out-VC_13 Avg. Weight	Out-VC_37 Avg. Weight	Out-VC_4 Avg. Weight	Out-VC_14 Avg. Weight
Enterobacteria_phage_K1-5	Sp6virus	VC_28	98.4667	98.4667	2.3	5.38333	7.66667
Enterobacteria_phage_K1E	Sp6virus	VC_28	93.4	93.4	1.9	5.6	7.06667
Enterobacteria_phage_SP6	Sp6virus	VC_28	87.5333	87.5333	2.3	5.38333	7.66667
Erwinia_amylovora_phage_Era103	Sp6virus	VC_28	43.5333	43.5333	2.93333	3.1	6.1	1.33333
Genome Name	Genus	VC	In-VC Avg. Weight	In-VC_39 Yuavirus	In-VC_39 Ssp2virus	Out-VC_41 Avg. Weight	Out-VC_15 Avg. Weight	Out-VC_44 Avg. Weight
Vibrio_phage_vB_VpaS_MAR10	Ssp2virus	VC_39	8.43333	8.43333		7
Pseudomonas_phage_M6	Yuavirus	VC_39	88.3	127.35	10.2	7.93333	1.25
Pseudomonas_phage_YuA	Yuavirus	VC_39	88.0333	126.7	10.7	8.26667	1.46667
Phage_phiJL001	Yuavirus	VC_39	29.6333	42.25	4.4	4.93333		1.825
Genome Name	Genus	VC	In-VC Avg. Weight	In-VC_40 T5virus	Out-VC_1 Avg. Weight	Out-VC_17 Avg. Weight
Salmonella_phage_Spc35	T5virus	VC_40	297.417	297.417	1.46667
Escherichia_phage_Eps7	T5virus	VC_40	284.433	284.433		1.7
Enterobacteria_phage_DT57C	T5virus	VC_40	293.3	293.3
Escherichia_phage_Akfv33	T5virus	VC_40	299.317	299.317
Escherichia_phage_T5	T5virus	VC_40	296.35	296.35
Escherichia_phage_vB_EcoS_FFH1	T5virus	VC_40	298.433	298.433
Salmonella_phage_Shivani	T5virus	VC_40	290.15	290.15
Genome Name	Genus	VC	In-VC Avg. Weight	In-VC_4 T7virus	Out-VC_13 Avg. Weight	Out-VC_28 Avg. Weight	Out-VC_37 Avg. Weight
Enterobacteria_phage_T7	T7virus	VC_4	76.6	76.6	1.8	9.475	4.7
Kluyvera_phage_Kvp1	T7virus	VC_4	76.6	76.6	2.4	6.35	3.14
Pseudomonad_phage_gh-1	T7virus	VC_4	58.2	58.2	2.6	5.55	2.94
Genome Name	Genus	VC	In-VC Avg. Weight	In-VC_116 Tectivirus
Bacillus_phage_AP50	Tectivirus	VC_116	45.7	45.7
Bacillus_phage_Bam35c	Tectivirus	VC_116	45.7	45.7
Genome Name	Genus	VC	In-VC Avg. Weight	In-VC_21 Tm4virus	Out-VC_0 Avg. Weight	Out-VC_141 Avg. Weight	Out-VC_25 Avg. Weight	Out-VC_35 Avg. Weight	Out-VC_59 Avg. Weight	Out-VC_7 Avg. Weight	Out-VC_52 Avg. Weight
Mycobacterium_phage_Angelica	Tm4virus	VC_21	140.8	140.8	1.6	9.7	2.2	7.1	23.6	4.43333
Mycobacterium_phage_CrimD	Tm4virus	VC_21	141.35	141.35	1.6	9.6	2.2	7.05	23.55	6.1
Mycobacterium_phage_fionn	Tm4virus	VC_21	89.6	89.6	2.38462	9.7		8.85	23.6	4.43333	1.5
Mycobacterium_phage_TM4	Tm4virus	VC_21	99.875	99.875	3	9.9		3.9	21.7	3.3
Mycobacterium_phage_Larva	Tm4virus	VC_21	89.825	89.825		9.5	2.1	3.6	23.4	4.25
Genome Name	Genus	VC	In-VC Avg. Weight	In-VC_154 Tp21virus	Out-VC_123 Avg. Weight	Out-VC_144 Avg. Weight	Out-VC_2 Avg. Weight
Bacillus_phage_BMBtp2	Tp21virus	VC_154	129.5	129.5	1.7	1.9	2.21111
Bacillus_phage_TP21-L	Tp21virus	VC_154	129.5	129.5	1.6	1.7	2.76667
Genome Name	Genus	VC	In-VC Avg. Weight	In-VC_38 Triavirus	Out-VC_149 Avg. Weight	Out-VC_2 Avg. Weight
Staphylococcus_phage_3A	Triavirus	VC_38	123.667	123.667	6.3	20.7273
Staphylococcus_phage_47	Triavirus	VC_38	125.667	125.667	6.4	19.5758
Staphylococcus_phage_Ipla35	Triavirus	VC_38	109.567	109.567	6.6	18.9735
Staphylococcus_phage_Phi12	Triavirus	VC_38	114.167	114.167	7.6	16.4818
Genome Name	Genus	VC	In-VC Avg. Weight	In-VC_18 Vi1virus	Out-VC_1 Avg. Weight	Out-VC_87 Avg. Weight
Dickeya_phage_Limestone	Vi1virus	VC_18	300	300	24.2237	10
Escherichia_phage_ECML-4	Vi1virus	VC_18	300	300	22.8526	8.73333
Escherichia_phage_PhaxI	Vi1virus	VC_18	300	300	21.2579	8.36667
Salmonella_phage_Det7	Vi1virus	VC_18	300	300	23.4447	8.33333
Salmonella_phage_Marshall	Vi1virus	VC_18	300	300	22.8421	8.43333
Salmonella_phage_Maynard	Vi1virus	VC_18	300	300	23.1368	8.6
Salmonella_phage_SFP10	Vi1virus	VC_18	300	300	23.5789	8.63333
Salmonella_phage_vB_SalM_SJ2	Vi1virus	VC_18	300	300	24.5184	8.76667
Salmonella_phage_vB_SalM_SJ3	Vi1virus	VC_18	300	300	22.0526	8.33333
Salmonella_phage_ViI	Vi1virus	VC_18	300	300	22.9184	8.4
Shigella_phage_Ag3	Vi1virus	VC_18	300	300	23.3684	8.13333
Genome Name	Genus	VC	In-VC Avg. Weight	In-VC_104 Vp5virus	Out-VC_55 Avg. Weight
Vibrio_phage_phiVC8	Vp5virus	VC_104	131.55	131.55	2.8
Vibrio_phage_VP2	Vp5virus	VC_104	129.6	129.6	2.9
Vibrio_phage_VP5	Vp5virus	VC_104	129.15	129.15	2.8
Genome Name	Genus	VC	In-VC Avg. Weight	In-VC_78 Xp10virus	Out-VC_13 Avg. Weight	Out-VC_37 Avg. Weight
Xanthomonas_phage_CP1	Xp10virus	VC_78	89.75	89.75	6.96667	4.86667
Xanthomonas_phage_OP1	Xp10virus	VC_78	115.875	115.875	4.8	3.58333
Xanthomonas_phage_phiL7	Xp10virus	VC_78	84.25	84.25	4.86667	3.61667
Xanthomonas_phage_Xop411	Xp10virus	VC_78	115.35	115.35	4.86667	3.61667
Xanthomonas_phage_Xp10	Xp10virus	VC_78	113.725	113.725	4.76667	3.53333
